# Supplementary material for: A solvent controlled three-component reaction of diazo compounds for the synthesis of hydrazone compounds under Brønsted acid catalysis
Source: Royal Society of Chemistry journal article supplement (doi:10.1039/d2nj04983j), 2022-01-01
Supplement: d2nj04983j1.pdf [file d2nj04983j1.pdf]

## Supporting Information

# Solvent Controlled Three-Component Reaction of Diazo Compounds for the Synthesis of Hydrazone Compounds under Brønsted Acid Catalysis

Hangli He <sup>a, b</sup>, Zhewei Yan <sup>a, b</sup>, Junyong Wang <sup>b</sup>, Qiongjiao Yan <sup>a</sup>, Wei Wang <sup>a</sup>,  
Haifeng Wang <sup>\*a, b</sup>, Fener Chen <sup>\*a, c, d</sup>

<sup>a</sup> Pharmaceutical Research Institute, Wuhan Institute of Technology, Wuhan 430205, China

<sup>b</sup> School of Chemical Engineering & Pharmacy, Wuhan Institute of Technology, Wuhan 430205, China

<sup>c</sup> Engineering Center of Catalysis and Synthesis for Chiral Molecules, Department of Chemistry, Fudan University, Shanghai 200433, China

<sup>d</sup> Shanghai Engineering Center of Industrial Catalysis for Chiral Drugs, Shanghai 200433, China.

Email: rfchen@fudan.edu.cn; skytacle@139.com.

## Table of Contents

|    |                                                                        |    |
|----|------------------------------------------------------------------------|----|
| 1. | General Information and Materials.....                                 | 2  |
| 2. | General Experimental Procedures.....                                   | 2  |
| 3. | Mechanistic Studies .....                                              | 4  |
| 4. | References .....                                                       | 4  |
| 5. | Characterization Data of Compounds .....                               | 5  |
| 6. | NMR Spectra of Compounds .....                                         | 15 |
| 7. | X-ray Diffraction Parameters and Data of <b>3n</b> and <b>4k</b> ..... | 52 |

## 1. General Information and Materials

All  $^1\text{H}$  NMR (400 MHz) and  $^{13}\text{C}$  NMR (100 MHz) and  $^{19}\text{F}$  NMR (376 MHz) spectra were recorded on Bruker spectrometers in  $\text{DMSO-}d_6$ . Chemical shifts ( $\delta$ ) for NMR were quoted in ppm relative to the solvent peak (2.50 ppm for  $^1\text{H}$  and 40.00 ppm for  $^{13}\text{C}$  in  $\text{DMSO-}d_6$ ). Chemical shifts are reported in parts per million as follows: chemical shift, multiplicity (s = singlet, d = doublet, t = triplet, q = quartet, m = multiplet). Coupling constants  $J$  are recorded in Hz. High-resolution mass spectra (HRMS) were reported from the Thermo Orbitrap Elite or Bruker Daltonics APEXII 47e FT-ICR instrument with an ESI source. Single crystal X-ray diffraction data (**3n** and **4k**) was recorded on Bruker-AXS SMART APEX II single crystal X-ray diffractometer.

Unless otherwise noted, all reactions were carried out under nitrogen in a flamedried or oven-dried flask containing magnetic stir bar. Diazo compounds **1a-t** were prepared according to literature reported procedure<sup>1</sup>. *N*-aminophthalimide (**2**) was purchased from Bidepharm.com and were used directly without further purification. The other materials obtained from commercial suppliers were used directly without further purification. Reactions were monitored by thin layer chromatography (TLC) using pre-coated silica gel plates (GF254). Flash column chromatography was performed on silica gel (particle size 200-300 mesh ASTM) and eluted with petroleum ether/ethylacetate. Solvents for the column chromatography were distilled before used.

## 2. General Experimental Procedures

### 2.1 General procedure to synthesize **3**:

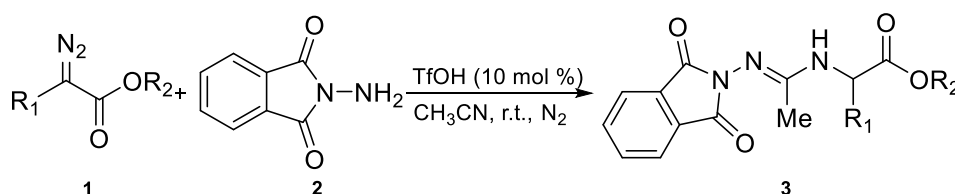

$\alpha$ -Diazo ester **1** (0.26 mmol), *N*-aminophthalimide **2** (32.4 mg, 0.20 mmol) and

CH<sub>3</sub>CN (1 mL) were added into a 10 mL glass tube. Then a solution of CF<sub>3</sub>SO<sub>3</sub>H (3.0 mg, 0.02 mmol, 10 mol %) dissolved in CH<sub>3</sub>CN (1 mL) was introduced into the reaction mixture. The resulting mixture was continually stirred under nitrogen atmosphere at room temperature for 5 mins. The reaction solution was quenched with saturated aq. NaCl and extracted with CH<sub>2</sub>Cl<sub>2</sub> (5 mL×3). The combined organic phase was dried over anhydrous Na<sub>2</sub>SO<sub>4</sub>, filtrated and concentrated under reduced pressure. The crude product was purified by column chromatography on silica gel (petroleum ether/ethyl acetate = 4:1) to afford the pure product **3**.

## 2.2 General procedure to synthesize **4**:

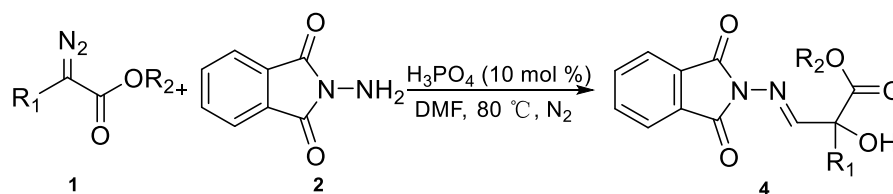

$\alpha$ -Diazo ester **1** (0.40 mmol), *N*-aminophthalimide **2** (32.4 mg, 0.20 mmol) and DMF (1 mL) were added into a 10 mL glass tube. Then a solution of H<sub>3</sub>PO<sub>4</sub> (3.0 mg, 0.02 mmol, 10 mol %) dissolved in DMF (1 mL) was introduced into the reaction mixture. The resulting mixture was continually stirred under nitrogen atmosphere at 80 °C for 5 hours. The reaction solution was quenched with saturated aq. NaCl and extracted with CH<sub>2</sub>Cl<sub>2</sub> (5 mL×3). The combined organic phase was dried over anhydrous Na<sub>2</sub>SO<sub>4</sub>, filtrated and concentrated under reduced pressure. The crude product was purified by column chromatography on silica gel (petroleum ether/ethyl acetate = 3:1) to afford the pure product **4**.

### 3. Mechanistic Studies

#### 1) Active intermediate studied

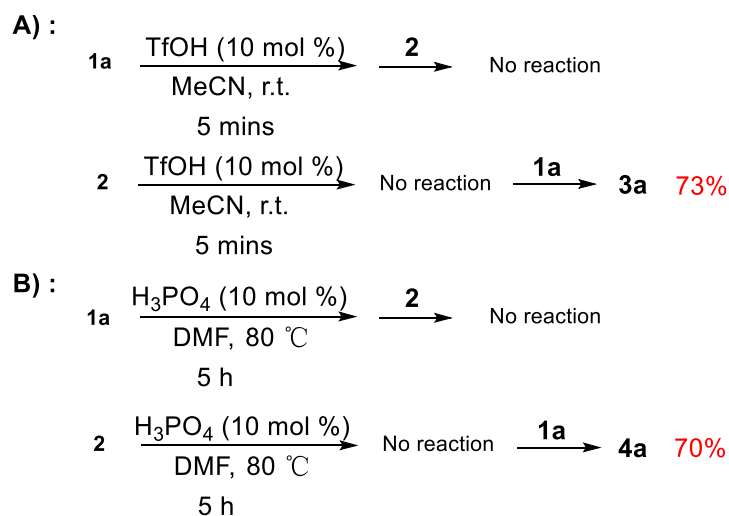

#### 2) Anhydrous experiment

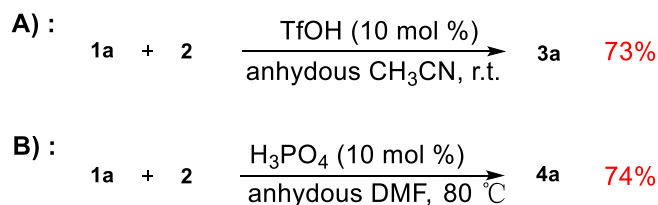

#### 2) Deuteration studied

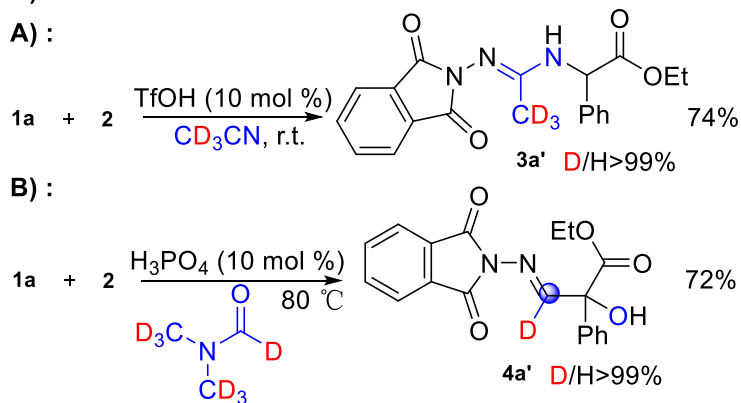

Scheme 4. Mechanistic studies

### 4. References

(1) (a) M. Hu, J. Rong, W. Miao, C. Ni, Y. Han and J. Hu, Copper-mediated trifluoromethylthiolation of alpha-diazoesters, *Org Lett*, 2014, **16**, 2030-2033; (b) J. X. Guo, T. Zhou, B. Xu, S. F. Zhu and Q. L. Zhou, Enantioselective synthesis of alpha-

## 5. Characterization Data of Compounds

### ethyl (*E*)-2-(*N'*-(1,3-dioxisoindolin-2-yl)acetimidamido)-2-phenylacetate (3a)

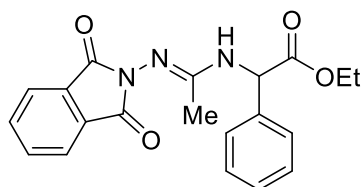

Yellow oil, yield: 73%

$^1\text{H}$  NMR (400 MHz,  $\text{DMSO-}d_6$ ):  $\delta$  = 7.99 (d,  $J$  = 6.7 Hz, 1H), 7.81 (d,  $J$  = 8.7 Hz, 4H), 7.57 – 7.47 (m, 2H), 7.46 – 7.37 (m, 3H), 5.48 (d,  $J$  = 6.6 Hz, 1H), 4.22 – 4.07 (m, 2H), 1.85 (s, 3H), 1.17 (t,  $J$  = 7.1 Hz, 3H);  $^{13}\text{C}$  NMR (100 MHz,  $\text{DMSO-}d_6$ ):  $\delta$  = 170.9, 167.0, 165.6, 136.5, 134.6, 131.0, 129.2, 128.8, 128.3, 123.1, 61.3, 58.9, 16.2, 14.4; HRMS (ESI):  $m/z$   $[\text{M}+\text{H}]^+$  calcd for  $\text{C}_{20}\text{H}_{19}\text{N}_3\text{O}_4^+$ : 366.1448; found: 366.1450.

### ethyl (*E*)-2-(*N'*-(1,3-dioxisoindolin-2-yl)acetimidamido)-2-(2-nitrophenyl)acetate (3b)

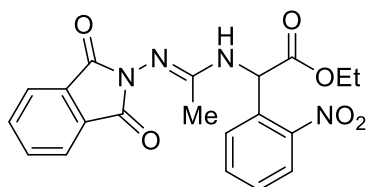

Yellow oil, yield: 63%

$^1\text{H}$  NMR (400 MHz,  $\text{DMSO-}d_6$ ):  $\delta$  = 8.27 (d,  $J$  = 7.5 Hz, 1H), 8.08 (d,  $J$  = 8.1 Hz, 1H), 7.85 – 7.76 (m, 5H), 7.72 (d,  $J$  = 7.8 Hz, 1H), 7.63 (d,  $J$  = 7.4 Hz, 1H), 6.35 (d,  $J$  = 7.5 Hz, 1H), 4.16 (q,  $J$  = 7.1 Hz, 2H), 1.88 (s, 3H), 1.18 (t,  $J$  = 7.1 Hz, 3H).;  $^{13}\text{C}$  NMR (100 MHz,  $\text{DMSO-}d_6$ ):  $\delta$  = 169.3, 166.8, 165.4, 148.8, 134.6, 134.3, 131.8, 131.0, 130.1, 129.9, 125.3, 123.1, 62.0, 54.5, 16.3, 14.3; HRMS (ESI):  $m/z$   $[\text{M}+\text{H}]^+$  calcd for  $\text{C}_{20}\text{H}_{19}\text{N}_4\text{O}_6^+$ : 411.1299; found: 411.1305.

### ethyl (*E*)-2-(*N'*-(1,3-dioxisoindolin-2-yl)acetimidamido)-2-(3-(trifluoromethyl)phenyl)acetate (3c)

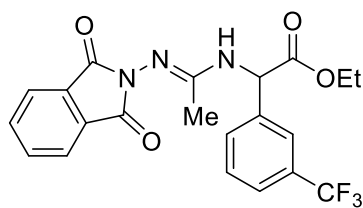

Yellow oil, yield: 59%

$^1\text{H}$  NMR (400 MHz,  $\text{DMSO-}d_6$ ):  $\delta$  = 8.00 (d,  $J$  = 6.8 Hz, 1H), 7.80 (s, 4H), 7.63 (d,  $J$  = 8.5 Hz, 2H), 7.45 (d,  $J$  = 8.4 Hz, 2H), 5.50 (d,  $J$  = 6.8 Hz, 1H), 4.14 (dd,  $J$  = 12.9, 7.1 Hz, 2H), 1.85 (s, 3H), 1.17 (t,  $J$  = 7.1 Hz, 3H);  $^{13}\text{C}$  NMR (100 MHz,  $\text{DMSO-}d_6$ ):  $\delta$  = 170.5, 166.9, 165.5, 136.0, 134.7, 134.5, 132.0, 131.0, 130.5, 123.2, 123.1, 122.0, 61.4, 58.1, 16.2, 14.3;  $^{19}\text{F}$  NMR (376 MHz,  $\text{DMSO-}d_6$ ):  $\delta$  = -61.1; HRMS (ESI):  $m/z$   $[\text{M}+\text{H}]^+$  calcd for  $\text{C}_{21}\text{H}_{19}\text{F}_3\text{N}_3\text{O}_4^+$ : 434.1322; found: 434.1330.

### ethyl (*E*)-2-(*N'*-(1,3-dioxisoindolin-2-yl)acetimidamido)-2-(4-nitrophenyl)acetate (3d)

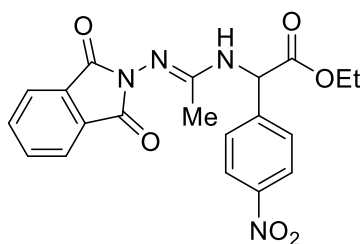

Yellow oil, yield: 82%

$^1\text{H}$  NMR (400 MHz, DMSO- $d_6$ ):  $\delta$  = 8.28 (d,  $J$  = 8.8 Hz, 2H), 8.21 (d,  $J$  = 7.0 Hz, 1H), 7.78 (d,  $J$  = 10.4 Hz, 6H), 5.73 (d,  $J$  = 7.0 Hz, 1H), 4.16 (dd,  $J$  = 12.5, 7.1 Hz, 2H), 1.88 (s, 3H), 1.18 (t,  $J$  = 7.1 Hz, 3H);  $^{13}\text{C}$  NMR (100 MHz, DMSO- $d_6$ ):  $\delta$  = 167.0, 166.9, 165.5, 147.8, 144.0, 134.6, 131.0, 129.7, 124.1, 123.2, 61.9, 58.1, 16.3, 14.3;

HRMS (ESI):  $m/z$   $[\text{M}+\text{H}]^+$  calcd for  $\text{C}_{20}\text{H}_{19}\text{N}_4\text{O}_6^+$ : 411.1299; found: 411.1304.

**ethyl (E)-2-(4-cyanophenyl)-2-(N'-(1,3-dioxisoindolin-2-yl)acetimidamido)acetate (3e)**

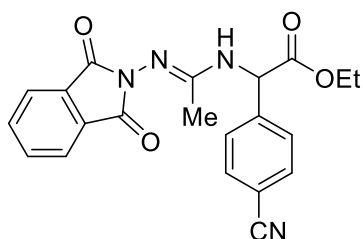

Yellow oil, yield: 70%

$^1\text{H}$  NMR (400 MHz, DMSO- $d_6$ ):  $\delta$  = 8.13 (d,  $J$  = 7.0 Hz, 1H), 7.92 – 7.88 (m, 2H), 7.79 (s, 4H), 7.70 (d,  $J$  = 8.2 Hz, 2H), 5.66 (d,  $J$  = 7.0 Hz, 1H), 4.15 (dd,  $J$  = 12.1, 7.1 Hz, 2H), 1.87 (s, 3H), 1.18 (t,  $J$  = 7.1 Hz, 3H);  $^{13}\text{C}$  NMR (100 MHz, DMSO- $d_6$ ):  $\delta$  = 170.0, 166.9, 165.5, 142.0, 134.6, 133.0, 131.0, 129.3, 123.1, 118.9, 111.6, 61.7,

58.3, 16.2, 14.3; HRMS (ESI):  $m/z$   $[\text{M}+\text{H}]^+$  calcd for  $\text{C}_{21}\text{H}_{19}\text{N}_4\text{O}_4^+$ : 391.1401; found: 391.1404.

**ethyl (E)-2-(N'-(1,3-dioxisoindolin-2-yl)acetimidamido)-2-(o-tolyl)acetate (3f)**

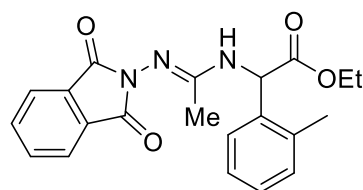

Yellow oil, yield: 70%

$^1\text{H}$  NMR (400 MHz, DMSO- $d_6$ ):  $\delta$  = 7.92 (d,  $J$  = 7.1 Hz, 1H), 7.80 (s, 4H), 7.32 – 7.23 (m, 4H), 5.76 (d,  $J$  = 7.2 Hz, 1H), 4.15 (dd,  $J$  = 9.1, 7.1 Hz, 2H), 2.41 (s, 3H), 1.83 (s, 3H), 1.17 (t,  $J$  = 7.1 Hz, 3H);  $^{13}\text{C}$  NMR (100 MHz,

DMSO- $d_6$ ):  $\delta$  = 171.2, 166.9, 165.7, 137.2, 135.4, 134.6, 131.1, 131.0, 128.7, 127.4, 126.7, 123.1, 61.3, 55.2, 19.4, 16.2, 14.4; HRMS (ESI):  $m/z$   $[\text{M}+\text{H}]^+$  calcd for  $\text{C}_{21}\text{H}_{22}\text{N}_3\text{O}_4^+$ : 380.1605; found: 380.1611.

**ethyl (E)-2-(N'-(1,3-dioxisoindolin-2-yl)acetimidamido)-2-(p-tolyl)acetate (3g)**

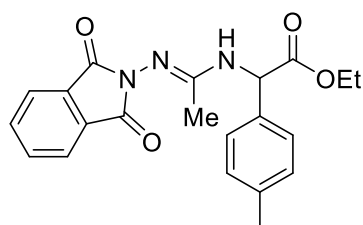

Yellow oil, yield: 62%

$^1\text{H}$  NMR (400 MHz, DMSO- $d_6$ ):  $\delta$  = 7.92 (d,  $J$  = 6.6 Hz, 1H), 7.80 (s, 4H), 7.36 (d,  $J$  = 8.0 Hz, 2H), 7.23 (d,  $J$  = 8.0 Hz, 2H), 5.41 (d,  $J$  = 6.6 Hz, 1H), 4.11 (dd,  $J$  = 16.4, 7.1 Hz, 2H), 2.32 (s, 3H), 1.84 (s, 3H), 1.17 (t,  $J$  = 7.1 Hz, 3H);  $^{13}\text{C}$  NMR (100 MHz, DMSO- $d_6$ ):  $\delta$  = 171.0,

167.0, 165.6, 138.2, 134.6, 133.5, 131.0, 129.7, 128.2, 123.1, 61.2, 58.6, 21.1, 16.2, 14.4; HRMS (ESI):  $m/z$   $[\text{M}+\text{H}]^+$  calcd for  $\text{C}_{21}\text{H}_{22}\text{N}_3\text{O}_4^+$ : 380.1605; found: 380.1608.

**ethyl (E)-2-(N'-(1,3-dioxisoindolin-2-yl)acetimidamido)-2-(2-fluorophenyl)acetate (3h)**

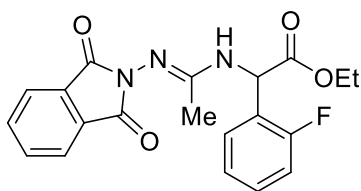

Yellow oil, yield: 71%

$^1\text{H NMR}$  (400 MHz,  $\text{DMSO-}d_6$ ):  $\delta$  = 8.04 (d,  $J$  = 7.1 Hz, 1H), 7.80 (s, 4H), 7.51 (dd,  $J$  = 8.3, 6.8 Hz, 1H), 7.45 (dd,  $J$  = 6.3, 1.8 Hz, 1H), 7.28 (t,  $J$  = 8.1 Hz, 2H), 5.82 (d,  $J$  = 7.1 Hz, 1H), 4.15 (t,  $J$  = 7.1 Hz, 2H), 1.85 (s, 3H), 1.17 (t,  $J$  = 7.1 Hz, 3H);  $^{13}\text{C NMR}$  (100 MHz,  $\text{DMSO-}d_6$ ):  $\delta$  = 170.1, 166.9, 165.6, 134.6, 131.0, 130.9, 129.9, 129.8, 125.2, 125.2, 124.0, 123.1, 116.2, 116.0, 61.5, 51.9, 16.2, 14.3;  $^{19}\text{F NMR}$  (376 MHz,  $\text{DMSO-}d_6$ ):  $\delta$  = -117.4 – -117.5 (m); HRMS (ESI):  $m/z$   $[\text{M}+\text{H}]^+$  calcd for  $\text{C}_{20}\text{H}_{19}\text{FN}_3\text{O}_4^+$ : 384.1354; found: 384.1358.

**ethyl (*E*)-2-(*N'*-(1,3-dioxoisindolin-2-yl)acetimidamido)-2-(2-iodophenyl)acetate (3i)**

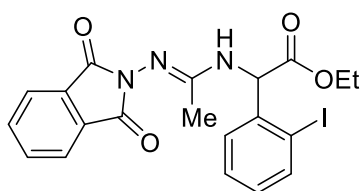

Yellow oil, yield: 74%

$^1\text{H NMR}$  (400 MHz,  $\text{DMSO-}d_6$ ):  $\delta$  = 7.97 – 7.92 (m, 2H), 7.80 (s, 4H), 7.51 – 7.42 (m, 2H), 7.14 (td,  $J$  = 7.8, 1.8 Hz, 1H), 5.74 (d,  $J$  = 6.6 Hz, 1H), 4.15 (dd,  $J$  = 9.2, 7.1 Hz, 2H), 1.84 (s, 3H), 1.19 (t,  $J$  = 7.1 Hz, 3H);  $^{13}\text{C NMR}$  (100 MHz,  $\text{DMSO-}d_6$ ):  $\delta$  = 170.5, 166.8, 165.6, 140.18, 139.5, 134.6, 131.1, 130.8, 129.2, 128.7, 123.1, 101.9, 62.9, 61.5, 16.2, 14.3; HRMS (ESI):  $m/z$   $[\text{M}+\text{H}]^+$  calcd for  $\text{C}_{20}\text{H}_{19}\text{IN}_3\text{O}_4^+$ : 492.0415; found: 492.0407.

**ethyl (*E*)-2-(2-chlorophenyl)-2-(*N'*-(1,3-dioxoisindolin-2-yl)acetimidamido)acetate (3j)**

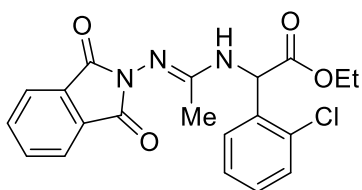

Yellow oil, yield: 70%

$^1\text{H NMR}$  (400 MHz,  $\text{DMSO-}d_6$ ):  $\delta$  = 8.01 (d,  $J$  = 7.0 Hz, 1H), 7.80 (s, 4H), 7.57 – 7.49 (m, 2H), 7.44 – 7.38 (m, 2H), 5.95 (d,  $J$  = 7.0 Hz, 1H), 4.15 (dtd,  $J$  = 8.6, 4.9, 4.7, 3.7 Hz, 2H), 1.85 (s, 3H), 1.18 (t,  $J$  = 7.1 Hz, 3H);  $^{13}\text{C NMR}$  (100 MHz,  $\text{DMSO-}d_6$ ):  $\delta$  = 170.2, 166.9, 165.5, 134.5, 134.5, 133.7, 131.0, 130.5, 130.1, 129.6, 128.0, 123.1, 61.5, 55.5, 16.2, 14.3; HRMS (ESI):  $m/z$   $[\text{M}+\text{H}]^+$  calcd for  $\text{C}_{20}\text{H}_{19}\text{F}_3\text{ClN}_3\text{O}_4^+$ : 400.1059; found: 400.1068.

**ethyl (*E*)-2-(3-chlorophenyl)-2-(*N'*-(1,3-dioxoisindolin-2-yl)acetimidamido)acetate (3k)**

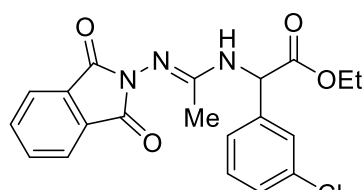

Yellow oil, yield: 65%

$^1\text{H NMR}$  (400 MHz,  $\text{DMSO-}d_6$ ):  $\delta$  = 7.98 (d,  $J$  = 6.7 Hz, 1H), 7.80 (s, 4H), 7.49 – 7.39 (m, 4H), 5.46 (d,  $J$  = 6.6 Hz, 1H), 4.22 – 3.98 (m, 2H), 1.85 (s, 3H), 0.77 (d,  $J$  = 4.7 Hz, 3H);  $^{13}\text{C NMR}$  (100 MHz,  $\text{DMSO-}d_6$ ):  $\delta$  = 170.4, , 167.0, 165.6, 138.9, 134.6, 133.7, 131.0, 128.8, 128.1, 127.2, 123.1, 61.6, 58.2, 16.2, 14.3; HRMS (ESI):  $m/z$   $[\text{M}+\text{H}]^+$  calcd for  $\text{C}_{20}\text{H}_{19}\text{ClN}_3\text{O}_4^+$ : 400.1059; found: 400.1063.

**ethyl (E)-2-(N'-(1,3-dioxoisindolin-2-yl)acetimidamido)-2-(4-fluorophenyl)acetate (3l)**

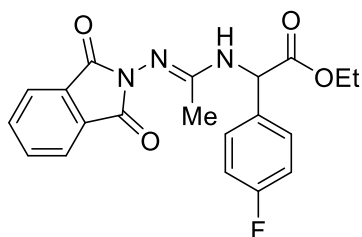

Yellow oil, yield: 68%

$^1\text{H NMR}$  (400 MHz,  $\text{DMSO-}d_6$ ):  $\delta$  = 8.00 (d,  $J$  = 6.6 Hz, 1H), 7.80 (s, 4H), 7.54 (dd,  $J$  = 8.6, 5.5 Hz, 2H), 7.26 (t,  $J$  = 8.8 Hz, 2H), 5.49 (d,  $J$  = 6.6 Hz, 1H), 4.13 (qd,  $J$  = 10.7, 7.1 Hz, 2H), 1.85 (s, 3H), 1.17 (t,  $J$  = 7.1 Hz, 3H);  $^{13}\text{C NMR}$  (100 MHz,  $\text{DMSO-}d_6$ ):  $\delta$  = 170.8, 166.9, 165.6, 134.6, 132.8, 131.0, 130.5, 130.5, 123.1, 116.0, 115.9,

61.4, 58.1, 16.2, 14.3;  $^{19}\text{F NMR}$  (376 MHz,  $\text{DMSO-}d_6$ ):  $\delta$  = -113.65 – -113.87 (m); HRMS (ESI):  $m/z$   $[\text{M}+\text{H}]^+$  calcd for  $\text{C}_{20}\text{H}_{19}\text{FN}_3\text{O}_4^+$ : 384.1354; found: 384.1367.

**ethyl (E)-2-(4-bromophenyl)-2-(N'-(1,3-dioxoisindolin-2-yl)acetimidamido)acetate (3m)**

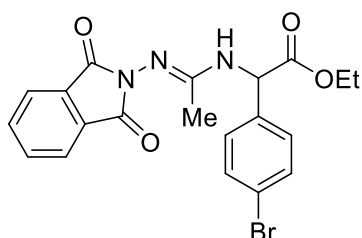

Yellow oil, yield: 57%

$^1\text{H NMR}$  (400 MHz,  $\text{DMSO-}d_6$ ):  $\delta$  = 8.12 (d,  $J$  = 6.7 Hz, 1H), 7.87 – 7.67 (m, 8H), 5.67 (d,  $J$  = 6.8 Hz, 1H), 4.16 (dd,  $J$  = 10.3, 7.2 Hz, 2H), 1.87 (s, 3H), 1.17 (t,  $J$  = 7.1 Hz, 3H);  $^{13}\text{C NMR}$  (100 MHz,  $\text{DMSO-}d_6$ ):  $\delta$  = 170.3, 166.9, 165.5, 137.9, 134.5, 132.5, 131.0, 130.2, 125.5, 124.7, 123.1, 61.6, 58.1, 16.2, 14.2; HRMS (ESI):  $m/z$

$[\text{M}+\text{H}]^+$  calcd for  $\text{C}_{20}\text{H}_{19}\text{BrN}_3\text{O}_4^+$ : 444.0553; found: 444.0557.

**ethyl (E)-2-(2,4-dichlorophenyl)-2-(N'-(1,3-dioxoisindolin-2-yl)acetimidamido)acetate (3n)**

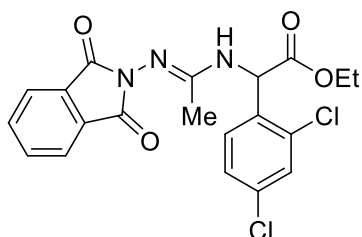

Yellow oil, yield: 71%

$^1\text{H NMR}$  (400 MHz,  $\text{DMSO-}d_6$ ):  $\delta$  = 8.11 (d,  $J$  = 7.2 Hz, 1H), 7.79 (s, 4H), 7.71 (d,  $J$  = 0.7 Hz, 1H), 7.53 (d,  $J$  = 1.5 Hz, 2H), 5.92 (d,  $J$  = 7.0 Hz, 1H), 4.17 (dt,  $J$  = 7.2, 2.9 Hz, 2H), 1.85 (s, 3H), 1.18 (t,  $J$  = 7.1 Hz, 3H);  $^{13}\text{C NMR}$  (100 MHz,  $\text{DMSO-}d_6$ ):  $\delta$  = 169.8, 166.8, 165.5, 134.7, 134.6, 134.2, 133.9, 131.0, 131.0, 129.6, 128.2,

123.1, 61.8, 55.1, 16.3, 14.3; HRMS (ESI):  $m/z$   $[\text{M}+\text{H}]^+$  calcd for  $\text{C}_{20}\text{H}_{18}\text{Cl}_2\text{N}_3\text{O}_4^+$ : 434.0669; found: 434.0676.

**isobutyl (E)-2-(N'-(1,3-dioxoisindolin-2-yl)acetimidamido)-2-phenylacetate (3o)**

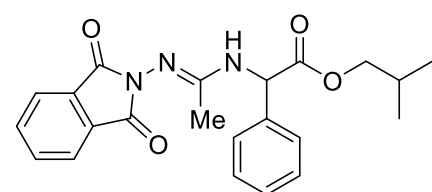

Yellow oil, yield: 57%

$^1\text{H NMR}$  (400 MHz,  $\text{DMSO-}d_6$ ):  $\delta$  = 7.99 (d,  $J$  = 6.8 Hz, 1H), 7.80 (s, 4H), 7.51 (dd,  $J$  = 8.1, 1.3 Hz, 2H), 7.45 – 7.38 (m, 3H), 5.52 (d,  $J$  = 6.8 Hz, 1H), 3.87 (dd,  $J$  = 6.5, 1.3 Hz, 2H), 1.86 (s, 3H), 0.79 (dd,  $J$  = 6.7, 5.4 Hz, 6H);  $^{13}\text{C NMR}$  (100 MHz,

$\text{DMSO-}d_6$ ):  $\delta$  = 170.9, 167.0, 165.6, 136.6, 134.5, 131.0, 129.1, 128.8, 128.3, 123.1, 70.9, 58.8, 27.6, 19.1, 19.1, 16.1; HRMS (ESI):  $m/z$   $[\text{M}+\text{H}]^+$  calcd for  $\text{C}_{22}\text{H}_{24}\text{N}_3\text{O}_4^+$ :



394.1761; found: 394.1768.

**isopentyl (*E*)-2-(*N'*-(1,3-dioxoisindolin-2-yl)acetimidamido)-2-phenylacetate (3p)**

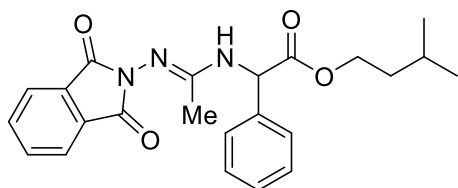

Yellow oil, yield: 52%

$^1\text{H NMR}$  (400 MHz,  $\text{DMSO-}d_6$ ):  $\delta$  = 7.96 (d,  $J$  = 6.7 Hz, 1H), 7.80 (s, 4H), 7.51 – 7.47 (m, 2H), 7.39 (ddd,  $J$  = 12.4, 8.3, 5.5 Hz, 3H), 5.47 (d,  $J$  = 6.6 Hz, 1H), 4.11 (ddd,  $J$  = 17.5, 10.9, 4.4 Hz, 2H), 1.85 (s, 3H), 1.54 (dt,  $J$  = 13.3, 6.6 Hz, 1H), 1.43 (q,  $J$  = 6.8 Hz, 2H), 0.78 (dd,  $J$  = 6.6, 2.0 Hz, 6H);  $^{13}\text{C NMR}$  (100 MHz,  $\text{DMSO-}d_6$ ):  $\delta$  = 170.9, 166.9, 165.5, 136.4, 134.5, 131.0, 129.1, 128.8, 128.3, 123.1, 63.6, 58.9, 37.1, 24.7, 22.5, 16.1; HRMS (ESI):  $m/z$   $[\text{M}+\text{H}]^+$  calcd for  $\text{C}_{23}\text{H}_{26}\text{N}_3\text{O}_4^+$ : 408.1918; found: 408.1924.

**benzyl (*E*)-2-(*N'*-(1,3-dioxoisindolin-2-yl)acetimidamido)-2-phenylacetate (3q)**

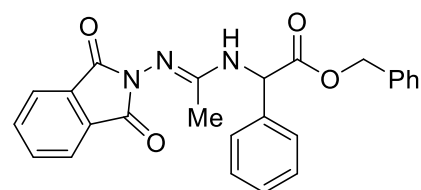

Yellow oil, yield: 49%

$^1\text{H NMR}$  (400 MHz,  $\text{DMSO-}d_6$ ):  $\delta$  = 8.04 (d,  $J$  = 6.5 Hz, 1H), 7.85 – 7.78 (m, 4H), 7.51 (dd,  $J$  = 7.8, 1.6 Hz, 2H), 7.44 – 7.38 (m, 3H), 7.30 – 7.24 (m, 5H), 5.57 (d,  $J$  = 6.5 Hz, 1H), 5.18 (dd,  $J$  = 56.4, 12.6 Hz, 2H), 1.88 (s, 3H);  $^{13}\text{C NMR}$  (100 MHz,  $\text{DMSO-}d_6$ ):  $\delta$  = 170.9, 167.1, 165.6, 136.4, 136.2, 134.6, 131.0, 129.1, 128.9, 128.7, 128.3, 128.1, 123.1, 66.5, 59.0, 40.6, 16.2; HRMS (ESI):  $m/z$   $[\text{M}+\text{H}]^+$  calcd for  $\text{C}_{25}\text{H}_{22}\text{N}_3\text{O}_4^+$ : 428.1605; found: 428.1607.

**allyl (*E*)-2-(*N'*-(1,3-dioxoisindolin-2-yl)acetimidamido)-2-phenylacetate (3r)**

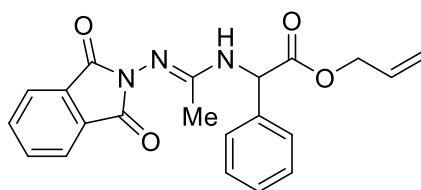

Yellow oil, yield: 60%

$^1\text{H NMR}$  (400 MHz,  $\text{DMSO-}d_6$ ):  $\delta$  = 8.01 (d,  $J$  = 6.7 Hz, 1H), 7.80 (s, 4H), 7.51 (dd,  $J$  = 8.1, 1.4 Hz, 2H), 7.45 – 7.39 (m, 3H), 5.88 (ddd,  $J$  = 21.2, 10.6, 5.3 Hz, 1H), 5.54 (d,  $J$  = 6.7 Hz, 1H), 5.15 (ddd,  $J$  = 13.1, 10.5, 8.5 Hz, 2H), 4.61 (ddt,  $J$  = 5.5, 2.8, 1.6 Hz, 2H), 1.86 (s, 3H);  $^{13}\text{C NMR}$  (100 MHz,  $\text{DMSO-}d_6$ ):  $\delta$  = 170.6, 167.0, 165.6, 136.3, 134.5, 132.8, 131.0, 129.1, 128.4, 123.1, 118.0, 65.5, 58.8, 39.6, 16.2; HRMS (ESI):  $m/z$   $[\text{M}+\text{H}]^+$  calcd for  $\text{C}_{21}\text{H}_{20}\text{N}_3\text{O}_4^+$ : 378.1448; found: 378.1459.

**butyl (*E*)-1-((1,3-dioxoisindolin-2-yl)imino)ethylglycinate (3s)**

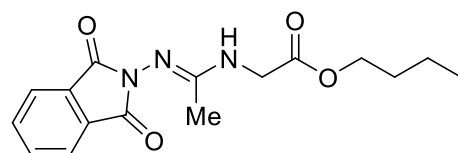

Yellow oil, yield: 56%

$^1\text{H NMR}$  (400 MHz,  $\text{CDCl}_3$ ):  $\delta$  = 7.79 (s, 4H), 7.69 (s, 1H), 4.09 (t,  $J$  = 6.6 Hz, 2H), 4.00 (d,  $J$  = 5.9 Hz, 2H), 1.79 (s, 3H), 1.62 – 1.55 (m, 2H), 1.35 (dq,  $J$  = 14.7, 7.4 Hz, 3H), 0.88 (t,  $J$  = 7.4 Hz, 3H);  $^{13}\text{C NMR}$  (100 MHz,  $\text{DMSO-}d_6$ ):  $\delta$  = 170.1, 167.2, 165.7, 134.5, 131.0, 123.1, 64.8, 43.2, 30.6, 19.0, 16.4, 14.0; HRMS (ESI):  $m/z$   $[\text{M}+\text{H}]^+$  calcd for  $\text{C}_{16}\text{H}_{20}\text{N}_3\text{O}_4^+$ : 318.1448; found: 318.1453.

**ethyl (*E*)-3-((1,3-dioxoisindolin-2-yl)imino)ethylglycinate (3t)**

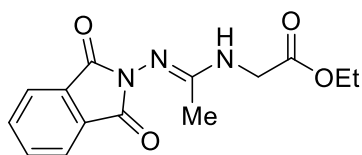

White oil, yield: 69%

$^1\text{H NMR}$  (400 MHz,  $\text{DMSO-}d_6$ ):  $\delta$  = 7.79 (d,  $J$  = 5.3 Hz, 4H), 7.67 (s, 1H), 4.13 (q,  $J$  = 7.1 Hz, 2H), 3.99 (d,  $J$  = 5.8 Hz, 2H), 1.79 (s, 3H), 1.23 (s, 3H);  $^{13}\text{C NMR}$  (100 MHz,  $\text{DMSO-}d_6$ ):  $\delta$  = 170.0, 167.3, 165.7, 134.5, 131.0, 123.1, 60.8, 55.3, 43.3, 16.4, 14.5; HRMS (ESI):  $m/z$   $[\text{M}+\text{H}]^+$  calcd for  $\text{C}_{14}\text{H}_{16}\text{N}_3\text{O}_4^+$ : 290.1135; found: 290.1137.

**ethyl (*E*)-3-((1,3-dioxoisindolin-2-yl)imino)-2-hydroxy-2-phenylpropanoate (4a)**

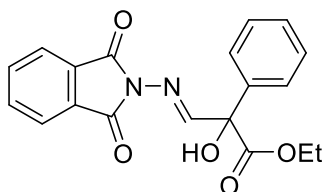

Yellow oil, yield: 70%

$^1\text{H NMR}$  (400 MHz,  $\text{DMSO-}d_6$ ):  $\delta$  = 9.03 (s, 1H), 7.93 – 7.86 (m, 4H), 7.57 – 7.53 (m, 2H), 7.44 – 7.34 (m, 3H), 6.90 (s, 1H), 4.25 – 4.14 (m, 2H), 1.20 (t,  $J$  = 7.1 Hz, 3H);  $^{13}\text{C NMR}$  (100 MHz,  $\text{DMSO-}d_6$ ):  $\delta$  = 171.2, 164.8, 162.3, 139.6, 135.4, 130.3, 128.6, 128.6, 126.7, 123.9, 79.4, 62.0, 14.3; HRMS (ESI):  $m/z$   $[\text{M}+\text{Na}]^+$  calcd for  $\text{C}_{19}\text{H}_{16}\text{N}_2\text{NaO}_5^+$ : 375.0951; found: 375.0952.

**ethyl (*E*)-3-((1,3-dioxoisindolin-2-yl)imino)-2-hydroxy-2-(*o*-tolyl)propanoate (4b)**

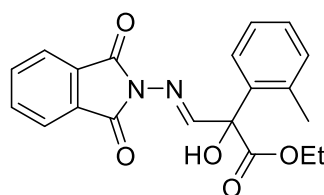

White oil, yield: 76%

$^1\text{H NMR}$  (400 MHz,  $\text{DMSO-}d_6$ ):  $\delta$  = 9.04 (s, 1H), 7.95 – 7.86 (m, 4H), 7.47 (d,  $J$  = 7.6 Hz, 1H), 7.24 (dt,  $J$  = 13.7, 5.0 Hz, 3H), 6.76 (s, 1H), 4.28 – 4.15 (m, 2H), 2.31 (s, 3H), 1.20 (t,  $J$  = 7.1 Hz, 3H);  $^{13}\text{C NMR}$  (100 MHz,  $\text{DMSO-}d_6$ ):  $\delta$  = 171.4, 164.8, 162.5, 138.4, 137.1, 135.4, 132.1, 130.3, 128.5, 127.4, 125.8, 123.9, 80.3, 61.9, 20.4, 14.3; HRMS (ESI):  $m/z$   $[\text{M}+\text{Na}]^+$  calcd for  $\text{C}_{20}\text{H}_{18}\text{N}_2\text{NaO}_5^+$ : 389.1108; found: 389.1115.

**ethyl (*E*)-3-((1,3-dioxoisindolin-2-yl)imino)-2-hydroxy-2-(*p*-tolyl)propanoate (4c)**

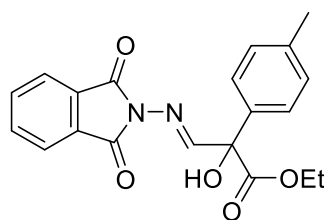

White oil, yield: 75%

$^1\text{H NMR}$  (400 MHz,  $\text{DMSO-}d_6$ ):  $\delta$  = 9.00 (s, 1H), 7.94 – 7.87 (m, 4H), 7.42 (d,  $J$  = 8.2 Hz, 2H), 7.21 (d,  $J$  = 8.0 Hz, 2H), 6.78 (s, 1H), 4.18 (dd,  $J$  = 10.4, 7.1 Hz, 2H), 2.31 (s, 3H), 1.20 (t,  $J$  = 7.1 Hz, 3H);  $^{13}\text{C NMR}$  (100 MHz,  $\text{DMSO-}d_6$ ):  $\delta$  = 171.2, 164.8, 162.5, 137.9, 136.7, 135.4, 130.3, 129.2, 126.5, 123.9, 79.2, 61.9, 21.0, 14.3; HRMS (ESI):  $m/z$   $[\text{M}+\text{Na}]^+$  calcd for  $\text{C}_{20}\text{H}_{18}\text{NaN}_2\text{O}_5^+$ : 389.1108; found: 389.1093.

**ethyl (*E*)-3-((1,3-dioxoisindolin-2-yl)imino)-2-hydroxy-2-(*p*-tolyl)propanoate (4d)**

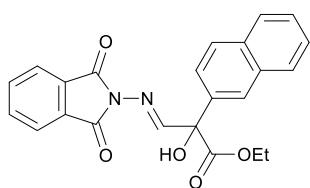

White oil, yield: 57%

$^1\text{H}$  NMR (400 MHz, DMSO- $d_6$ ):  $\delta$  = 9.21 (s, 1H), 8.30 – 8.25 (m, 1H), 7.93 (tdd,  $J$  = 5.2, 4.4, 2.5 Hz, 6H), 7.72 – 7.69 (m, 1H), 7.52 (dt,  $J$  = 7.1, 2.9 Hz, 3H), 7.10 (s, 1H), 4.22 – 4.08 (m, 2H), 1.09 (t,  $J$  = 7.1 Hz, 3H);  $^{13}\text{C}$  NMR (100 MHz, DMSO- $d_6$ ):  $\delta$  = 171.7, 164.8, 162.4, 136.2, 135.5, 134.4, 131.0, 130.4, 129.7, 129.1, 126.5, 126.2, 125.8, 125.5, 125.2, 124.0, 80.6, 61.9, 14.3; HRMS (ESI):  $m/z$   $[\text{M}+\text{K}]^+$  calcd for  $\text{C}_{23}\text{H}_{18}\text{KN}_2\text{O}_5^+$ : 441.0847; found: 441.0832.

**ethyl (E)-3-((1,3-dioxoisoindolin-2-yl)imino)-2-(2-fluorophenyl)-2-hydroxypropanoate (4e)**

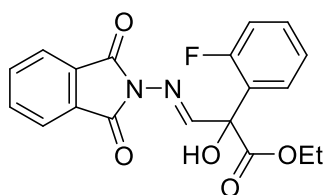

White oil, yield: 63%

$^1\text{H}$  NMR (400 MHz, DMSO- $d_6$ ):  $\delta$  = 9.13 (d,  $J$  = 1.4 Hz, 1H), 7.92 – 7.85 (m, 4H), 7.65 (td,  $J$  = 7.7, 1.6 Hz, 1H), 7.46 – 7.40 (m, 1H), 7.29 – 7.20 (m, 2H), 7.12 (s, 1H), 4.21 (qd,  $J$  = 7.1, 4.0 Hz, 2H), 1.19 (t,  $J$  = 7.1 Hz, 3H);  $^{13}\text{C}$  NMR (100 MHz, DMSO- $d_6$ ):  $\delta$  = 170.5, 164.8, 160.2, 135.4, 130.9, 130.9, 130.2, 128.4, 128.4, 127.5, 127.4, 124.7, 124.6, 123.9, 116.0, 115.8, 77.4, 62.0, 14.2;  $^{19}\text{F}$  NMR (376 MHz, DMSO- $d_6$ ):  $\delta$  = -112.5 – -112.7 (m); HRMS (ESI):  $m/z$   $[\text{M}+\text{Na}]^+$  calcd for  $\text{C}_{19}\text{H}_{15}\text{FN}_2\text{NaO}_5^+$ : 393.0857; found: 393.0865.

**ethyl (E)-2-(2-chlorophenyl)-3-((1,3-dioxoisoindolin-2-yl)imino)-2-hydroxypropanoate (4f)**

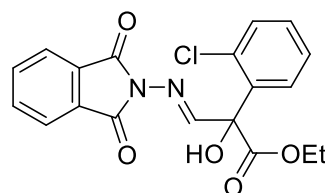

White oil, yield: 80%

$^1\text{H}$  NMR (400 MHz, DMSO- $d_6$ ):  $\delta$  = 9.30 (s, 1H), 7.90 (t,  $J$  = 5.6 Hz, 4H), 7.78 (d,  $J$  = 7.2 Hz, 1H), 7.48 – 7.39 (m, 3H), 7.18 (s, 1H), 4.21 (dd,  $J$  = 7.0, 4.4 Hz, 2), 1.19 (t,  $J$  = 7.1 Hz, 3H);  $^{13}\text{C}$  NMR (100 MHz, DMSO- $d_6$ ):  $\delta$  = 170.2, 164.8, 160.2, 137.9, 135.4, 132.1, 130.4, 130.3, 130.2, 128.9, 127.4, 123.9, 78.8, 62.0, 14.2; HRMS (ESI):  $m/z$   $[\text{M}+\text{Na}]^+$  calcd for  $\text{C}_{19}\text{H}_{15}\text{ClN}_2\text{NaO}_5^+$ : 409.0562; found: 409.0572.

**ethyl (E)-3-((1,3-dioxoisoindolin-2-yl)imino)-2-hydroxy-2-(2-iodophenyl)propanoate (4g)**

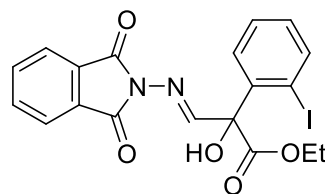

White oil, yield: 49%

$^1\text{H}$  NMR (400 MHz, DMSO- $d_6$ ):  $\delta$  = 9.39 (s, 1H), 7.94 – 7.86 (m, 5H), 7.69 (dd,  $J$  = 7.8, 1.3 Hz, 1H), 7.46 (t,  $J$  = 7.6 Hz, 1H), 7.15 – 7.06 (m, 2H), 4.26 – 4.15 (m, 2H), 1.23 (t,  $J$  = 7.1 Hz, 3H);  $^{13}\text{C}$  NMR (100 MHz, DMSO- $d_6$ ):  $\delta$  = 170.0, 164.8, 160.5, 142.6, 141.2, 135.5, 130.2, 129.4, 128.1, 124.0, 97.2, 81.2, 62.0, 14.2; HRMS (ESI):  $m/z$   $[\text{M}+\text{Na}]^+$  calcd for  $\text{C}_{19}\text{H}_{15}\text{IN}_2\text{NaO}_5^+$ : 500.9918; found: 500.9917.

**ethyl (E)-2-(3-chlorophenyl)-3-((1,3-dioxoisoindolin-2-yl)imino)-2-**

**hydroxypropanoate (4h)**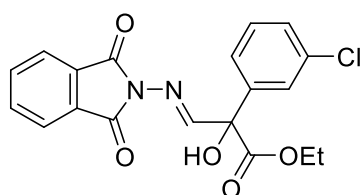

White oil, yield: 57%

$^1\text{H NMR}$  (400 MHz,  $\text{DMSO-}d_6$ ):  $\delta$  = 8.99 (s, 1H), 7.90 (dq,  $J$  = 8.9, 4.3 Hz, 4H), 7.58 (s, 1H), 7.46 (dt,  $J$  = 14.1, 7.1 Hz, 3H), 7.15 (s, 1H), 4.20 (dd,  $J$  = 13.8, 6.9 Hz, 2H), 1.20 (d,  $J$  = 7.0 Hz, 3H);  $^{13}\text{C NMR}$  (100 MHz,  $\text{DMSO-}d_6$ ):  $\delta$  = 170.6, 164.8, 161.5, 141.9, 135.4, 135.4, 133.4, 130.5, 130.3, 128.6, 125.6, 124.0, 79.1, 62.2, 14.3; HRMS (ESI):  $m/z$   $[\text{M}+\text{Na}]^+$  calcd for  $\text{C}_{19}\text{H}_{15}\text{ClN}_2\text{NaO}_5^+$ : 409.0562; found: 409.0571.

**ethyl (E)-3-((1,3-dioxoisindolin-2-yl)imino)-2-(4-fluorophenyl)-2-hydroxypropanoate (4i)**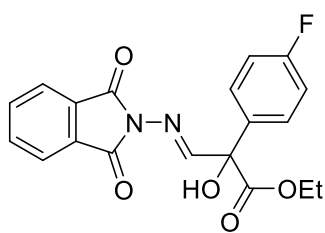

White oil, yield: 59%

$^1\text{H NMR}$  (400 MHz,  $\text{DMSO-}d_6$ ):  $\delta$  = 8.99 (s, 1H), 7.93 – 7.86 (m, 4H), 7.58 (dd,  $J$  = 8.7, 5.5 Hz, 2H), 7.25 (t,  $J$  = 8.9 Hz, 2H), 7.02 (s, 1H), 4.19 (qd,  $J$  = 7.2, 3.6 Hz, 2H), 1.21 (t,  $J$  = 7.1 Hz, 3H);  $^{13}\text{C NMR}$  (100 MHz,  $\text{DMSO-}d_6$ ):  $\delta$  = 164.8, 162.0, 135.7, 135.4, 130.3, 129.0, 128.9, 123.9, 115.5, 115.3, 79.0, 62.1, 14.3;  $^{19}\text{F NMR}$  (376 MHz,  $\text{DMSO-}d_6$ ):  $\delta$  = -114.3; HRMS (ESI):  $m/z$   $[\text{M}+\text{Na}]^+$  calcd for  $\text{C}_{19}\text{H}_{15}\text{FN}_2\text{NaO}_5^+$ : 393.0857; found: 393.0865.

**ethyl (E)-2-(4-bromophenyl)-3-((1,3-dioxoisindolin-2-yl)imino)-2-hydroxypropanoate (4j)**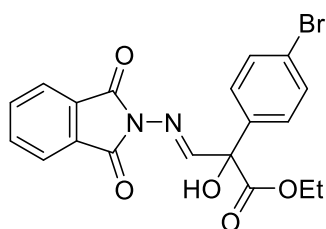

White oil, yield: 53%

$^1\text{H NMR}$  (400 MHz,  $\text{DMSO-}d_6$ ):  $\delta$  = 8.98 (s, 1H), 7.92 – 7.86 (m, 4H), 7.62 (d,  $J$  = 8.5 Hz, 2H), 7.49 (d,  $J$  = 8.6 Hz, 2H), 7.08 (s, 1H), 4.25 – 4.15 (m, 2H), 1.21 (t,  $J$  = 7.1 Hz, 3H);  $^{13}\text{C NMR}$  (100 MHz,  $\text{DMSO-}d_6$ ):  $\delta$  = 170.7, 164.8, 161.6, 138.9, 135.4, 131.5, 130.3, 129.0, 123.9, 122.0, 79.1, 62.1, 14.3; HRMS (ESI):  $m/z$   $[\text{M}+\text{Na}]^+$  calcd for  $\text{C}_{19}\text{H}_{15}\text{BrN}_2\text{NaO}_5^+$ : 453.0057; found: 453.0050.

**ethyl (E)-2-(2,4-dichlorophenyl)-3-((1,3-dioxoisindolin-2-yl)imino)-2-hydroxypropanoate (4k)**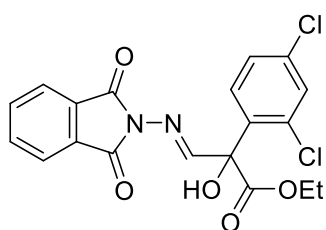

White oil, yield: 72%

$^1\text{H NMR}$  (400 MHz,  $\text{DMSO-}d_6$ ):  $\delta$  = 9.29 (s, 1H), 7.92 – 7.87 (m, 4H), 7.79 (d,  $J$  = 8.5 Hz, 1H), 7.63 (d,  $J$  = 2.1 Hz, 1H), 7.52 (dd,  $J$  = 8.5, 2.2 Hz, 1H), 7.39 (s, 1H), 4.21 (dd,  $J$  = 7.1, 5.2 Hz, 2H), 1.19 (t,  $J$  = 7.1 Hz, 3H);  $^{13}\text{C NMR}$  (100 MHz,  $\text{DMSO-}d_6$ ):  $\delta$  = 169.9, 164.8, 159.5, 137.2, 135.5, 134.0, 130.3, 130.2, 129.8, 127.5, 125.2, 124.0, 78.5, 62.1, 14.2; HRMS (ESI):  $m/z$   $[\text{M}+\text{NH}_4]^+$  calcd for  $\text{C}_{19}\text{H}_{18}\text{Cl}_2\text{N}_3\text{O}_5^+$ : 438.0618; found: 438.0610.

**benzyl (E)-3-((1,3-dioxoisindolin-2-yl)imino)-2-hydroxy-2-phenylpropanoate (4l)**

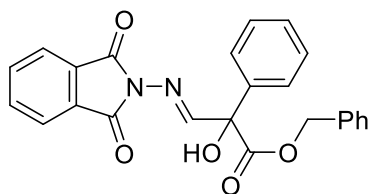

White oil, yield: 42%

$^1\text{H}$  NMR (400 MHz,  $\text{DMSO-}d_6$ ):  $\delta$  = 9.07 (d,  $J$  = 0.6 Hz, 1H), 7.95 – 7.87 (m, 4H), 7.55 (d,  $J$  = 7.5 Hz, 2H), 7.41 – 7.31 (m, 8H), 7.04 (s, 1H), 5.22 (s, 2H);  $^{13}\text{C}$  NMR (100 MHz,  $\text{DMSO-}d_6$ ):  $\delta$  = 171.1, 164.8, 162.2, 139.5, 136.5, 135.5, 130.3, 128.7, 128.7, 128.4, 128.0, 126.7,

124.0, 79.6, 67.2; HRMS (ESI):  $m/z$   $[\text{M}+\text{Na}]^+$  calcd for  $\text{C}_{24}\text{H}_{18}\text{N}_2\text{NaO}_5^+$ : 437.1108; found: 437.1131.

**allyl (*E*)-3-((1,3-dioxoisindolin-2-yl)imino)-2-hydroxy-2-phenylpropanoate (4m)**

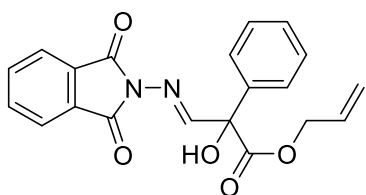

White oil, yield: 60%

$^1\text{H}$  NMR (400 MHz,  $\text{DMSO-}d_6$ ):  $\delta$  = 9.07 (s, 1H), 7.95 – 7.88 (m, 4H), 7.60 – 7.55 (m, 2H), 7.45 – 7.36 (m, 3H), 7.01 (s, 1H), 5.96 – 5.86 (m, 1H), 5.27 – 5.15 (m, 2H), 4.68 (ddd,  $J$  = 5.1, 2.8, 1.4 Hz, 2H);  $^{13}\text{C}$  NMR (100 MHz,  $\text{DMSO-}d_6$ ):  $\delta$  = 170.9, 164.8, 162.1, 139.6, 135.4, 132.5,

130.3, 129.2, 128.7, 126.7, 124.0, 118.1, 79.5, 66.1; HRMS (ESI):  $m/z$   $[\text{M}+\text{Na}]^+$  calcd for  $\text{C}_{20}\text{H}_{16}\text{N}_2\text{NaO}_5^+$ : 387.0951; found: 387.0961.

**isopentyl (*E*)-3-((1,3-dioxoisindolin-2-yl)imino)-2-hydroxy-2-phenylpropanoate (4n)**

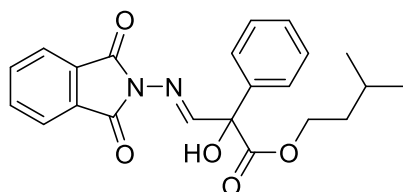

White oil, yield: 57%

$^1\text{H}$  NMR (400 MHz,  $\text{DMSO-}d_6$ ):  $\delta$  = 9.03 (s, 1H), 8.15 – 8.04 (m, 1H), 7.90 (d,  $J$  = 5.2 Hz, 2H), 7.83 (s, 2H), 7.55 (d,  $J$  = 7.1 Hz, 2H), 7.38 (dd,  $J$  = 17.3, 7.2 Hz, 2H), 6.90 (s, 1H), 4.16 (d,  $J$  = 6.2 Hz, 2H), 1.55 (dd,  $J$  = 13.2, 6.6 Hz, 1H), 1.46 (dd,  $J$  = 13.2,

6.6 Hz, 2H), 0.81 (d,  $J$  = 6.4 Hz, 6H);  $^{13}\text{C}$  NMR (100 MHz,  $\text{DMSO-}d_6$ ):  $\delta$  = 171.2, 164.8, 162.4, 136.7, 135.5, 130.3, 128.6, 126.7, 125.2, 124.0, 79.4, 64.3, 37.1, 24.8, 22.6; HRMS (ESI):  $m/z$   $[\text{M}+\text{Na}]^+$  calcd for  $\text{C}_{22}\text{H}_{22}\text{N}_2\text{NaO}_5^+$ : 417.1421; found: 417.1434.

**isobutyl (*E*)-3-((1,3-dioxoisindolin-2-yl)imino)-2-hydroxy-2-phenylpropanoate (4o)**

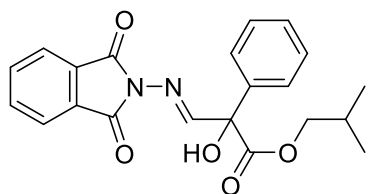

White oil, yield: 64%

$^1\text{H}$  NMR (400 MHz,  $\text{DMSO-}d_6$ ):  $\delta$  = 9.06 (s, 1H), 7.92 – 7.82 (m, 4H), 7.57 (d,  $J$  = 7.2 Hz, 2H), 7.44 – 7.34 (m, 3H), 6.91 (s, 1H), 3.97 – 3.88 (m, 2H), 1.87 (dt,  $J$  = 13.1, 6.5 Hz, 1H), 0.81 (d,  $J$  = 6.5 Hz, 6H);  $^{13}\text{C}$  NMR (100 MHz,  $\text{DMSO-}d_6$ ):  $\delta$  = 171.1, 164.8, 162.3, 139.7, 135.4,

134.7, 130.3, 128.6, 126.6, 123.9, 79.4, 71.5, 27.6, 19.1; HRMS (ESI):  $m/z$   $[\text{M}+\text{Na}]^+$  calcd for  $\text{C}_{21}\text{H}_{20}\text{N}_2\text{NaO}_5^+$ : 409.0562; found: 409.0572.

**ethyl (*E*)-3-((1,3-dioxoisindolin-2-yl)imino)-2-hydroxy-2-(3-(trifluoromethyl)phenyl)propanoate (4q)**

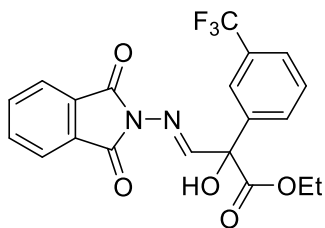

White oil, yield: 30%

$^1\text{H}$  NMR (400 MHz,  $\text{DMSO-}d_6$ ):  $\delta$  = 9.01 (s, 1H), 8.09 (dd,  $J$  = 23.3, 3.0 Hz, 1H), 7.88 (dd,  $J$  = 15.5, 5.7 Hz, 5H), 7.75 (d,  $J$  = 7.5 Hz, 1H), 7.69 (d,  $J$  = 7.8 Hz, 1H), 7.32 (s, 1H), 4.27 – 4.17 (m, 2H), 1.20 (t,  $J$  = 7.1 Hz, 3H);  $^{13}\text{C}$  NMR (100 MHz,  $\text{DMSO-}d_6$ ):  $\delta$  = 170.6, 164.7, 161.5, 140.7, 136.7, 135.4, 131.2, 130.3, 129.7, 129.2, 125.4, 125.4, 125.2, 124.0, 123.3, 79.1, 62.3, 14.2;  $^{19}\text{F}$  NMR (376 MHz,  $\text{DMSO-}d_6$ ):  $\delta$  = -60.8 – -61.3 (m); HRMS (ESI):  $m/z$   $[\text{M}+\text{H}]^+$  calcd for  $\text{C}_{20}\text{H}_{16}\text{F}_3\text{N}_2\text{O}_5^+$ : 421.1006; found: 421.1024.

**ethyl (*E*)-2-(*N'*-(1,3-dioxisoindolin-2-yl)acetimidamido-2,2,2-*d*<sub>3</sub>)-2-phenylacetate (3a')**

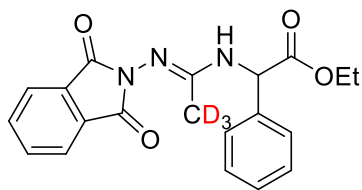

Yellow oil, yield: 74%

$^1\text{H}$  NMR (400 MHz,  $\text{DMSO-}d_6$ ):  $\delta$  = 7.97 (d,  $J$  = 6.7 Hz, 1H), 7.80 (s, 4H), 7.49 (dd,  $J$  = 8.1, 1.3 Hz, 2H), 7.41 (ddt,  $J$  = 9.7, 5.6, 2.2 Hz, 3H), 5.48 (d,  $J$  = 6.7 Hz, 1H), 4.13 (ddd,  $J$  = 25.8, 10.8, 7.1 Hz, 2H), 1.17 (t,  $J$  = 7.1 Hz, 3H).

**ethyl (*E*)-3-((1,3-dioxisoindolin-2-yl)imino)-2-hydroxy-2-phenylpropanoate-3-*d* (4a')**

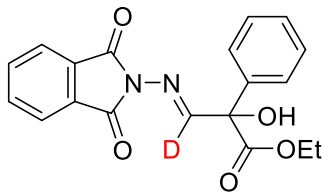

Yellow oil, yield: 72%

$^1\text{H}$  NMR (400 MHz,  $\text{DMSO-}d_6$ ):  $\delta$  = 7.89 (qd,  $J$  = 6.5, 4.3 Hz, 4H), 7.58 – 7.54 (m, 2H), 7.42 (dd,  $J$  = 10.0, 4.8 Hz, 2H), 7.38 – 7.34 (m, 1H), 6.93 (s, 1H), 4.25 – 4.15 (m, 2H), 1.20 (t,  $J$  = 7.1 Hz, 3H).

## 6. NMR Spectra of Compounds

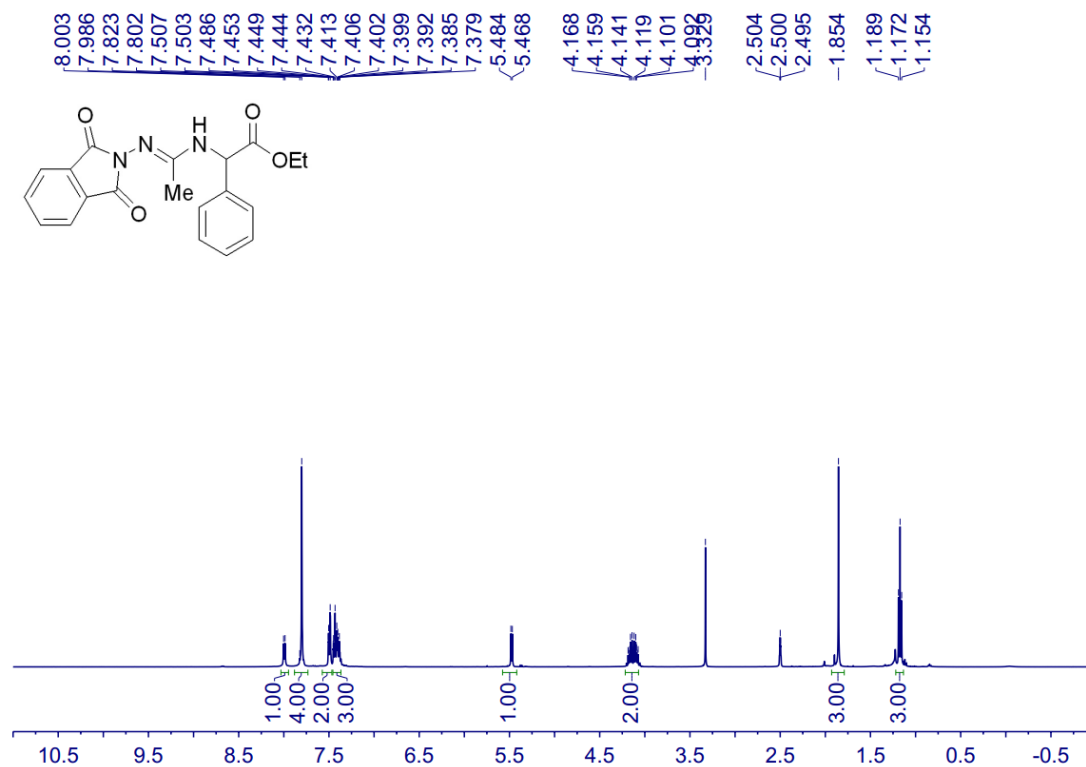

<sup>1</sup>H NMR Spectrum of Compound **3a** (400 MHz, DMSO-*d*<sub>6</sub>).

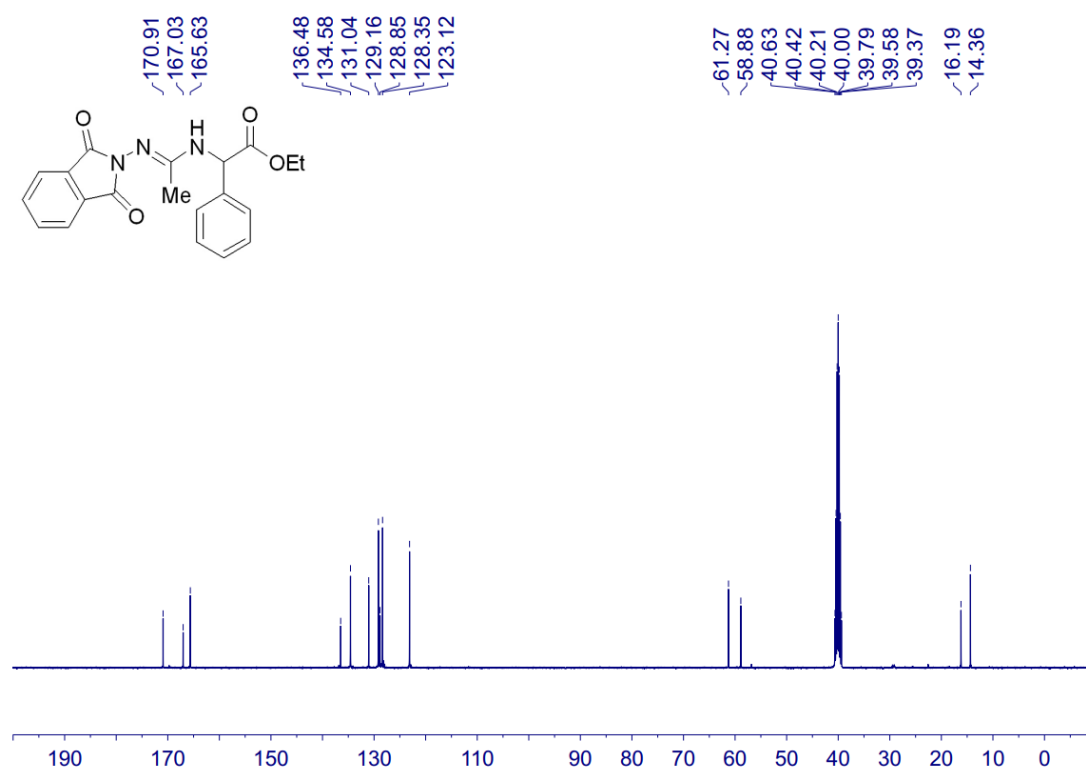

<sup>13</sup>C NMR Spectrum of Compound **3a** (100 MHz, DMSO-*d*<sub>6</sub>).

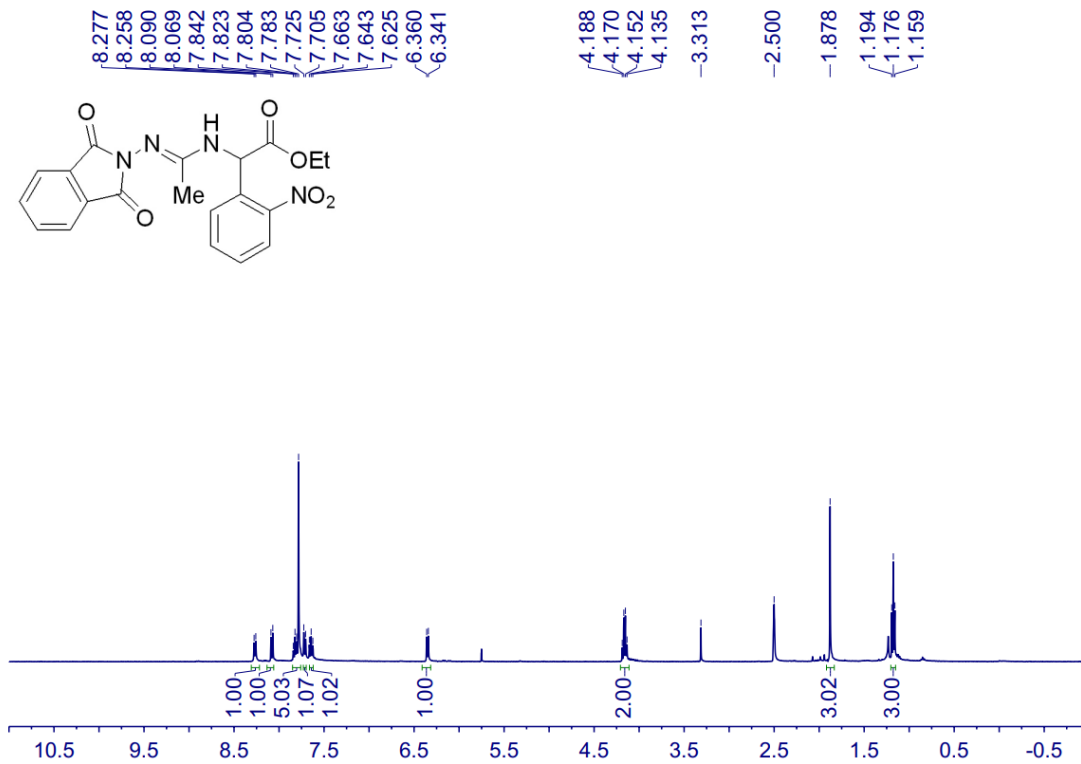

<sup>1</sup>H NMR Spectrum of Compound **3b** (400 MHz, DMSO-*d*<sub>6</sub>)

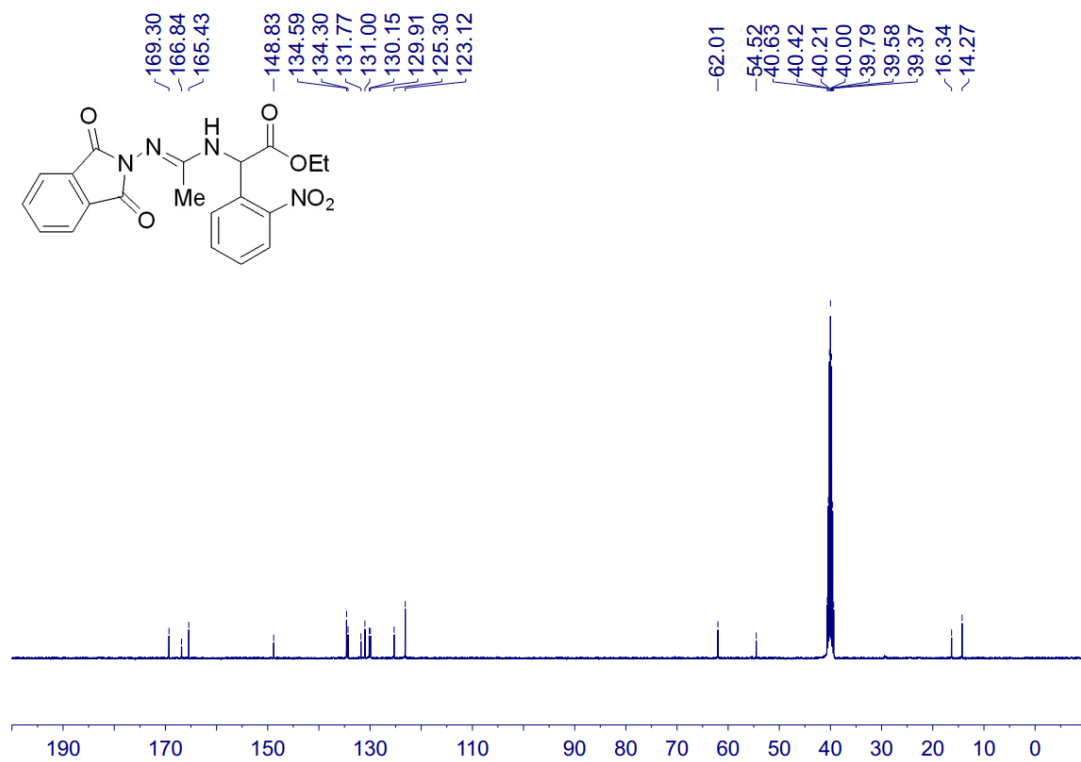

<sup>13</sup>C NMR Spectrum of Compound **3b** (100 MHz, DMSO-*d*<sub>6</sub>)



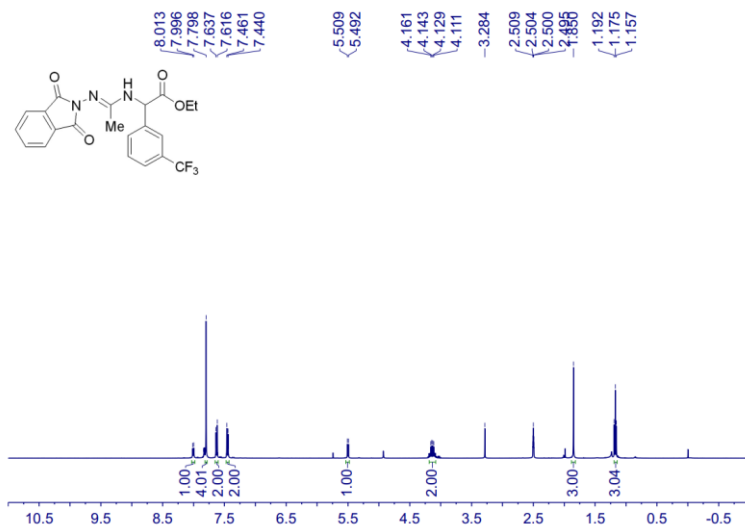

<sup>1</sup>H NMR Spectrum of Compound **3c** (400 MHz, DMSO-*d*<sub>6</sub>)

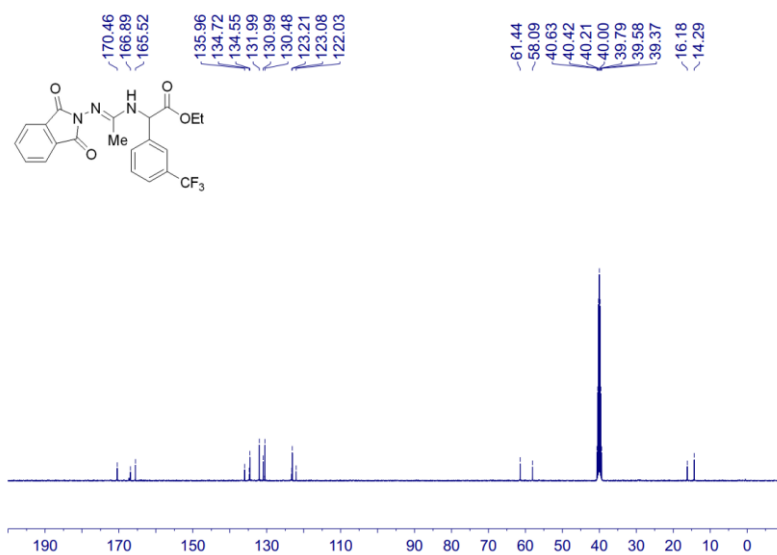

<sup>13</sup>C NMR Spectrum of Compound **3c** (100 MHz, DMSO-*d*<sub>6</sub>)

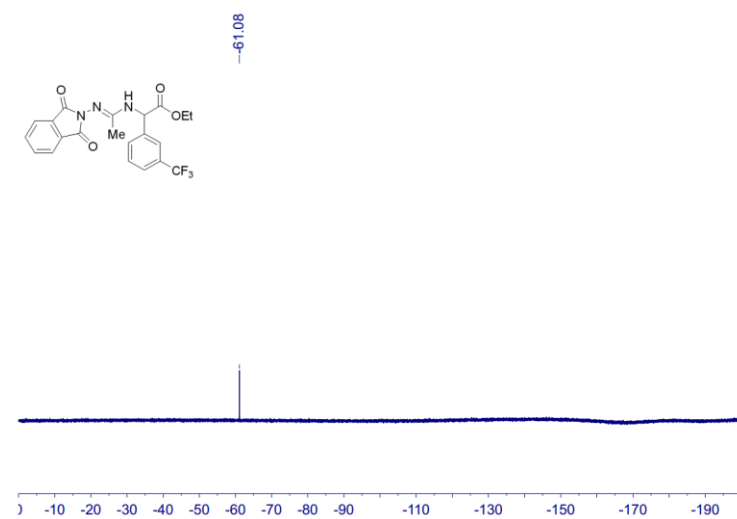

<sup>19</sup>F NMR Spectrum of Compound **3c** (376 MHz, DMSO-*d*<sub>6</sub>)

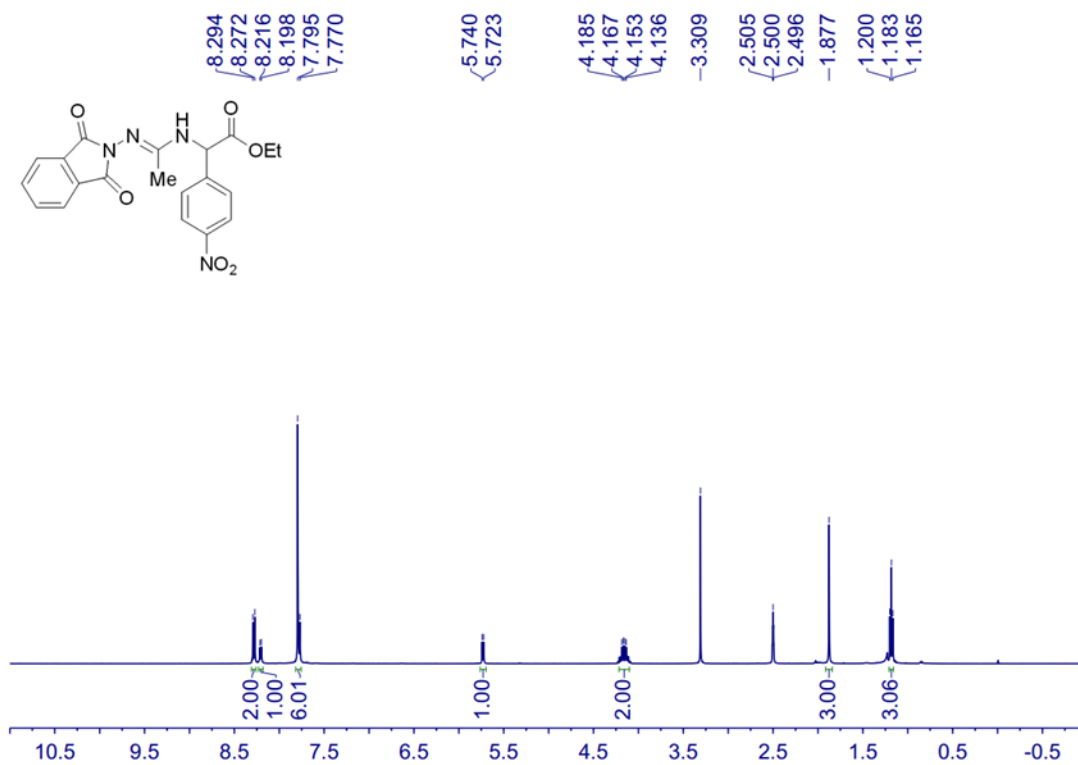

$^1\text{H}$  NMR Spectrum of Compound **3d** (400 MHz, DMSO- $d_6$ )

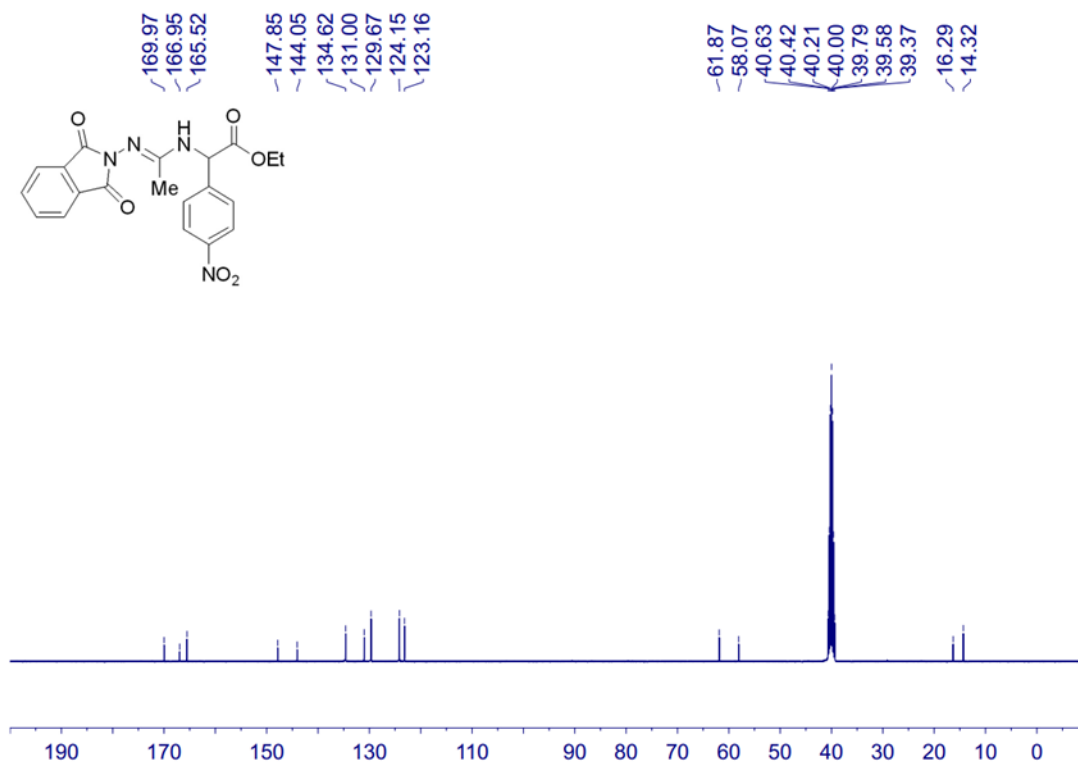

$^{13}\text{C}$  NMR Spectrum of Compound **3d** (100 MHz, DMSO- $d_6$ )

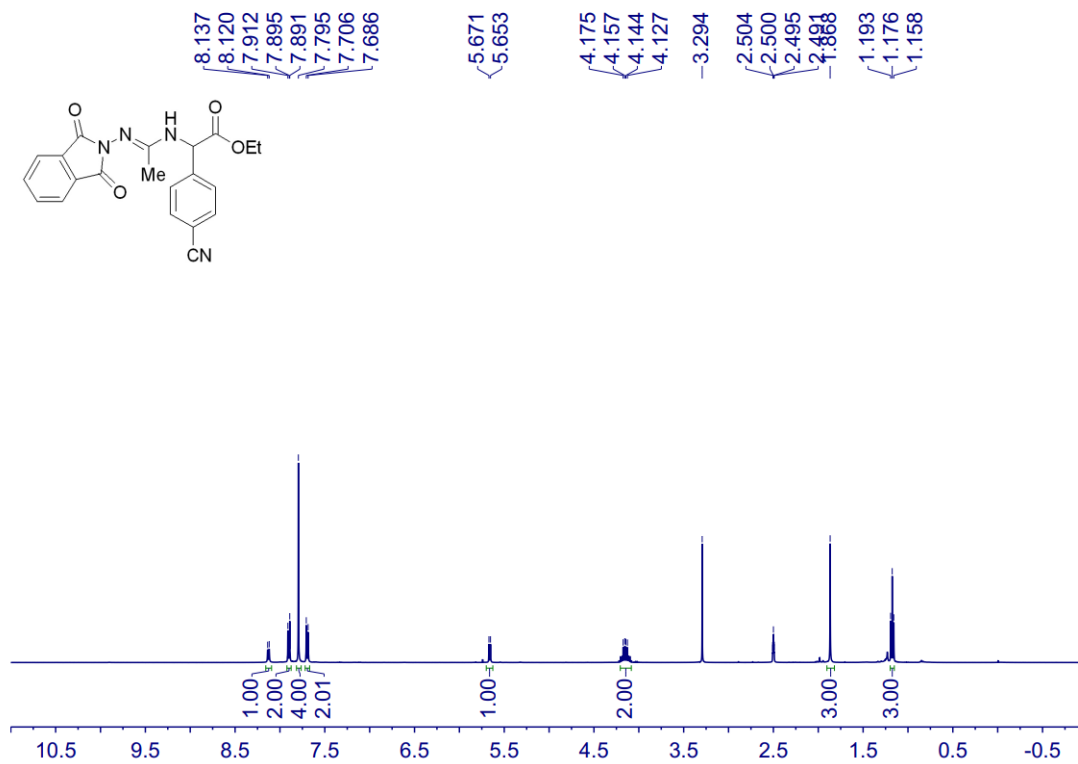

<sup>1</sup>H NMR Spectrum of Compound 3e (400 MHz, DMSO-*d*<sub>6</sub>)

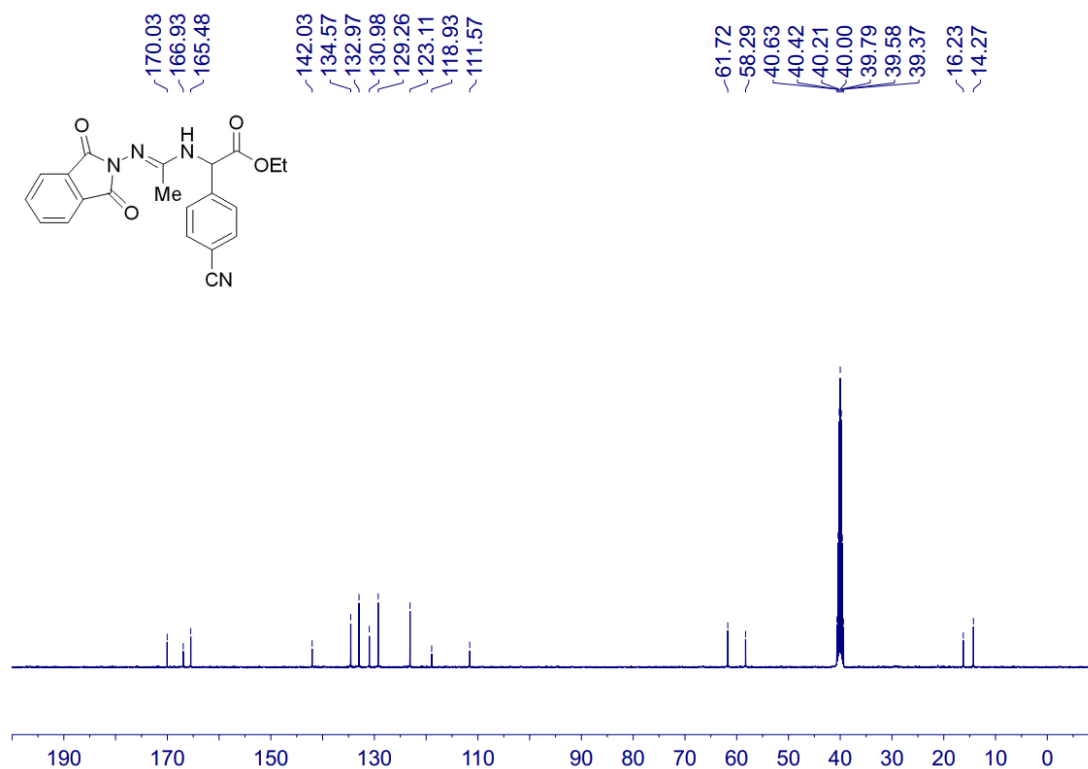

<sup>13</sup>C NMR Spectrum of Compound 3e (100 MHz, DMSO-*d*<sub>6</sub>)

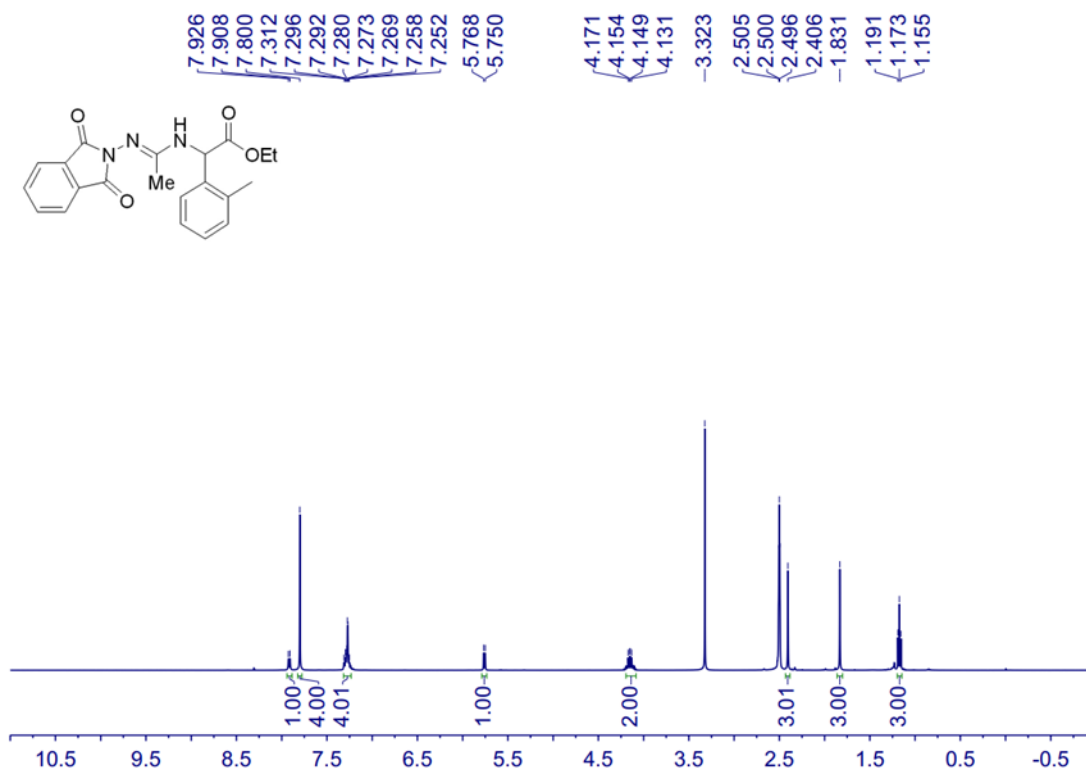

<sup>1</sup>H NMR Spectrum of Compound **3f** (400 MHz, DMSO-*d*<sub>6</sub>)

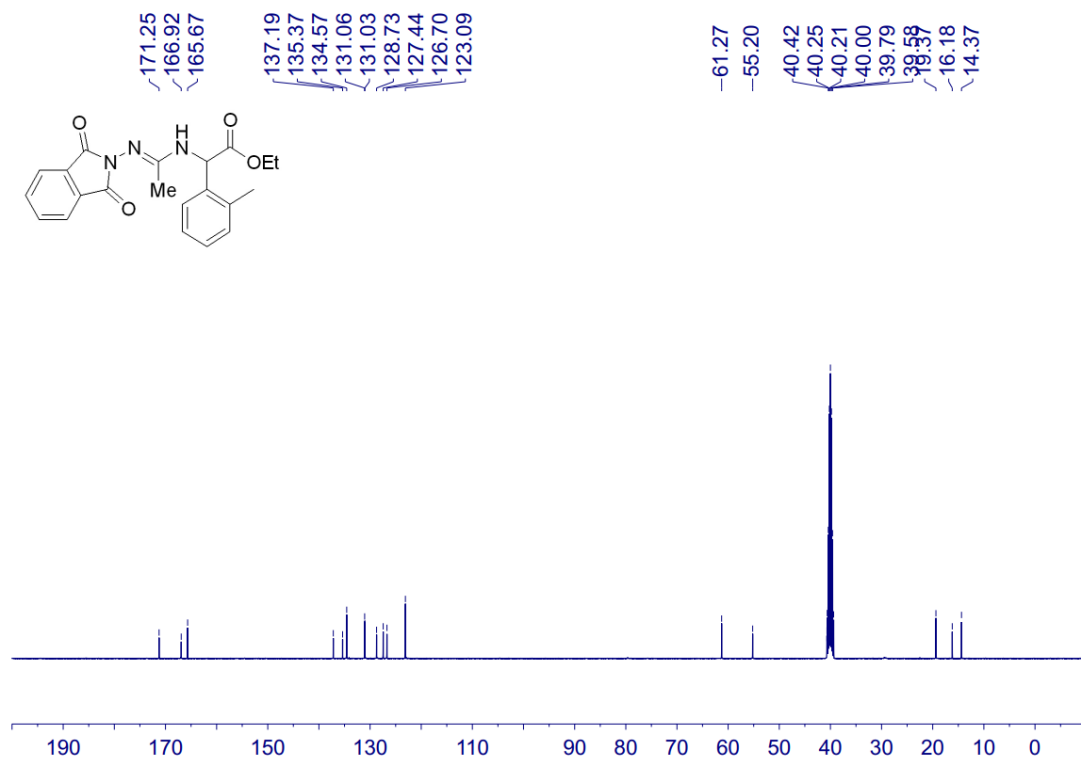

<sup>13</sup>C NMR Spectrum of Compound **3f** (100 MHz, DMSO-*d*<sub>6</sub>)

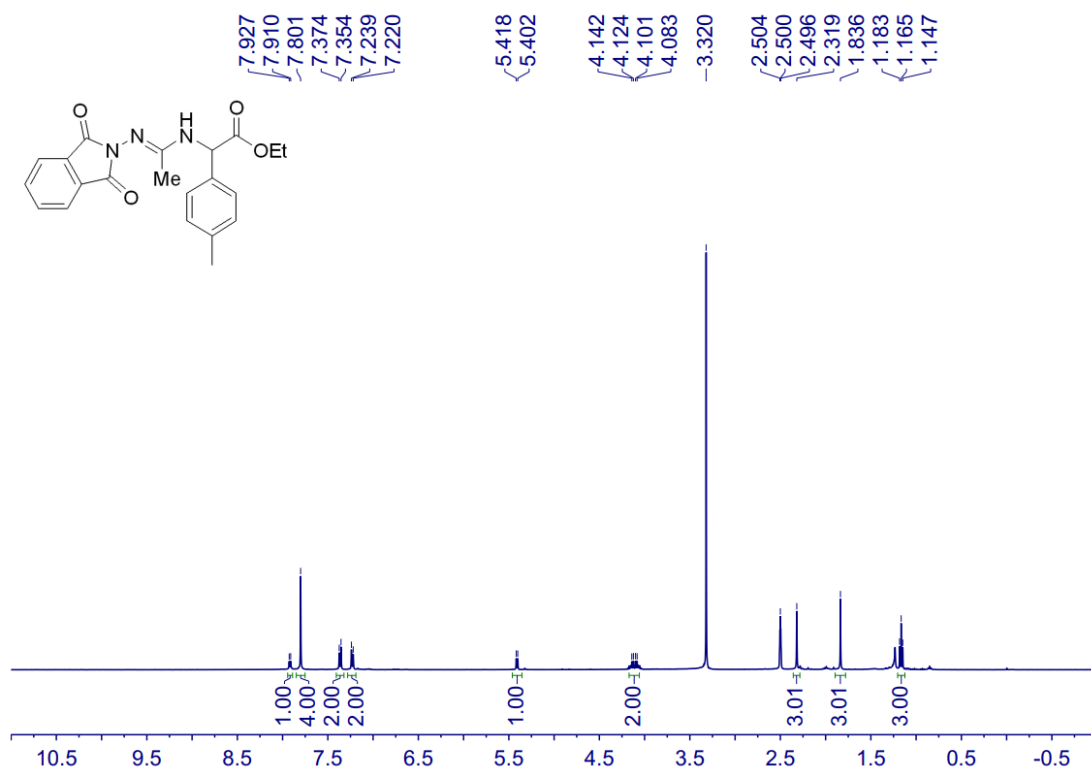

<sup>1</sup>H NMR Spectrum of Compound **3g** (400 MHz, DMSO-*d*<sub>6</sub>)

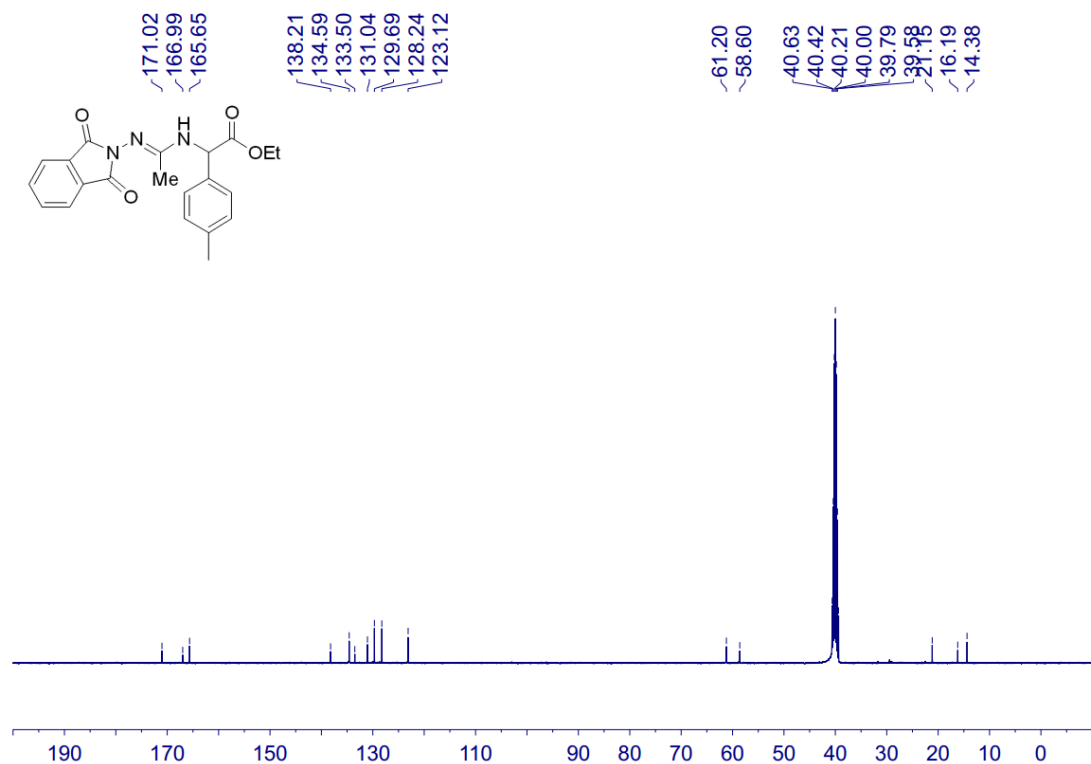

<sup>13</sup>C NMR Spectrum of Compound **3g** (100 MHz, DMSO-*d*<sub>6</sub>)

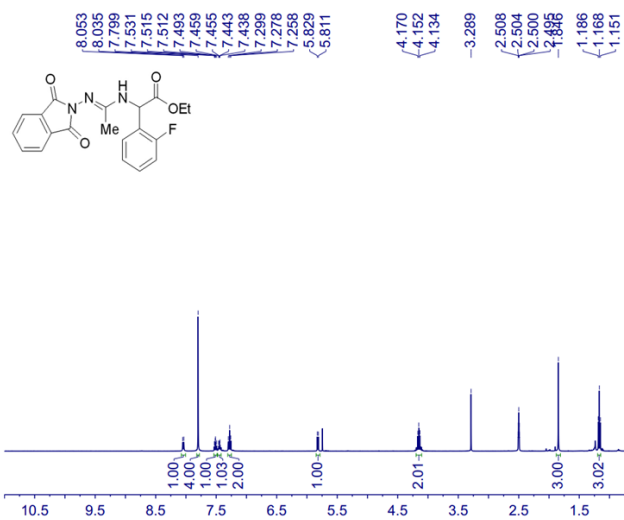

<sup>1</sup>H NMR Spectrum of Compound **3h** (400 MHz, DMSO-*d*<sub>6</sub>)

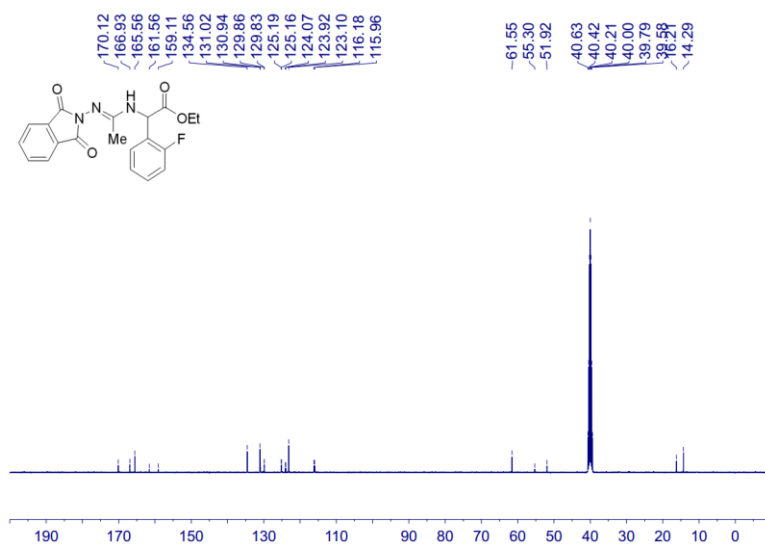

<sup>13</sup>C NMR Spectrum of Compound **3h** (100 MHz, DMSO-*d*<sub>6</sub>)

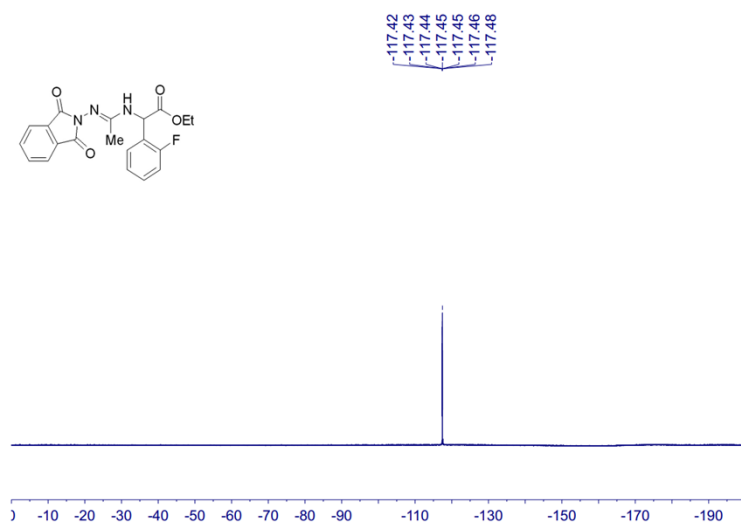

<sup>19</sup>F NMR Spectrum of Compound **3h** (376 MHz, DMSO-*d*<sub>6</sub>)

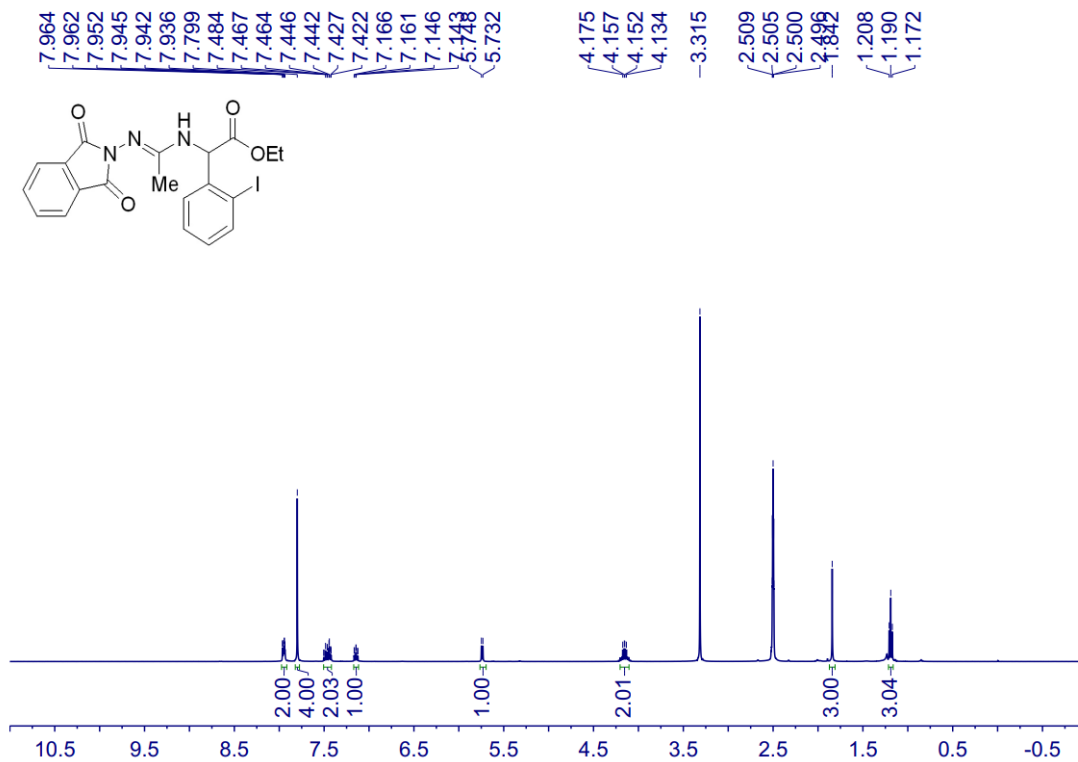

<sup>1</sup>H NMR Spectrum of Compound **3i** (400 MHz, CDCl<sub>3</sub>)

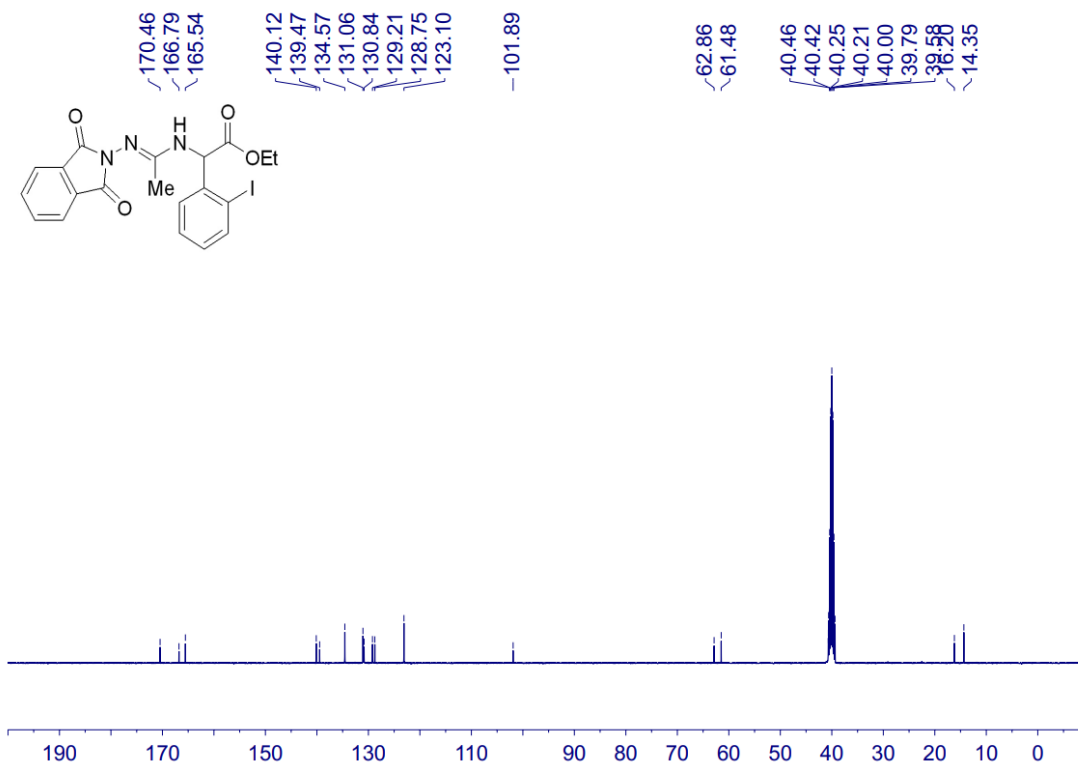

<sup>13</sup>C NMR Spectrum of Compound **3i** (100 MHz, DMSO-*d*<sub>6</sub>)

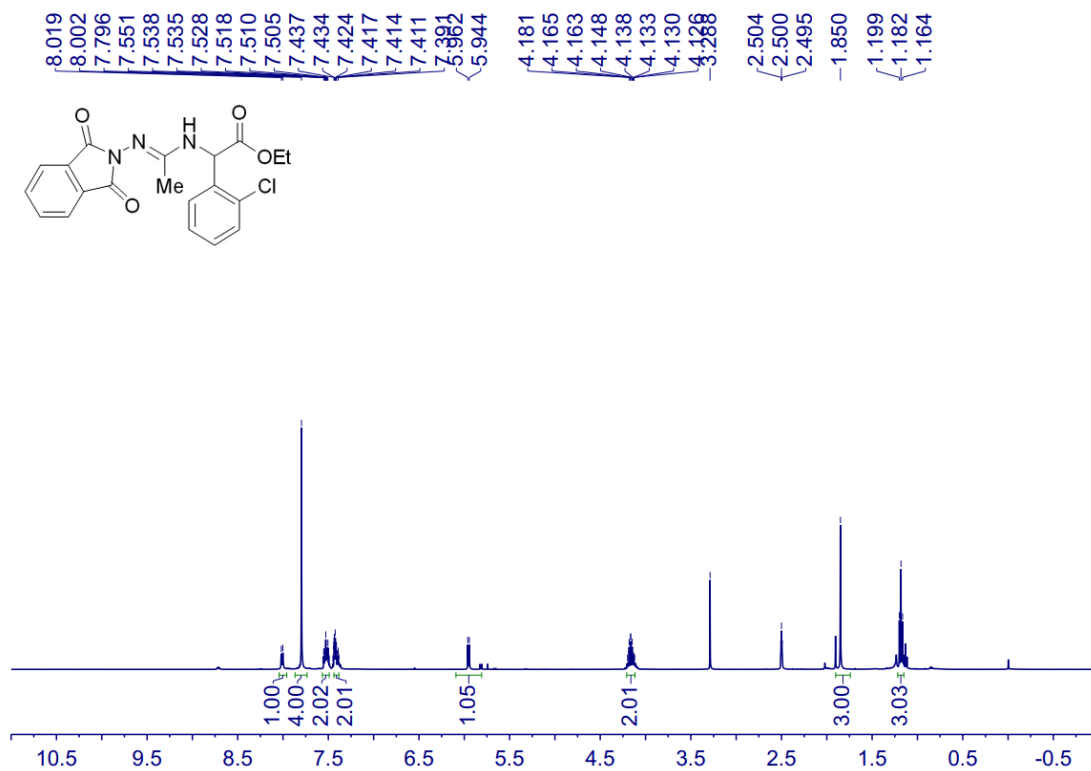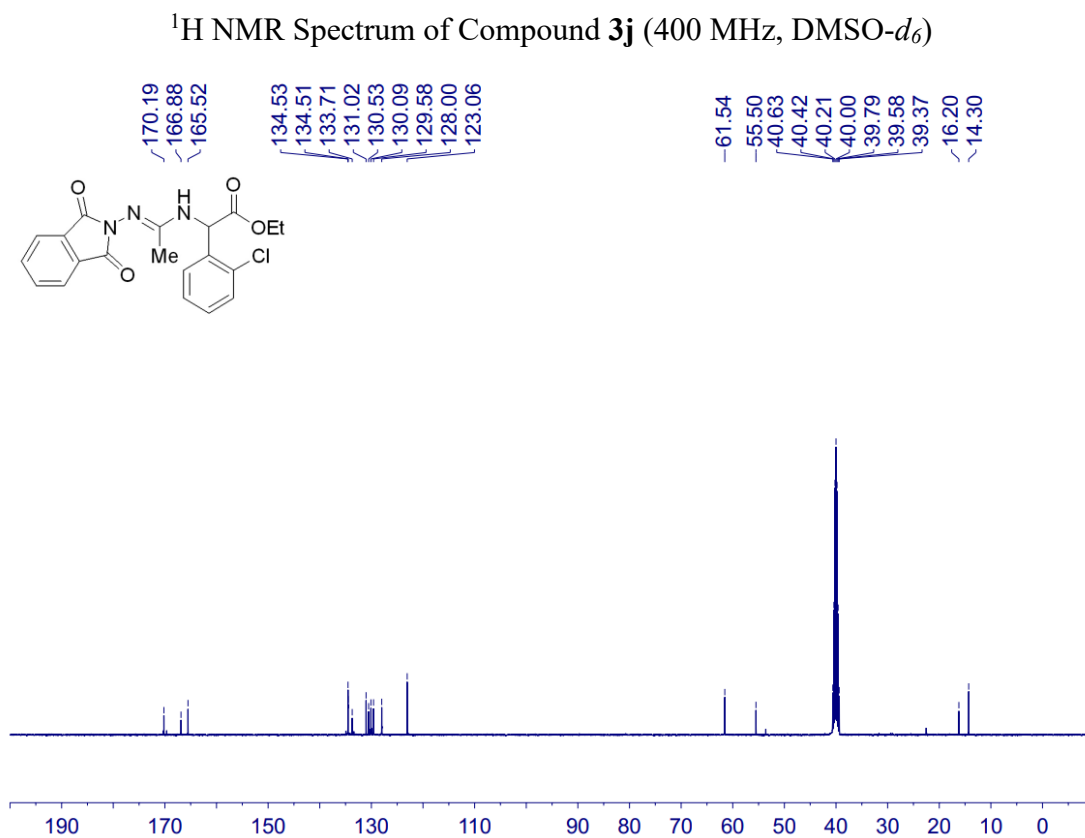



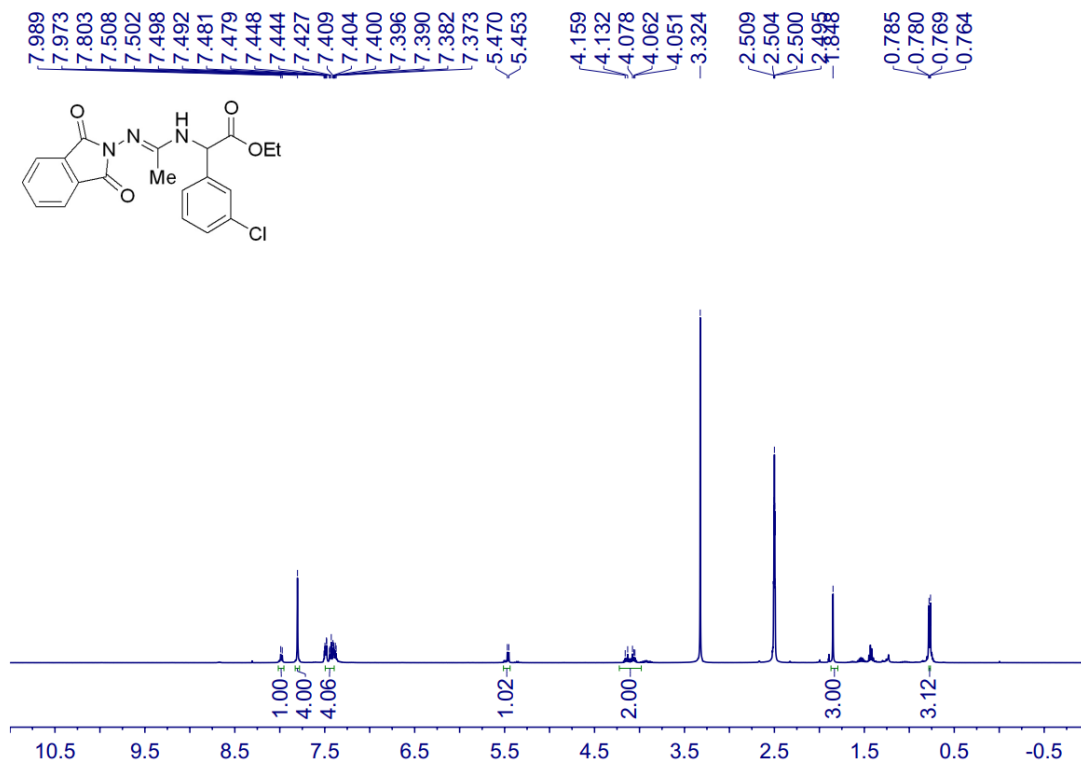

<sup>1</sup>H NMR Spectrum of Compound **3k** (400 MHz, DMSO-*d*<sub>6</sub>)

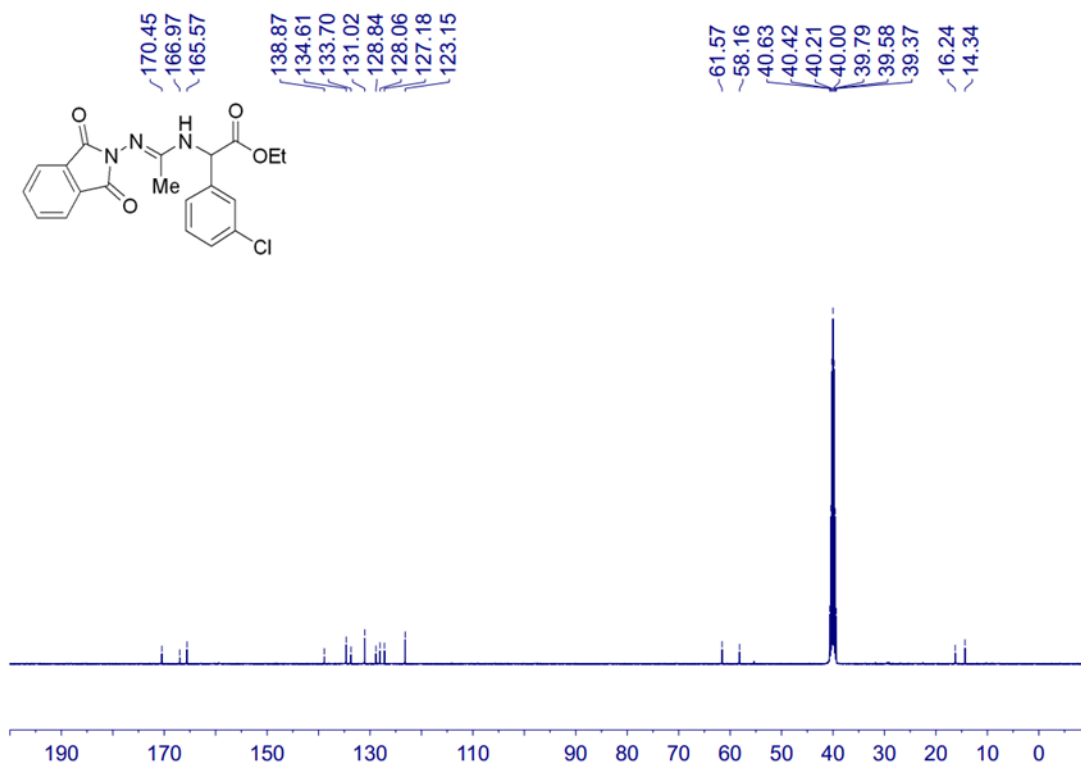

<sup>13</sup>C NMR Spectrum of Compound **3k** (100 MHz, DMSO-*d*<sub>6</sub>)

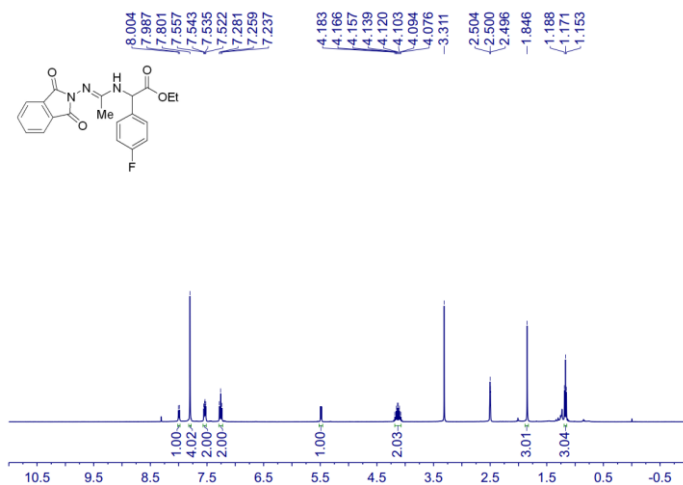

**<sup>1</sup>H NMR Spectrum of Compound 31 (400 MHz, DMSO-*d*<sub>6</sub>)**

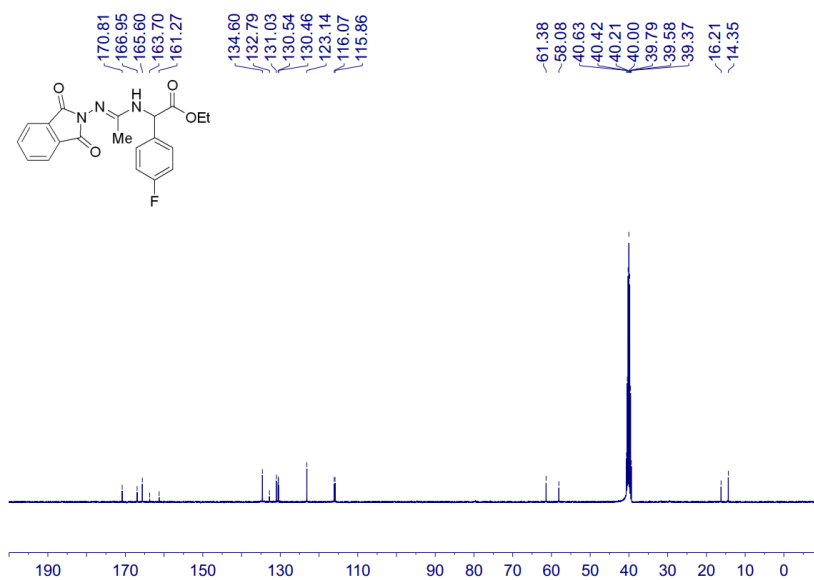

**<sup>13</sup>C NMR Spectrum of Compound 31 (100 MHz, DMSO-*d*<sub>6</sub>)**

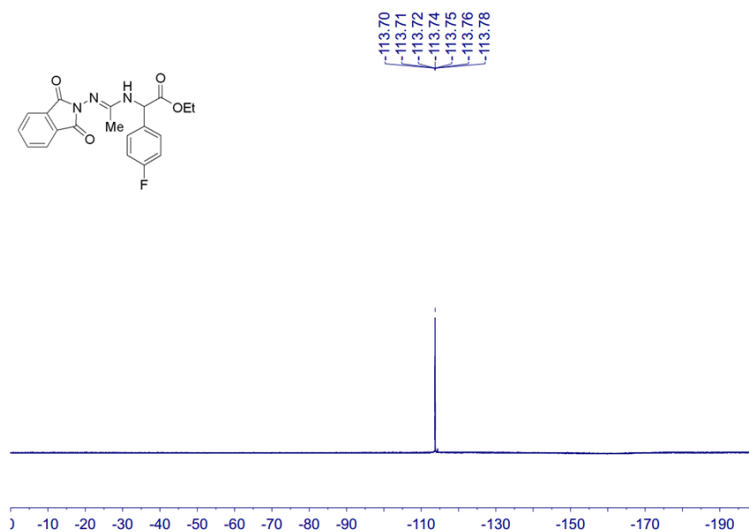

**<sup>19</sup>F NMR Spectrum of Compound 31 (376 MHz, DMSO-*d*<sub>6</sub>)**

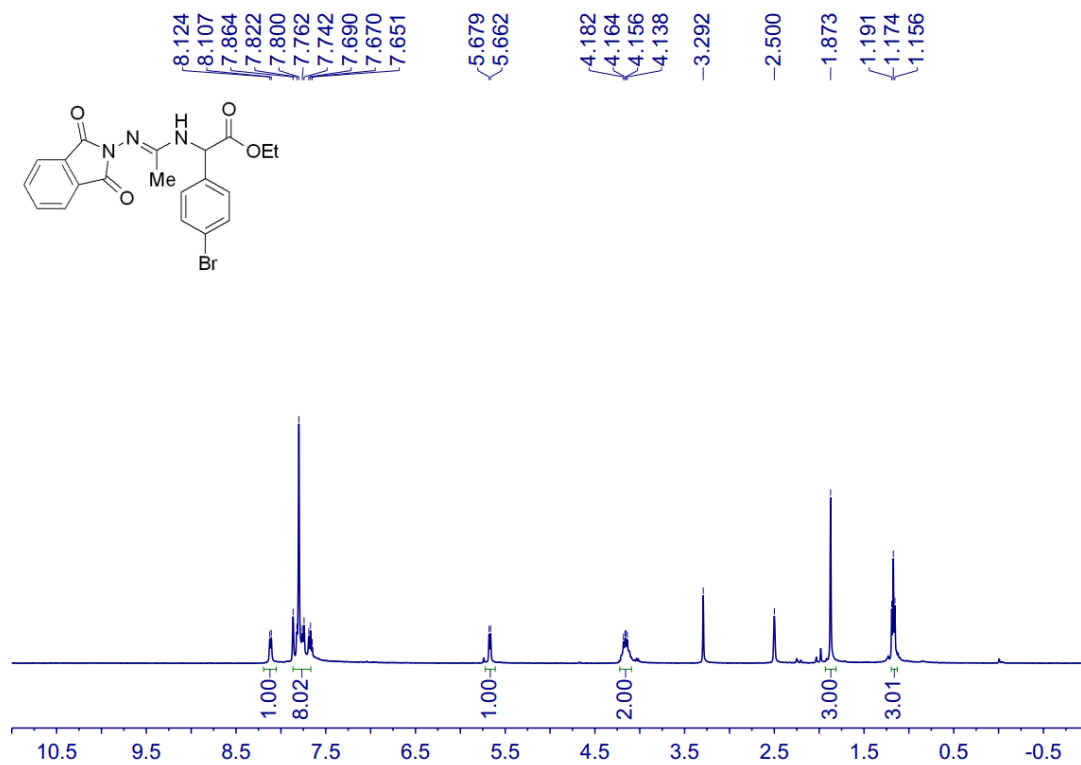

<sup>1</sup>H NMR Spectrum of Compound **3m** (400 MHz, DMSO-*d*<sub>6</sub>)

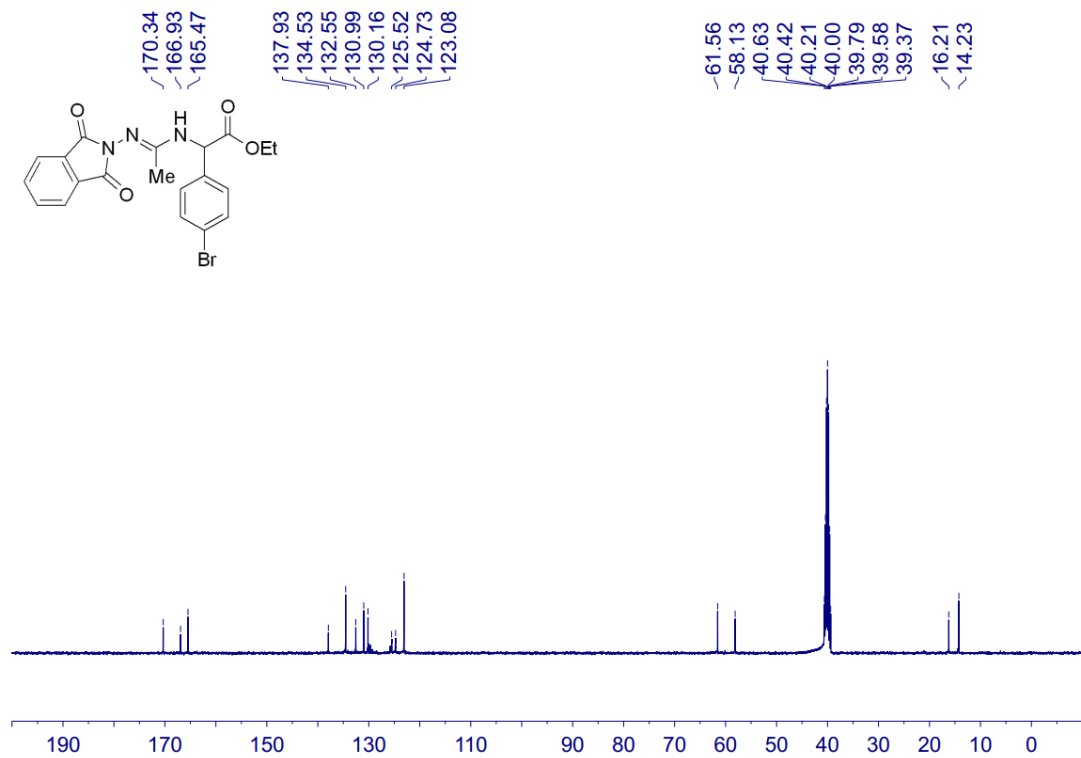

<sup>13</sup>C NMR Spectrum of Compound **3m** (100 MHz, DMSO-*d*<sub>6</sub>)

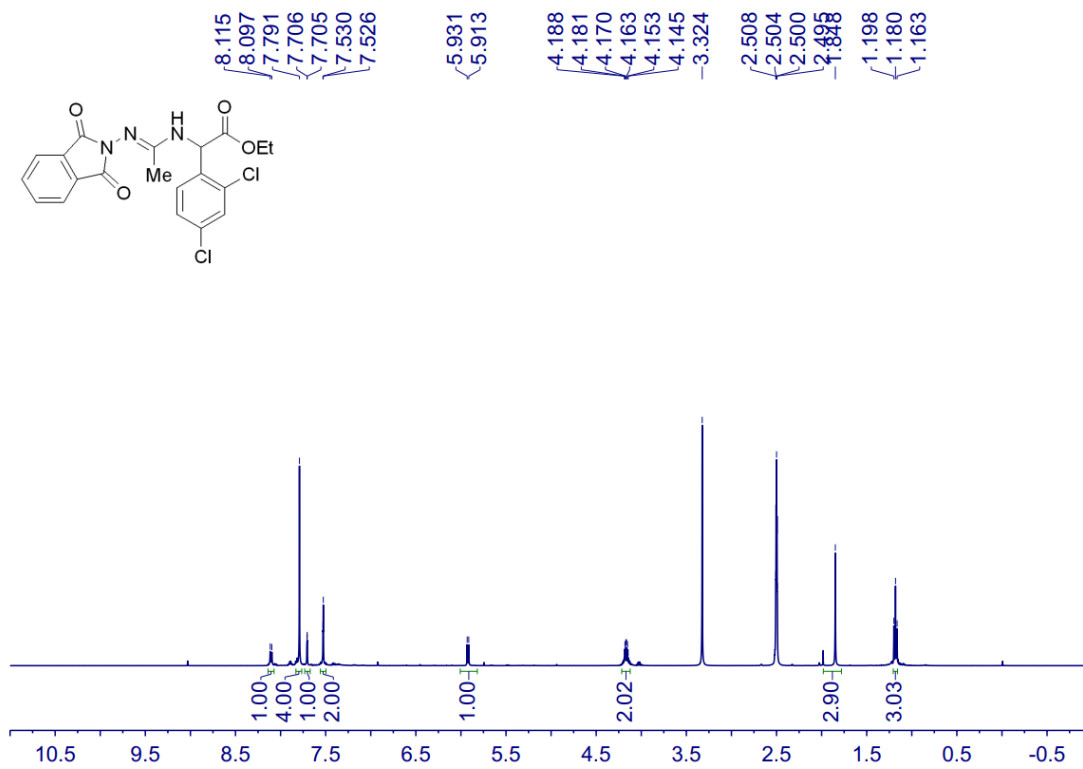

$^1\text{H}$  NMR Spectrum of Compound **3n** (400 MHz,  $\text{DMSO-}d_6$ )

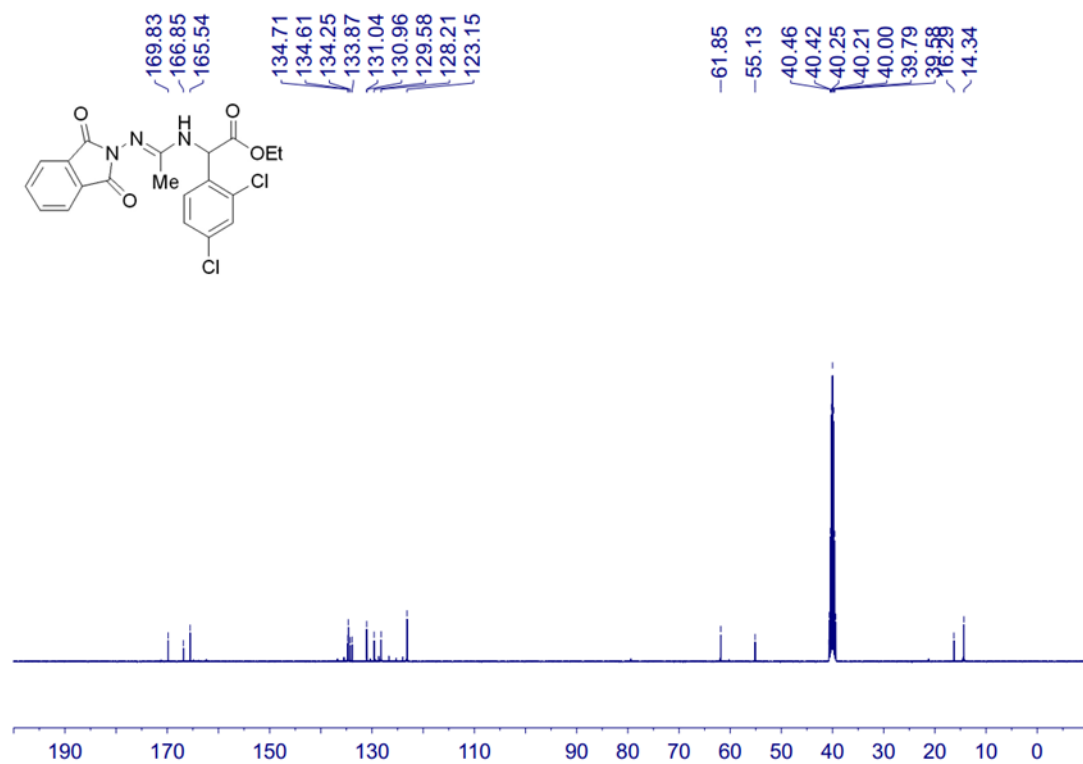

$^{13}\text{C}$  NMR Spectrum of Compound **3n** (100 MHz,  $\text{DMSO-}d_6$ )

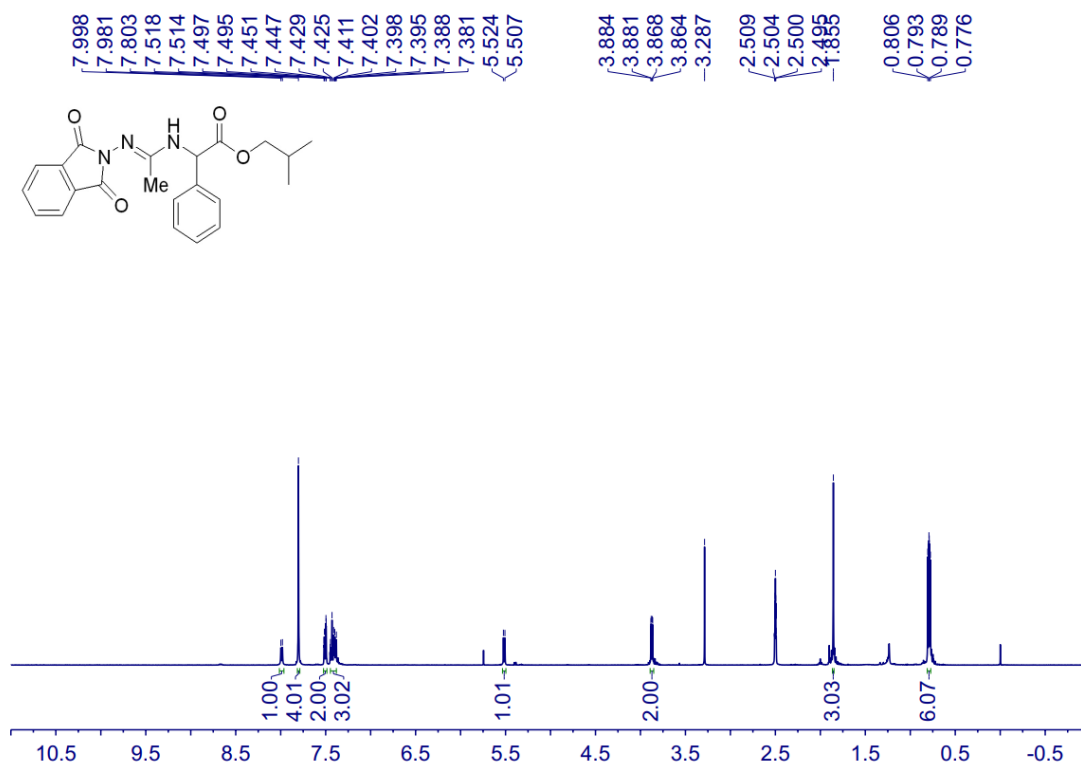

<sup>1</sup>H NMR Spectrum of Compound **3o** (400 MHz, DMSO-*d*<sub>6</sub>)

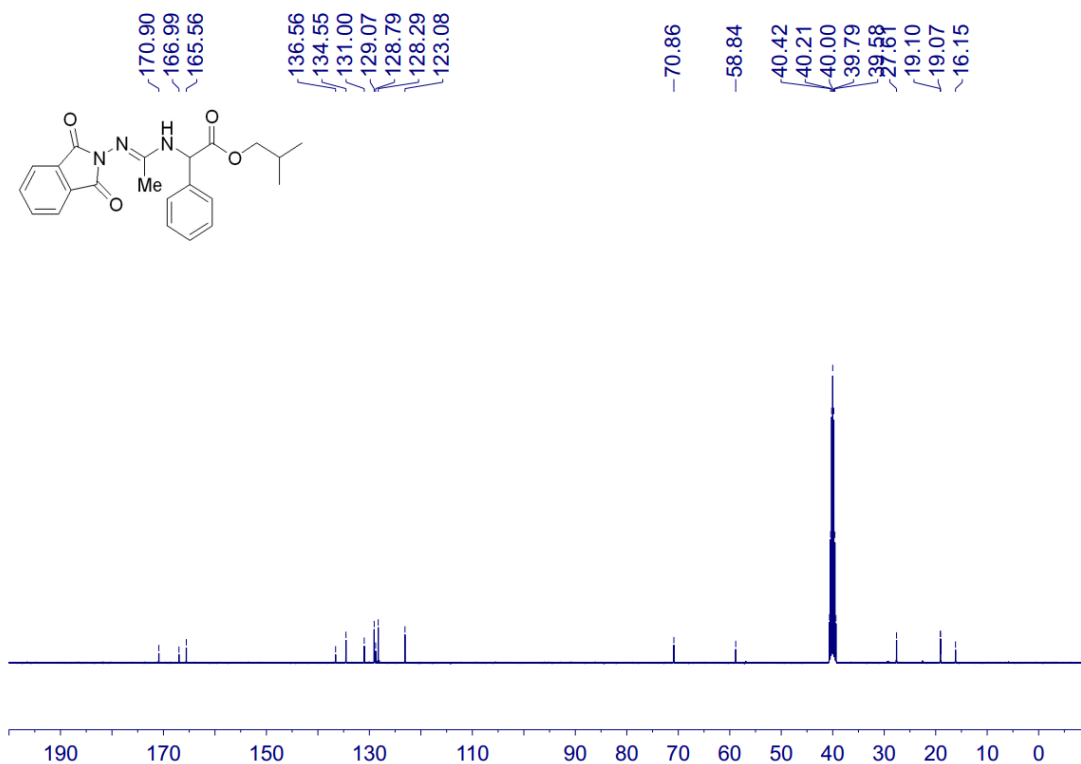

<sup>13</sup>C NMR Spectrum of Compound **3o** (100 MHz, DMSO-*d*<sub>6</sub>)

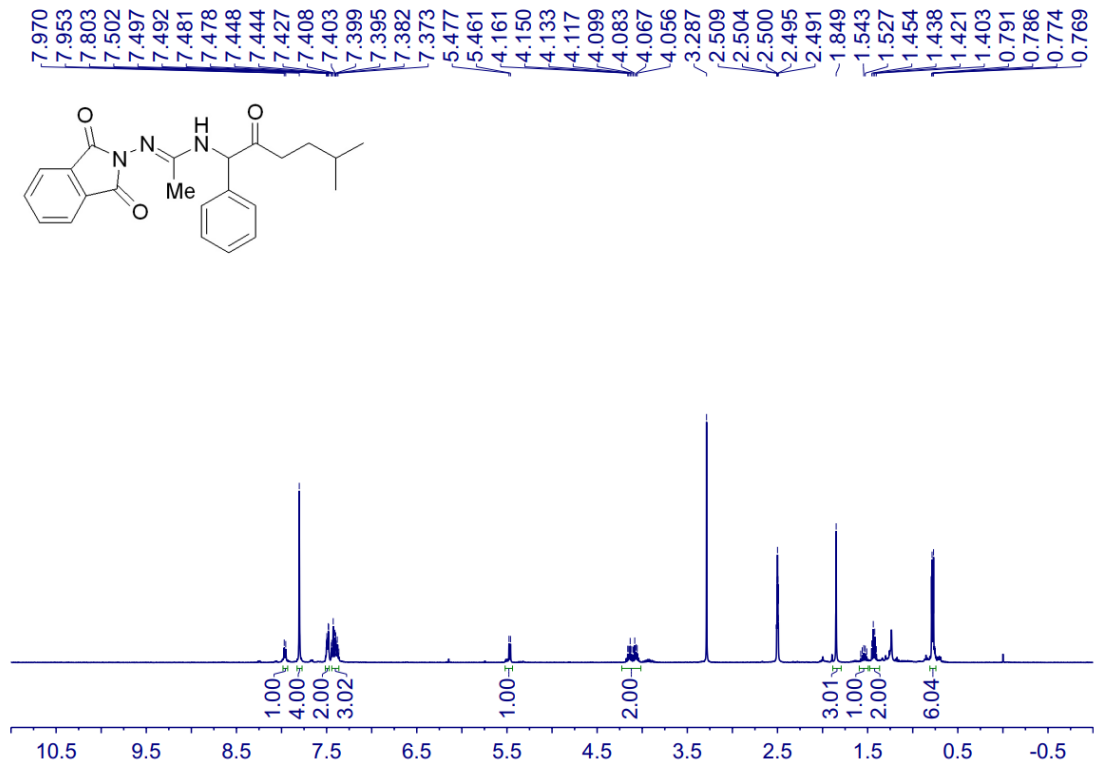

$^1\text{H}$  NMR Spectrum of Compound **3p** (400 MHz,  $\text{DMSO-}d_6$ )

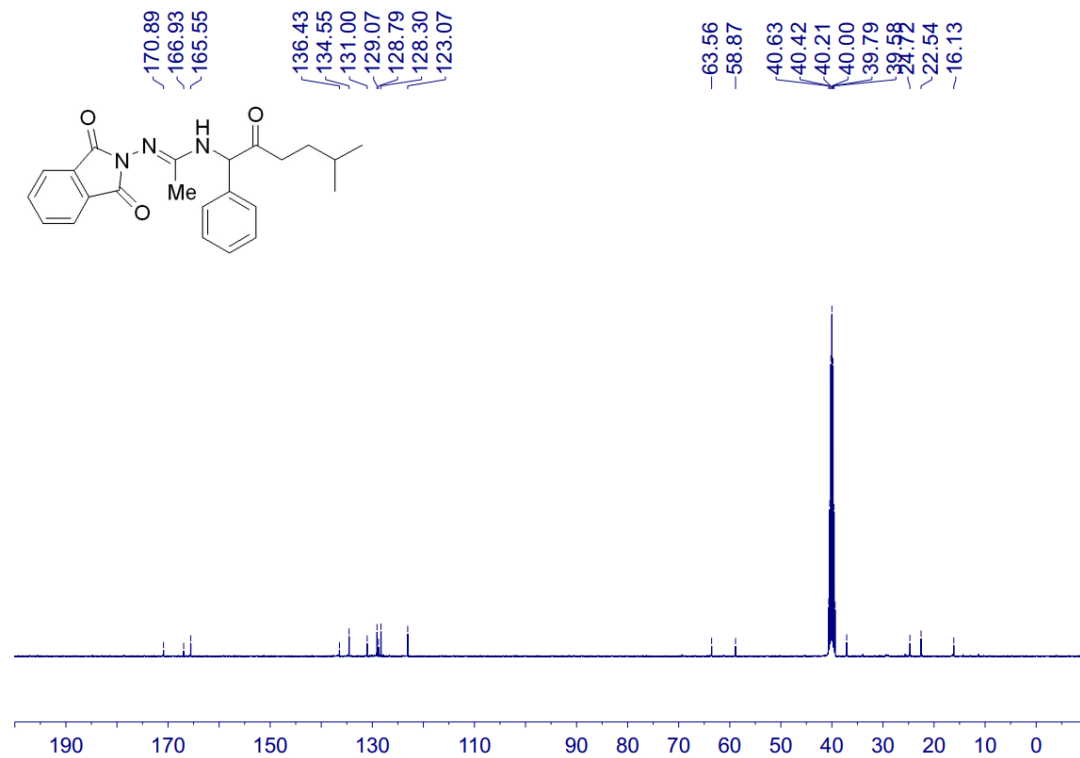

$^{13}\text{C}$  NMR Spectrum of Compound **3p** (100 MHz,  $\text{DMSO-}d_6$ )

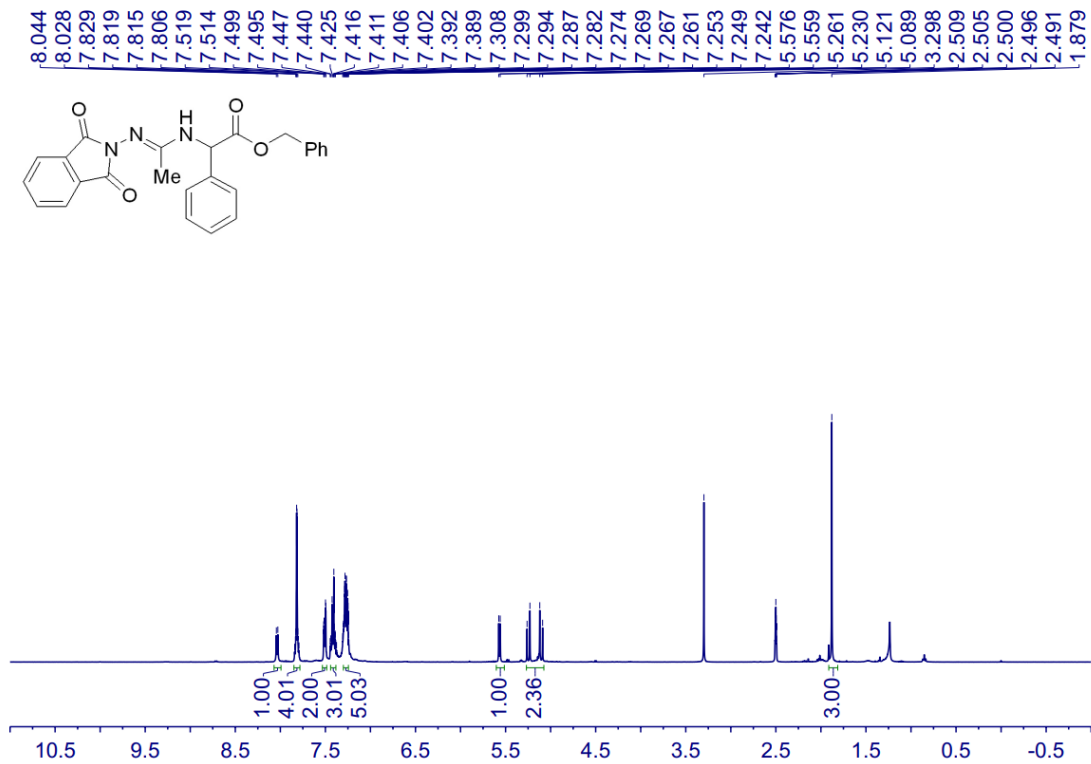

$^1\text{H}$  NMR Spectrum of Compound **3q** (400 MHz,  $\text{DMSO-}d_6$ )

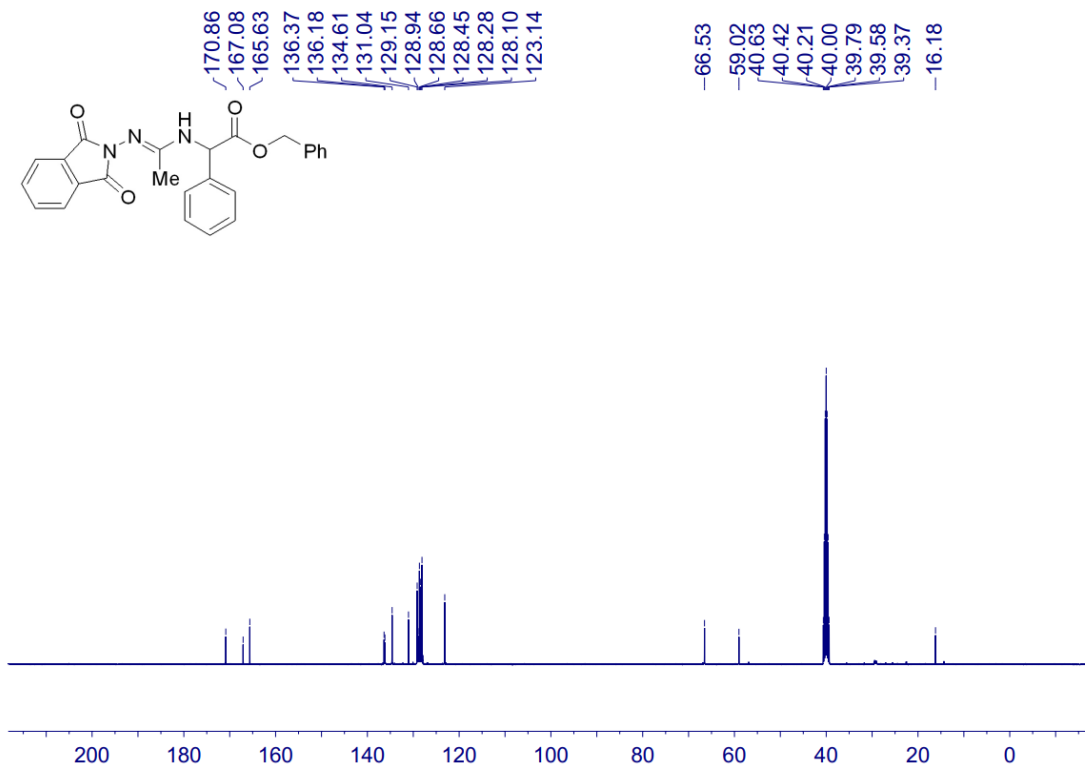

$^{13}\text{C}$  NMR Spectrum of Compound **3q** (100 MHz,  $\text{DMSO-}d_6$ )

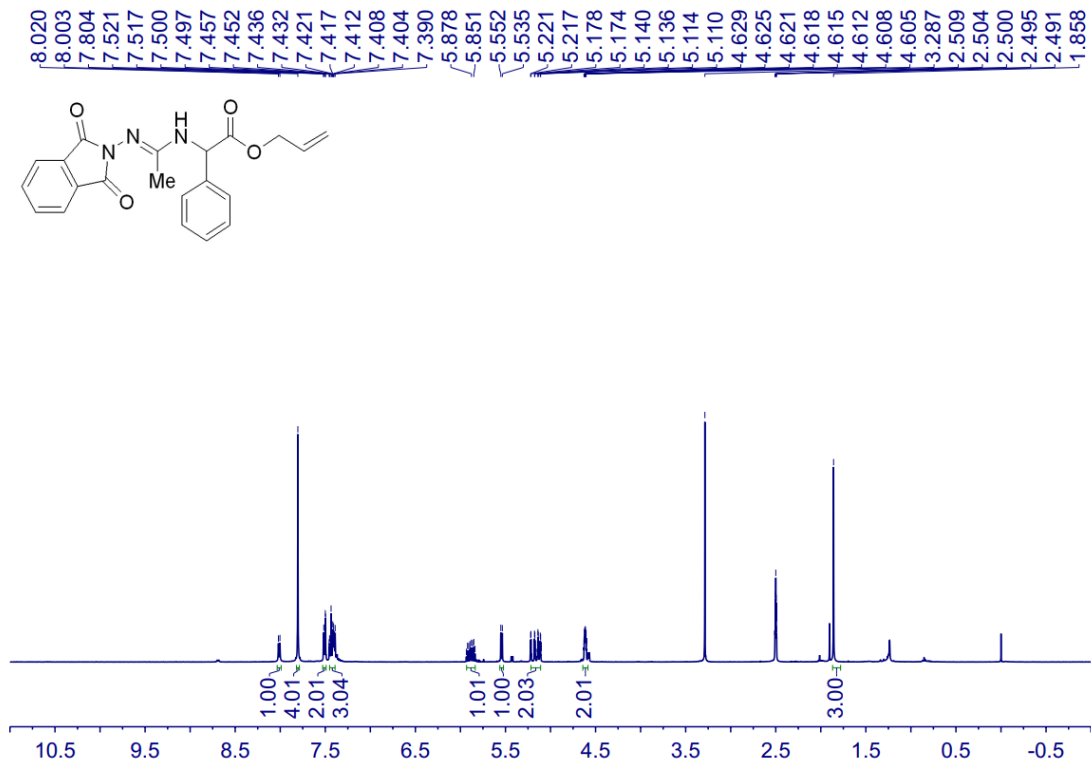

**<sup>1</sup>H NMR Spectrum of Compound 3r (400 MHz, DMSO-*d*<sub>6</sub>)**

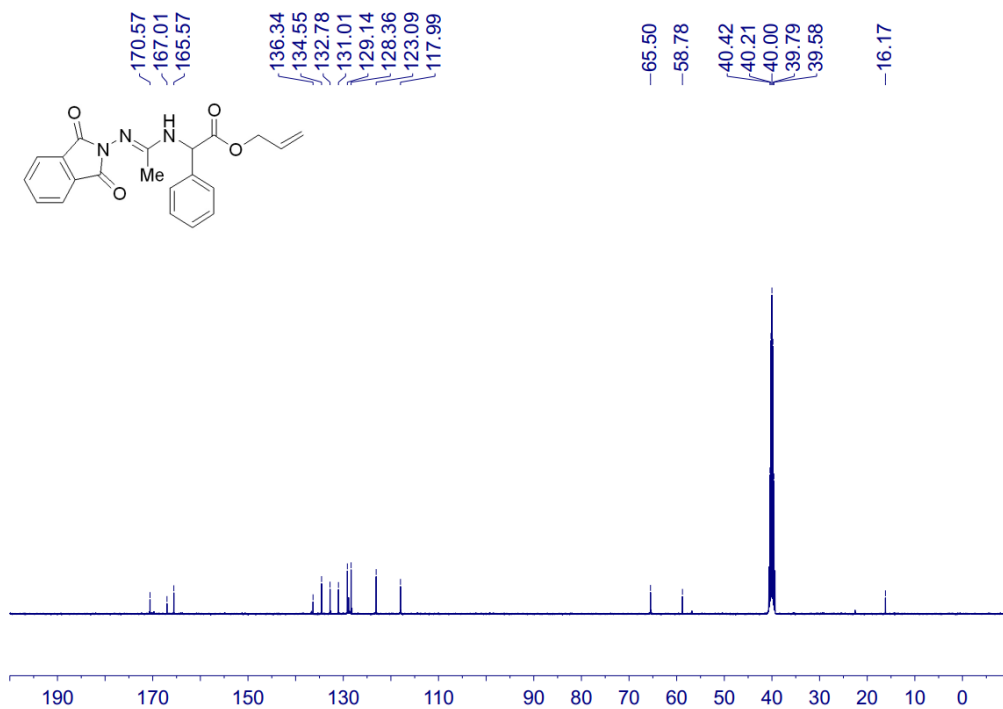

**<sup>13</sup>C NMR Spectrum of Compound 3r (100 MHz, DMSO-*d*<sub>6</sub>)**



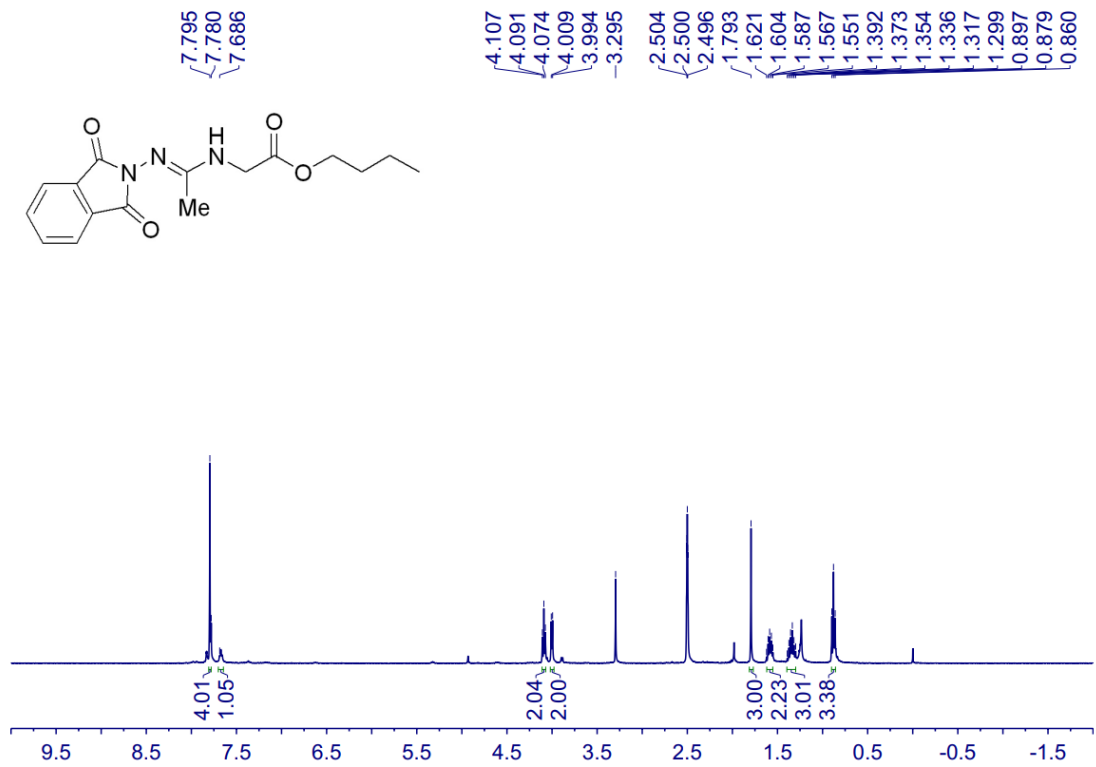

$^1\text{H}$  NMR Spectrum of Compound **3s** (400 MHz,  $\text{DMSO-}d_6$ )

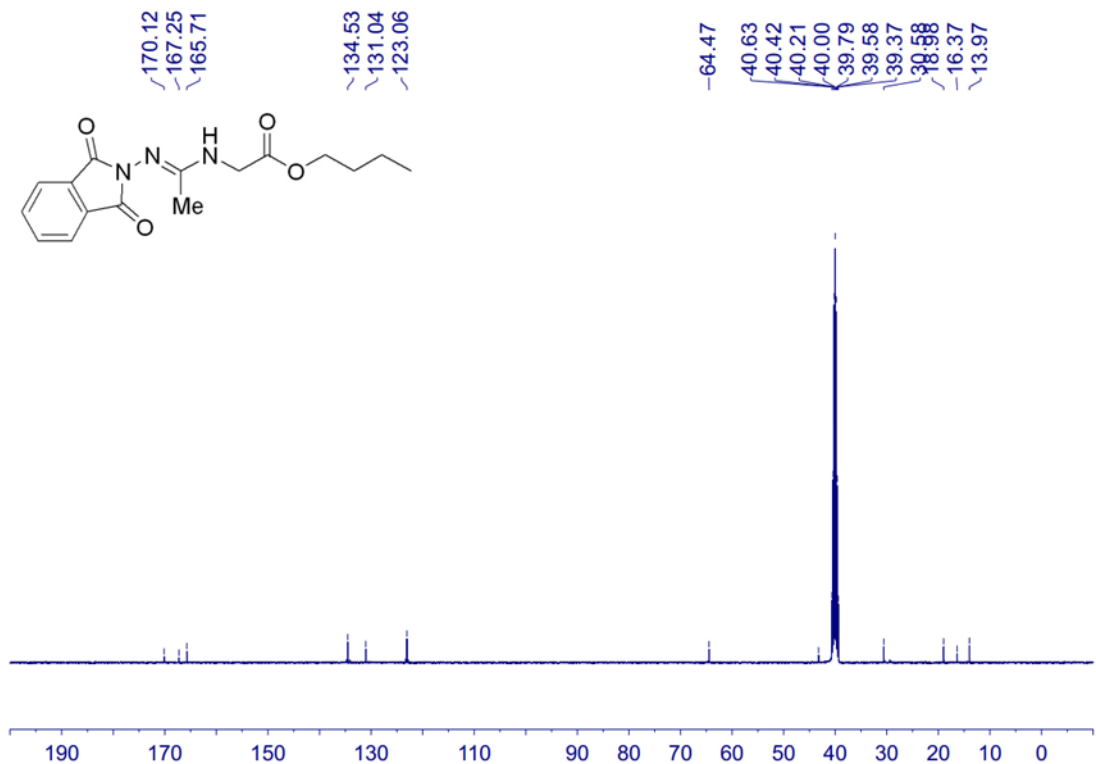

$^{13}\text{C}$  NMR Spectrum of Compound **3s** (100 MHz,  $\text{DMSO-}d_6$ )

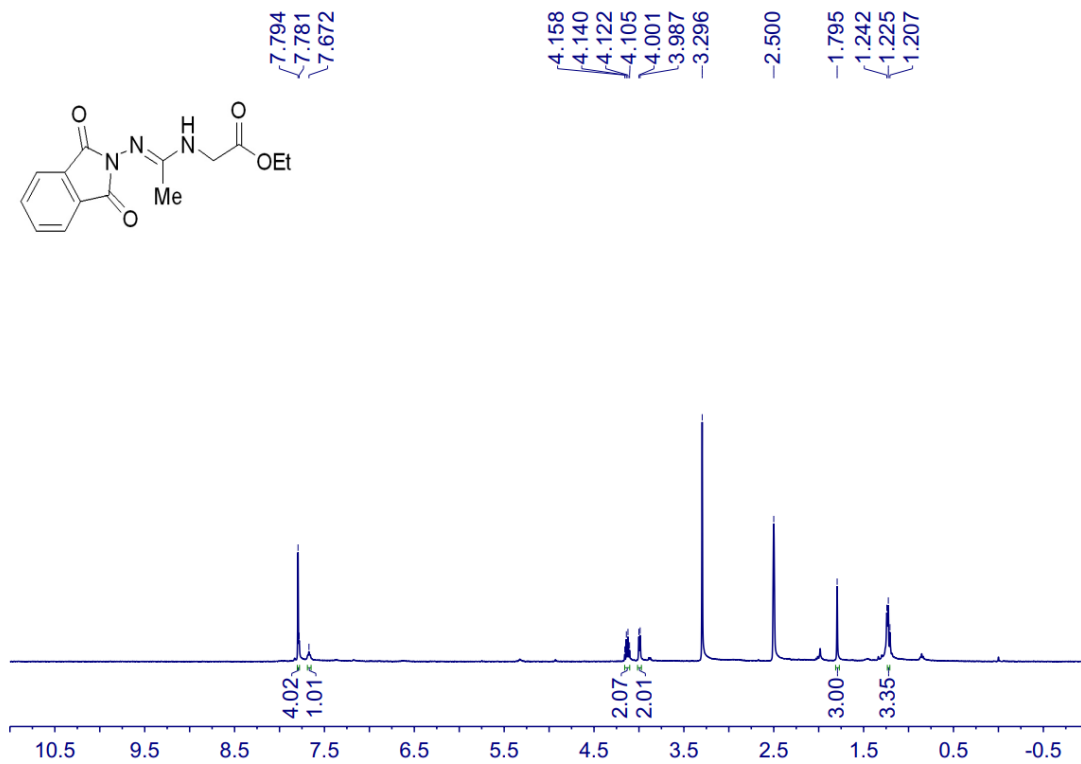

<sup>1</sup>H NMR Spectrum of Compound **3t** (400 MHz, DMSO-*d*<sub>6</sub>)

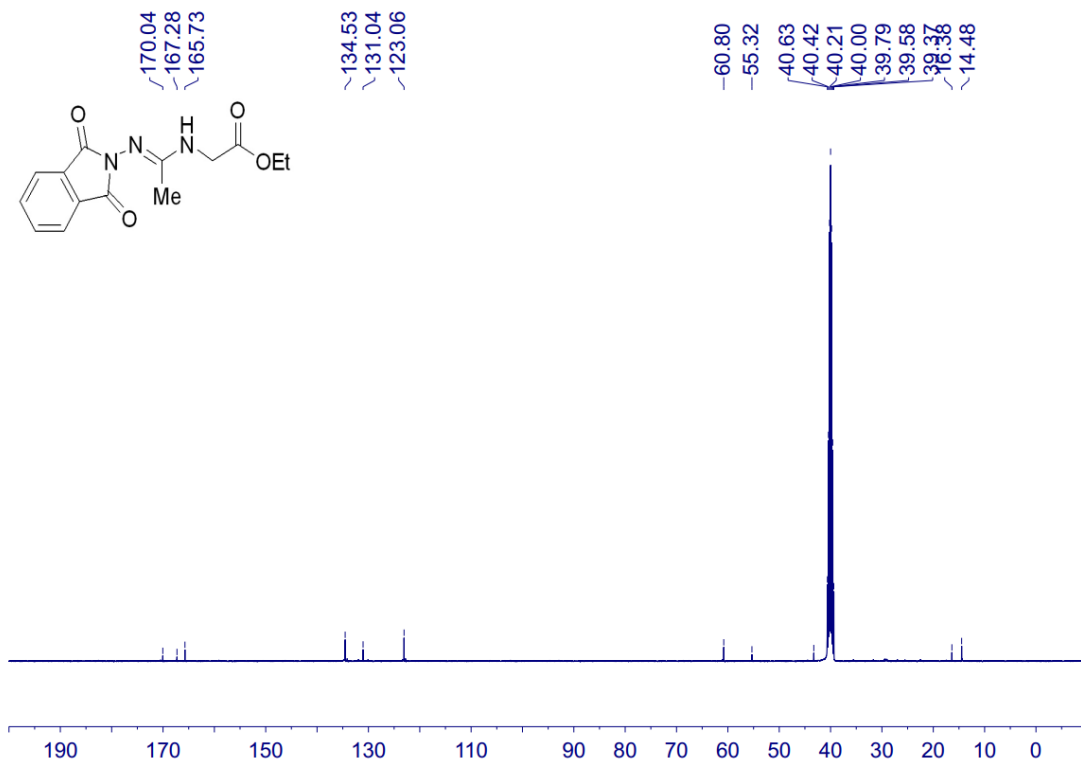

<sup>13</sup>C NMR Spectrum of Compound **3t** (100 MHz, DMSO-*d*<sub>6</sub>)

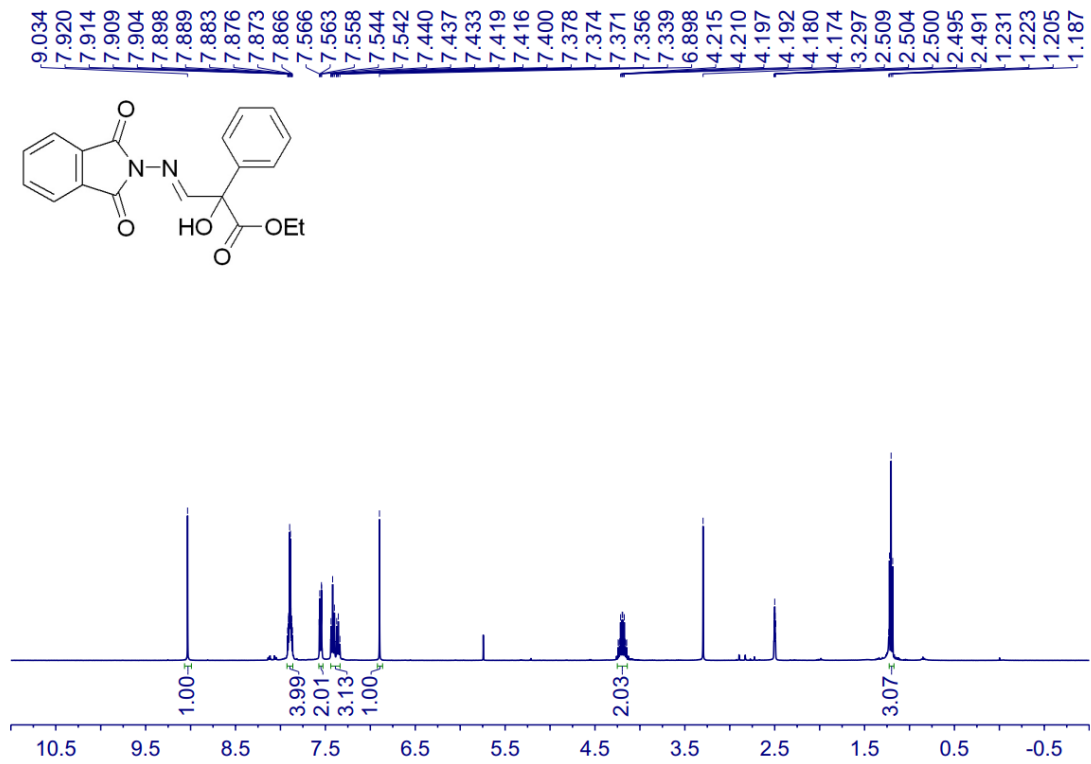

$^1\text{H}$  NMR Spectrum of Compound 4a (400 MHz,  $\text{DMSO-}d_6$ )

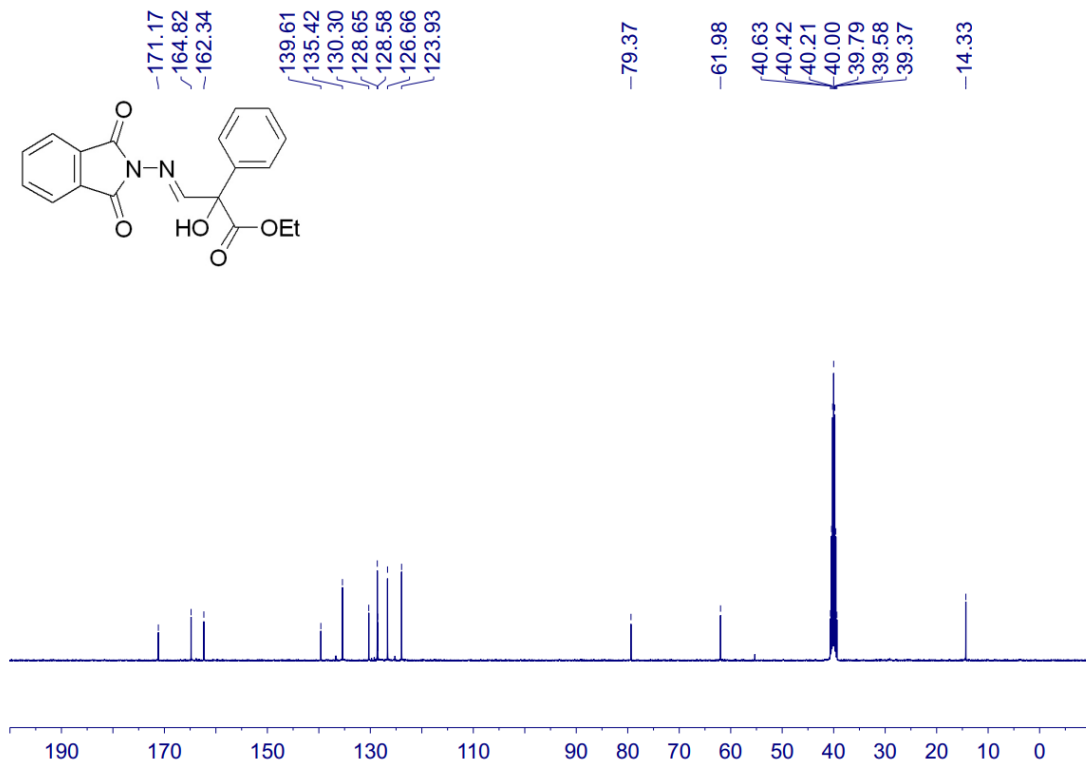

$^{13}\text{C}$  NMR Spectrum of Compound 4a (100 MHz,  $\text{DMSO-}d_6$ )

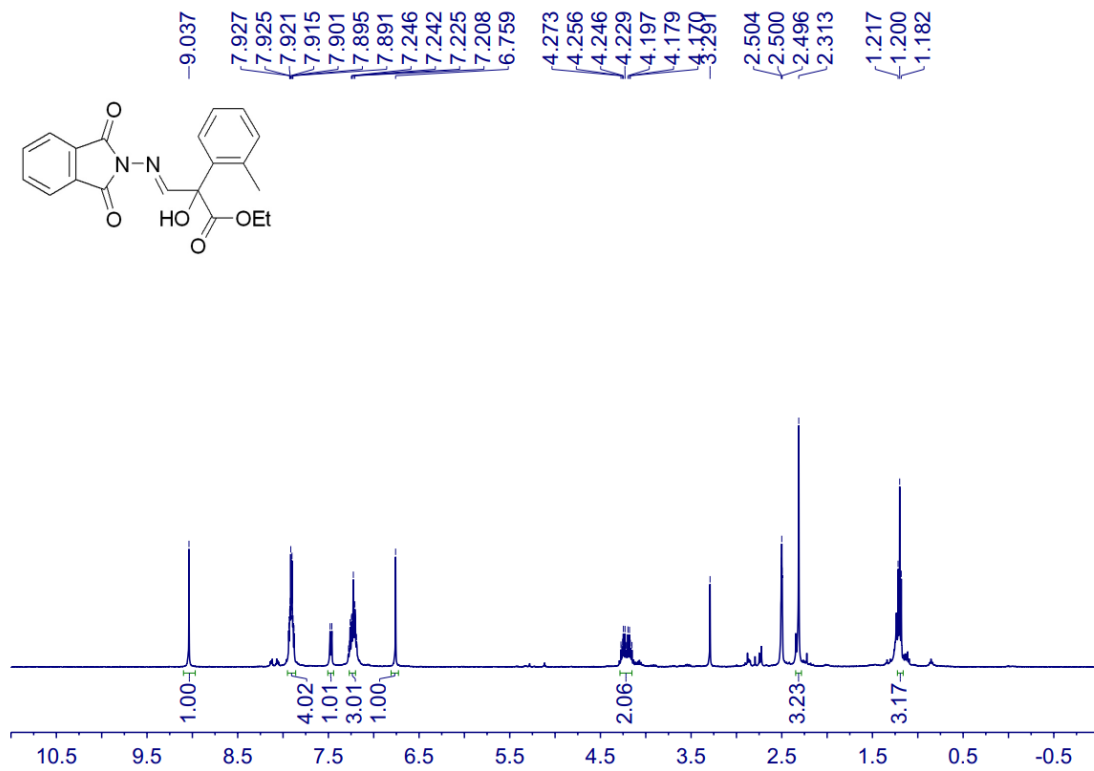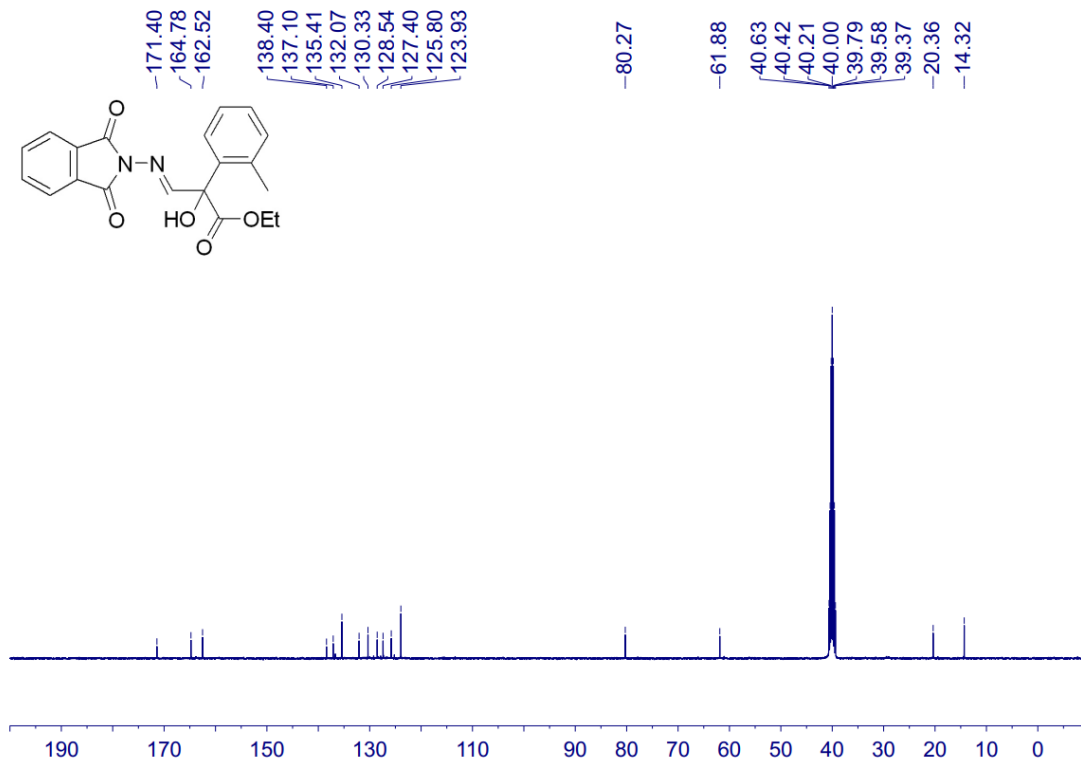

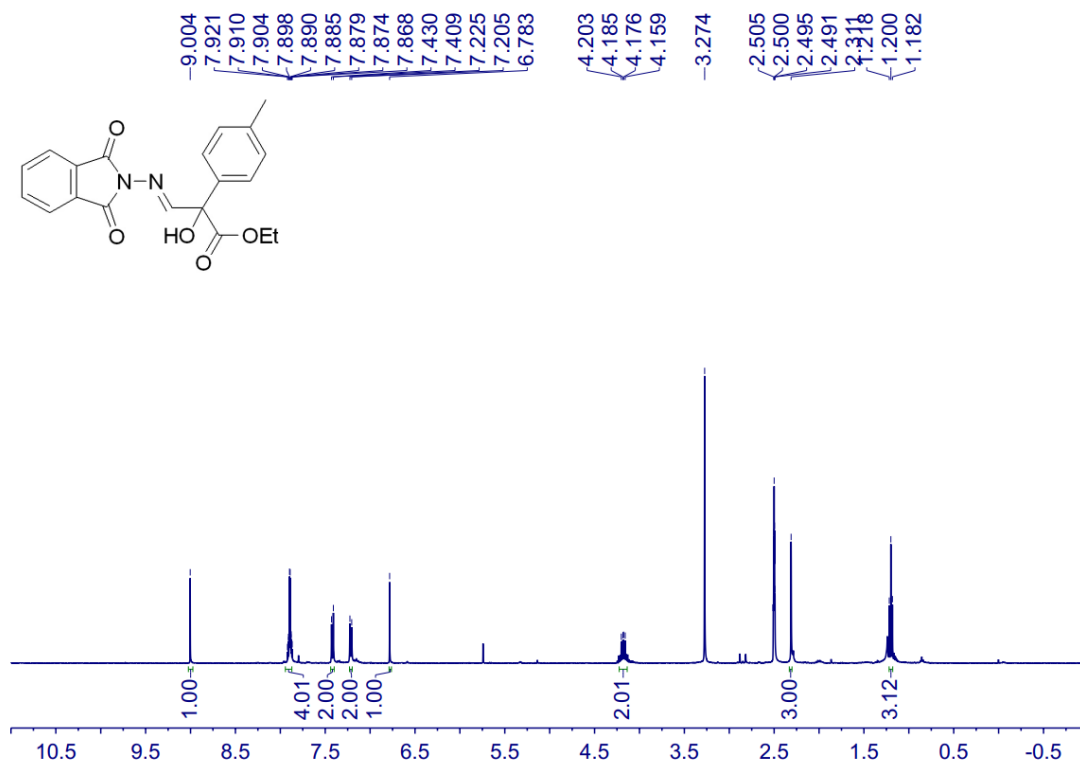

<sup>1</sup>H NMR Spectrum of Compound 4c (400 MHz, DMSO-*d*<sub>6</sub>)

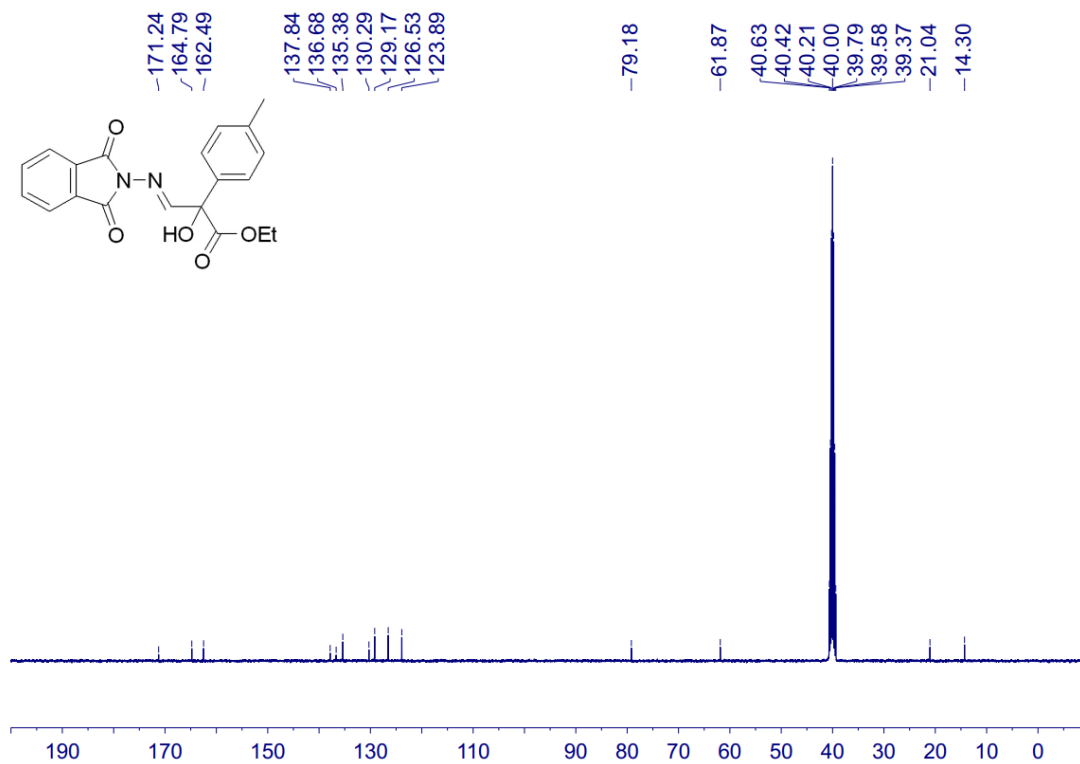

<sup>13</sup>C NMR Spectrum of Compound 4c (100 MHz, DMSO-*d*<sub>6</sub>)

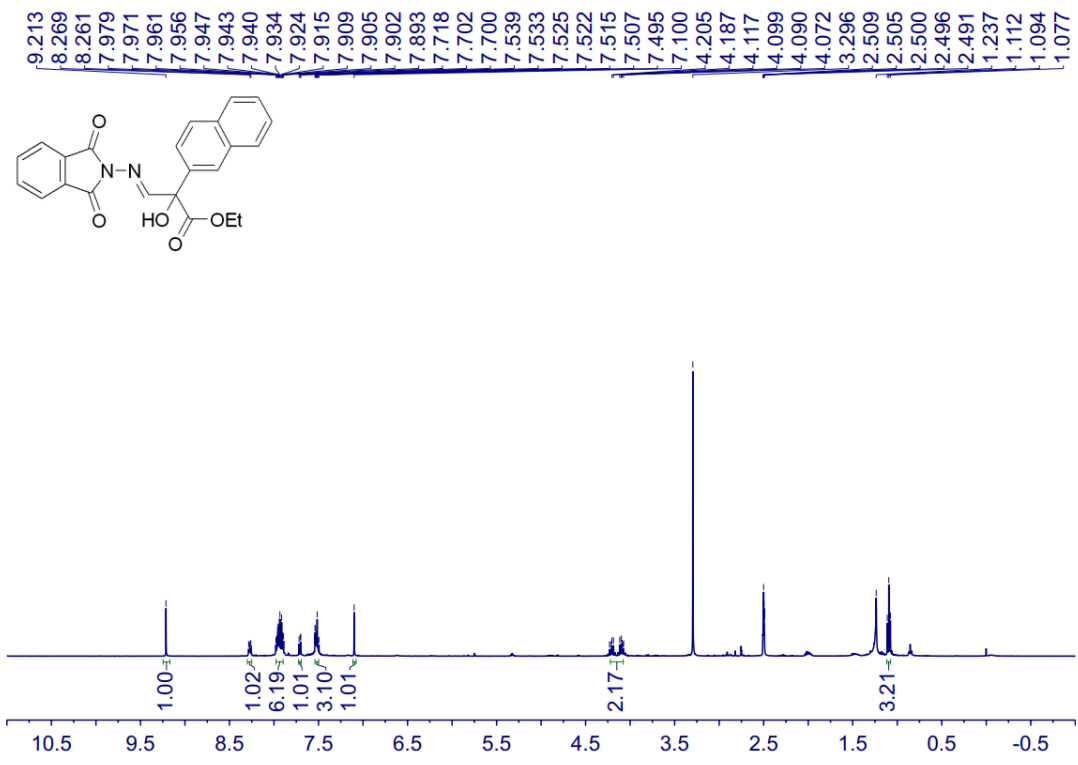

<sup>1</sup>H NMR Spectrum of Compound 4d (400 MHz, DMSO-*d*<sub>6</sub>)

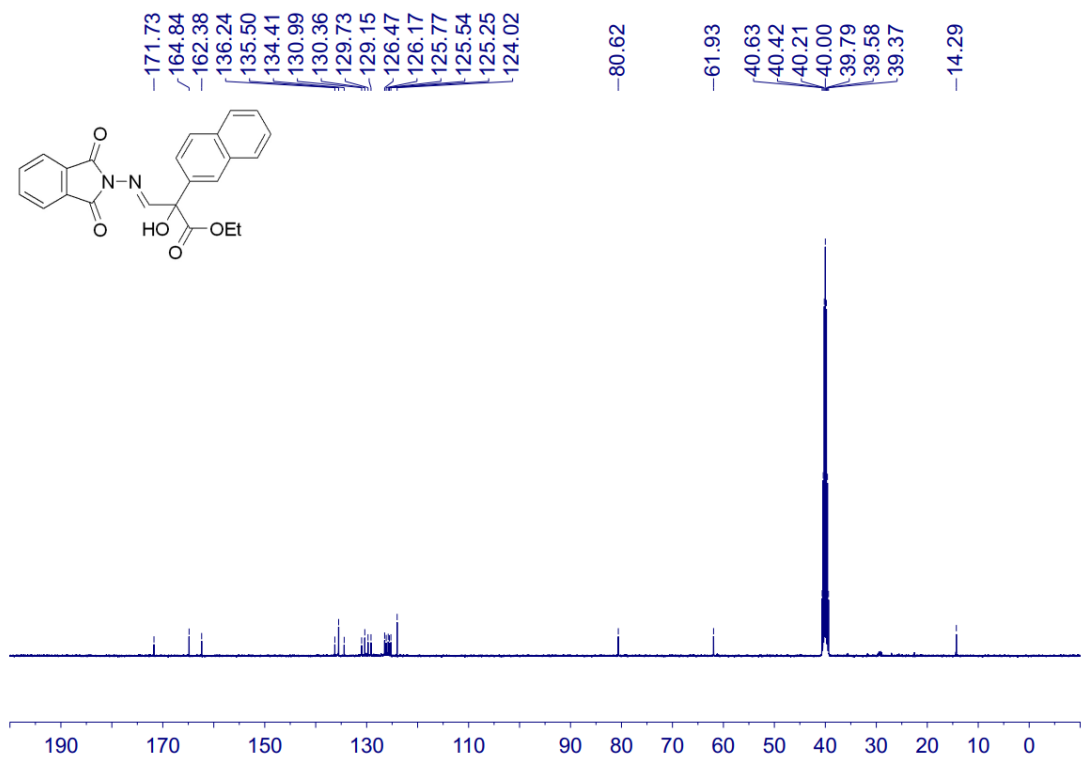

<sup>13</sup>C NMR Spectrum of Compound 4d (100 MHz, DMSO-*d*<sub>6</sub>)

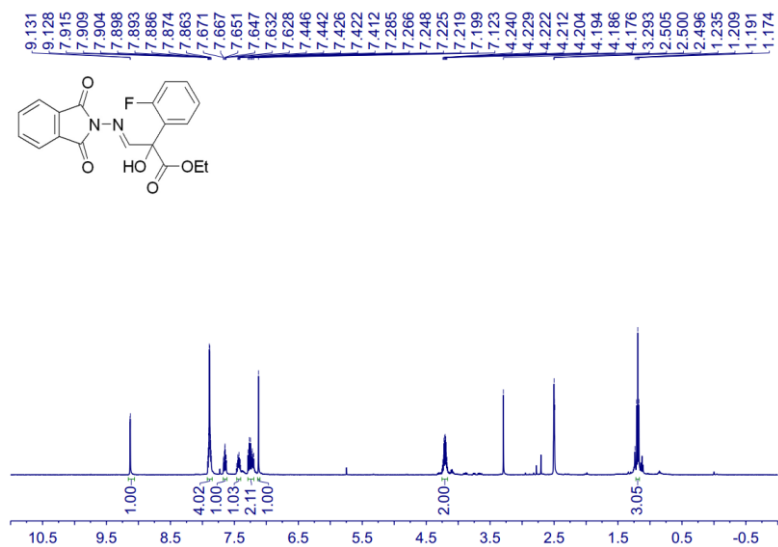

$^1\text{H}$  NMR Spectrum of Compound **4e** (400 MHz,  $\text{DMSO-}d_6$ )

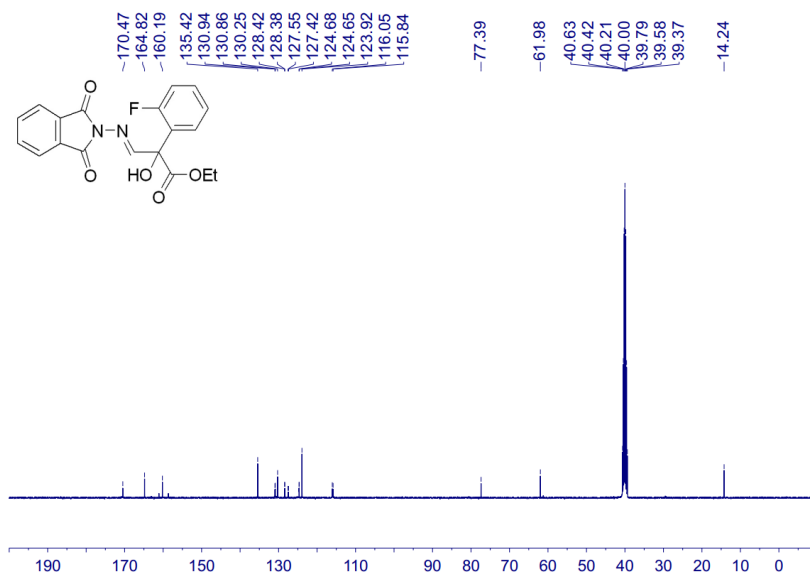

$^{13}\text{C}$  NMR Spectrum of Compound **4e** (100 MHz,  $\text{DMSO-}d_6$ )

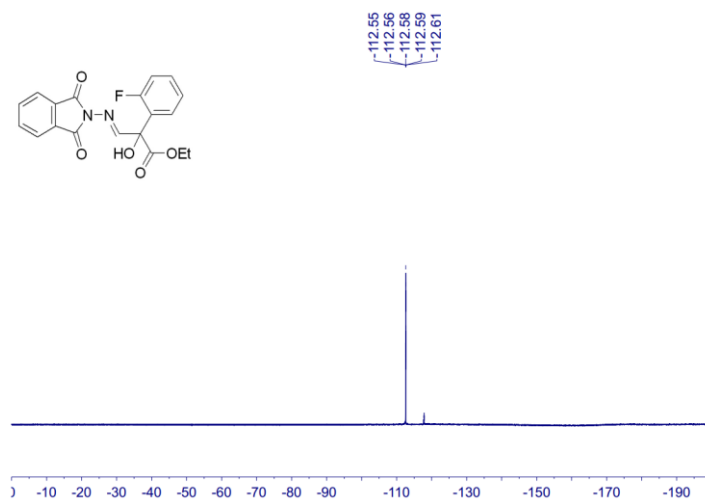

$^{19}\text{F}$  NMR Spectrum of Compound **4e** (376 MHz,  $\text{DMSO-}d_6$ )

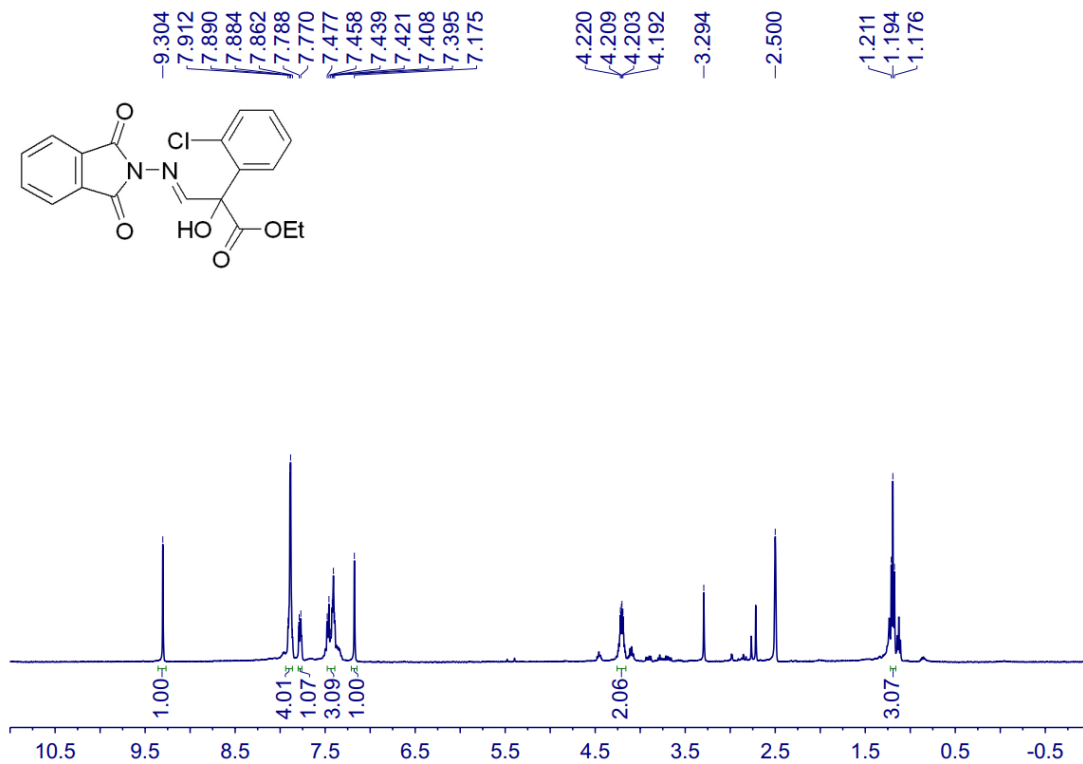

<sup>1</sup>H NMR Spectrum of Compound 4f (400 MHz, DMSO-*d*<sub>6</sub>)

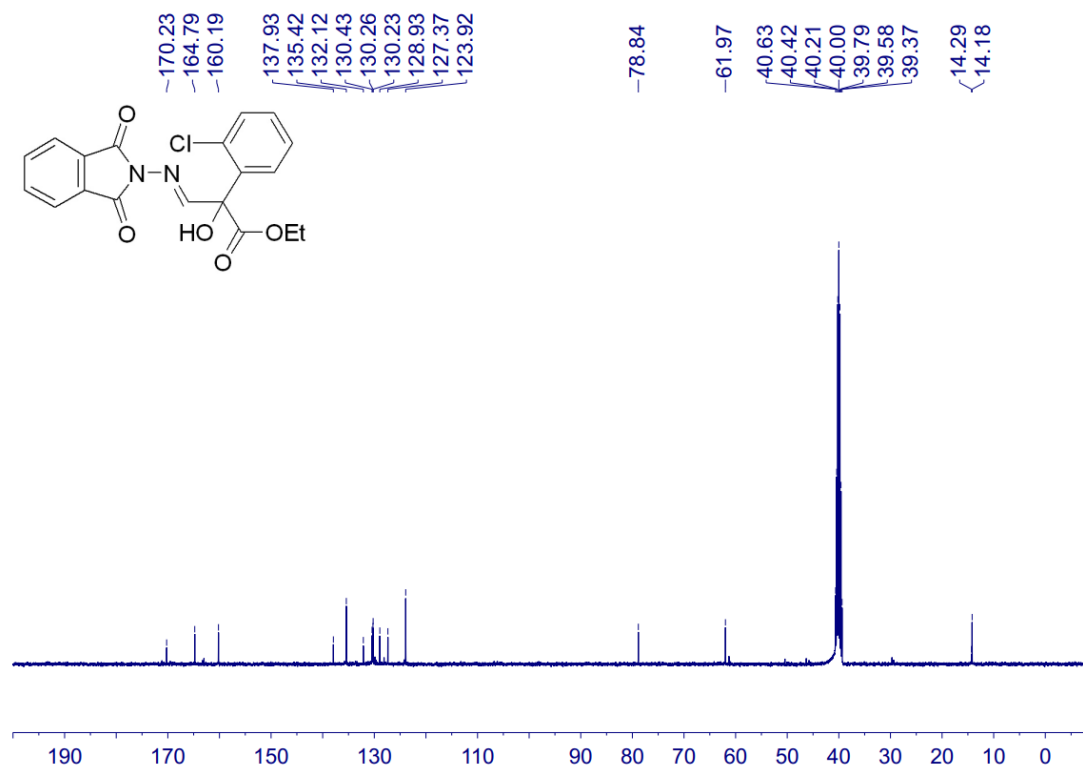

<sup>13</sup>C NMR Spectrum of Compound 4f (100 MHz, DMSO-*d*<sub>6</sub>)



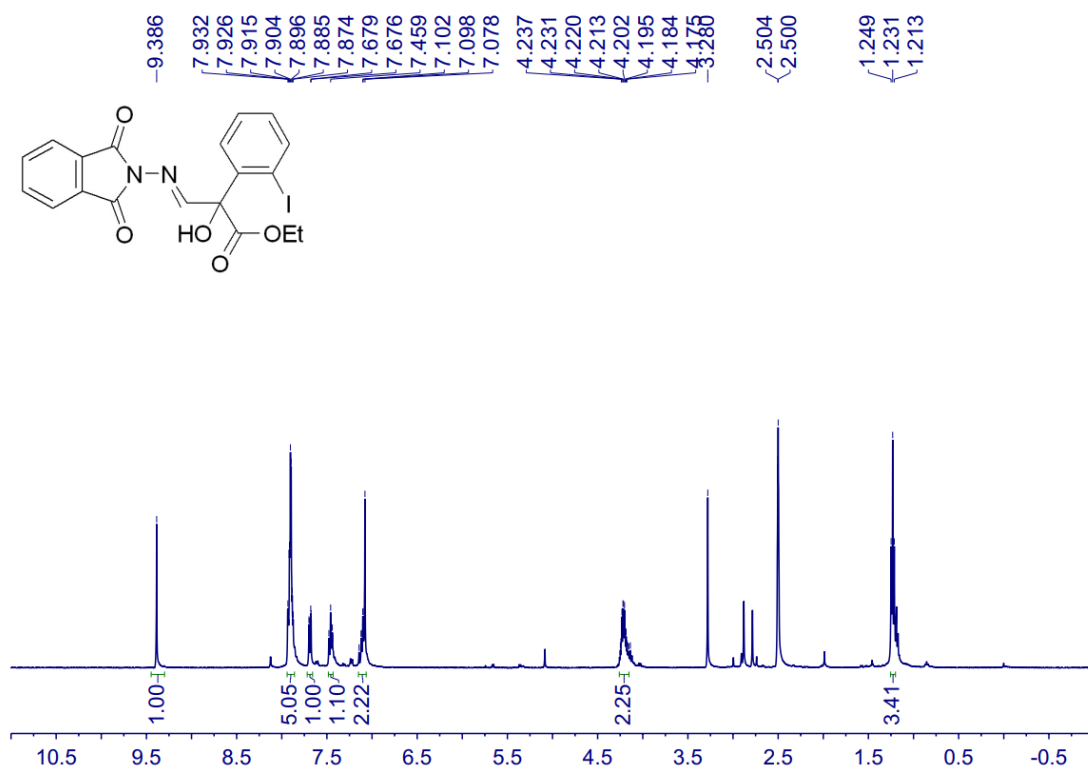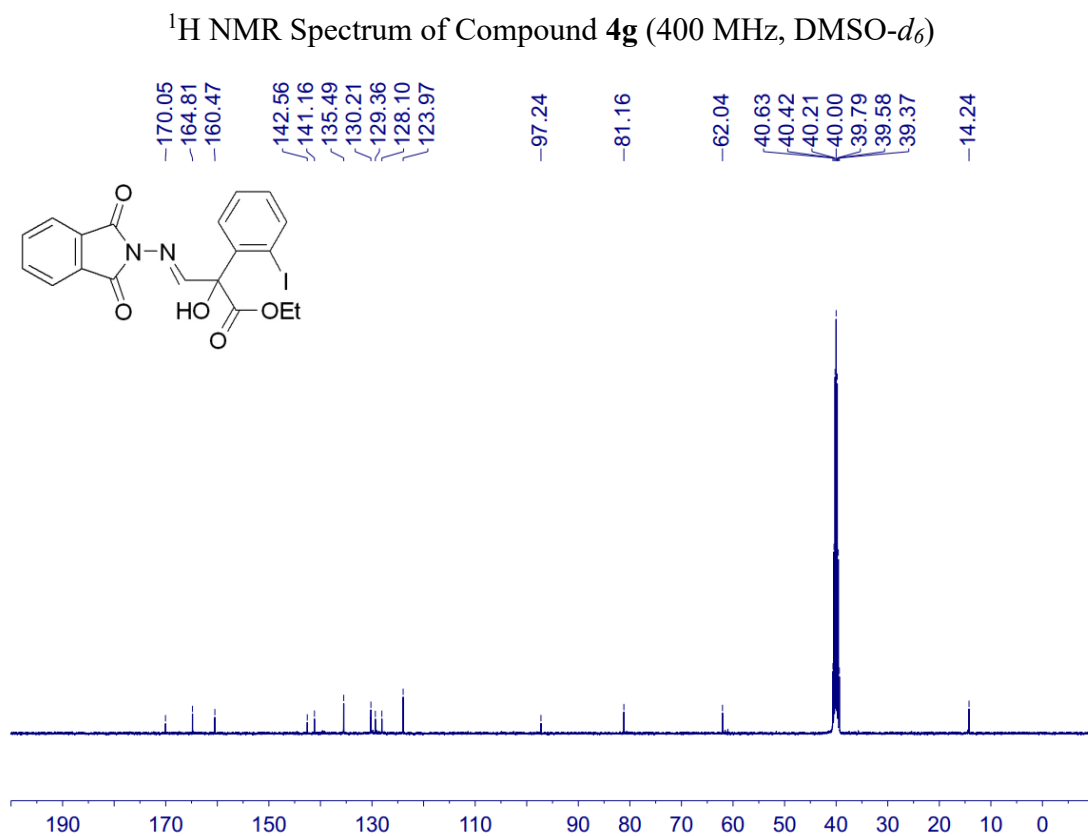

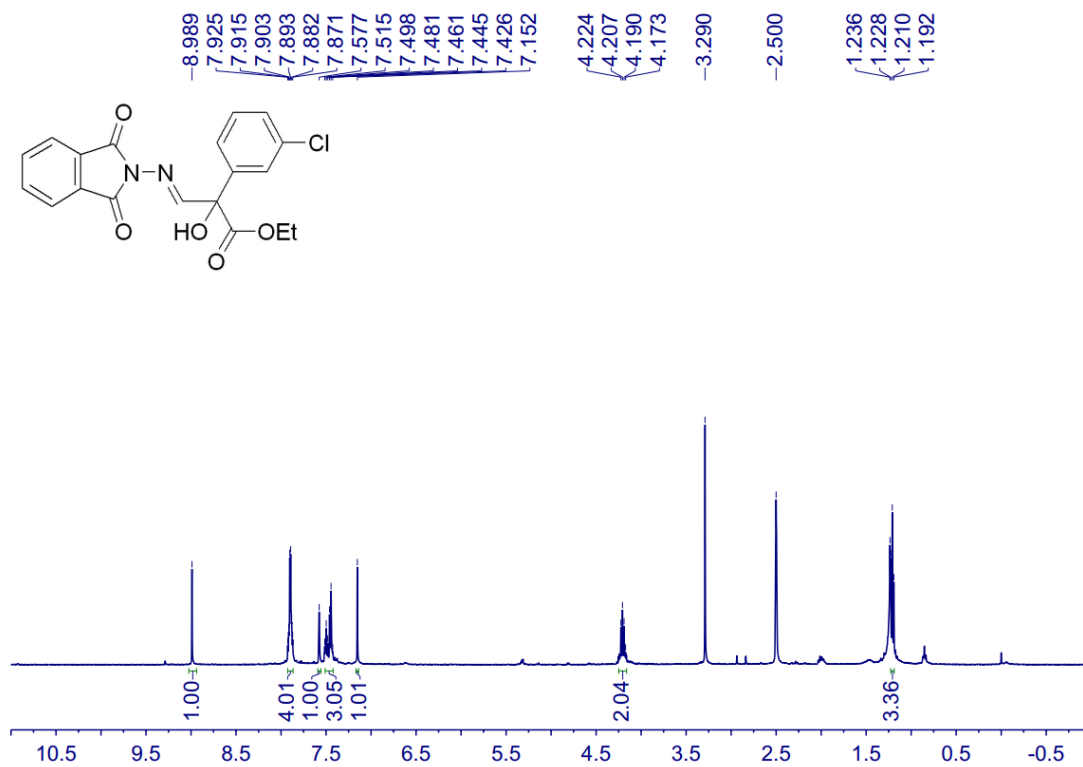

<sup>1</sup>H NMR Spectrum of Compound **4h** (400 MHz, DMSO-*d*<sub>6</sub>)

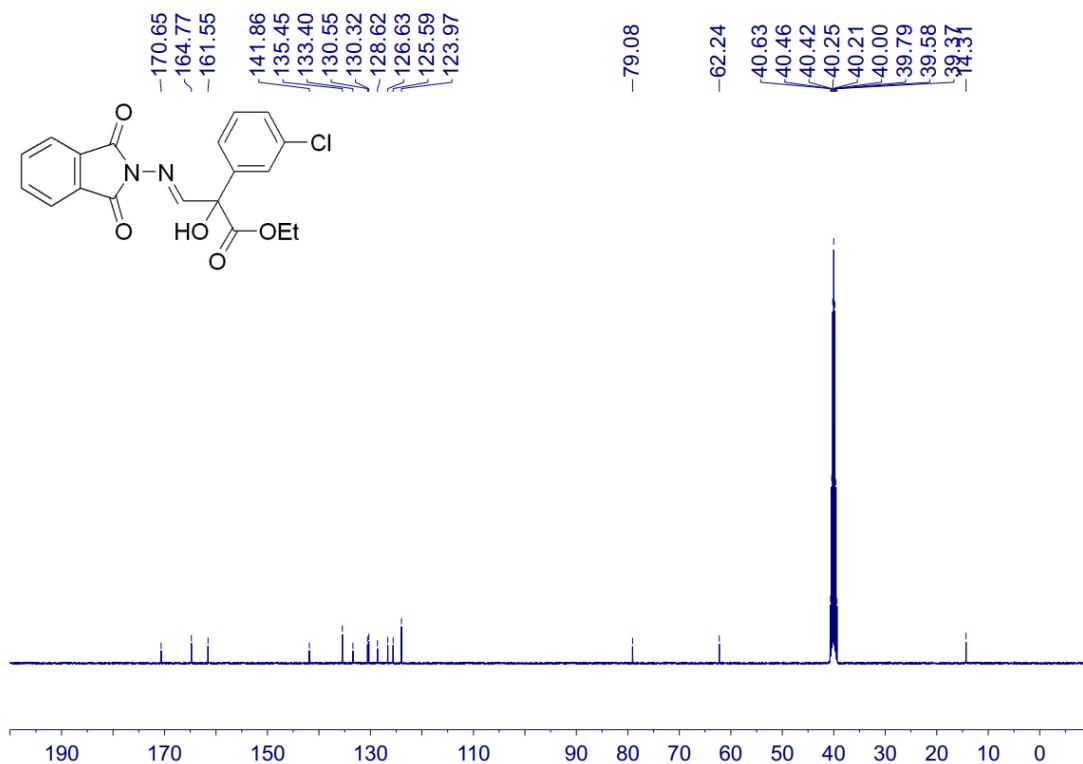

<sup>13</sup>C NMR Spectrum of Compound **4h** (100 MHz, DMSO-*d*<sub>6</sub>)

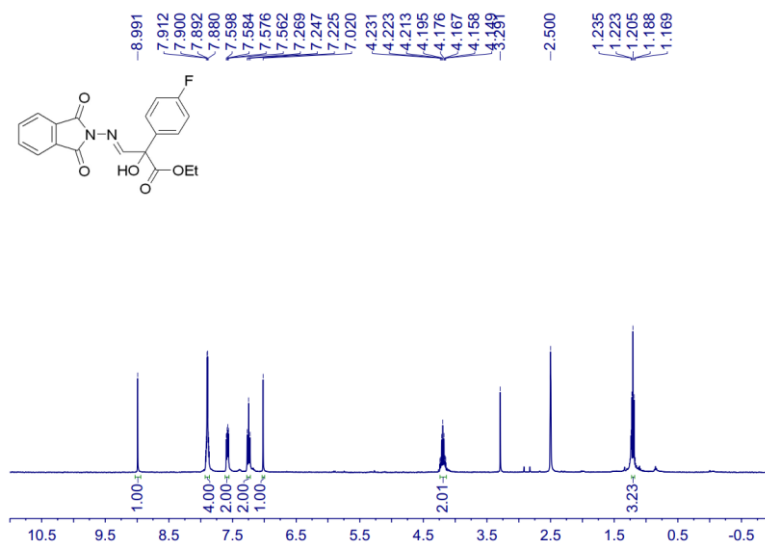

<sup>1</sup>H NMR Spectrum of Compound 4i (400 MHz, DMSO-*d*<sub>6</sub>)

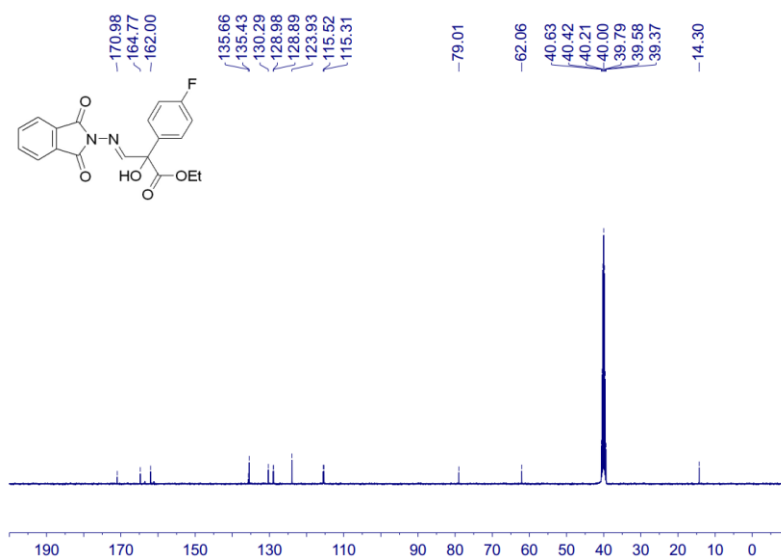

<sup>13</sup>C NMR Spectrum of Compound 4i (100 MHz, DMSO-*d*<sub>6</sub>)

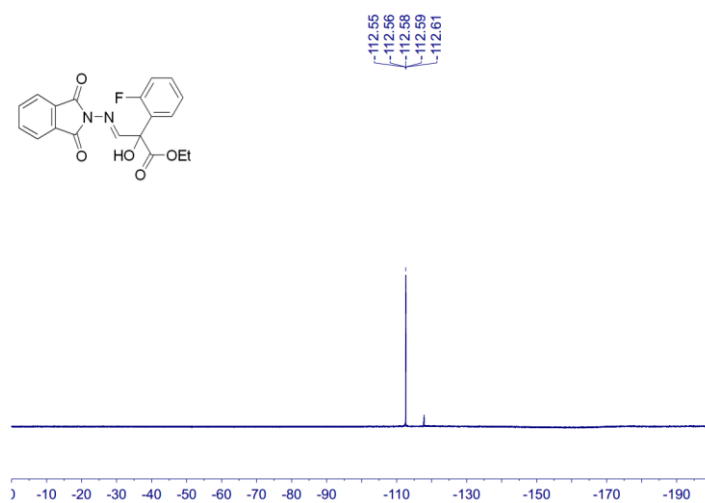

<sup>19</sup>F NMR Spectrum of Compound 4i (376 MHz, DMSO-*d*<sub>6</sub>)

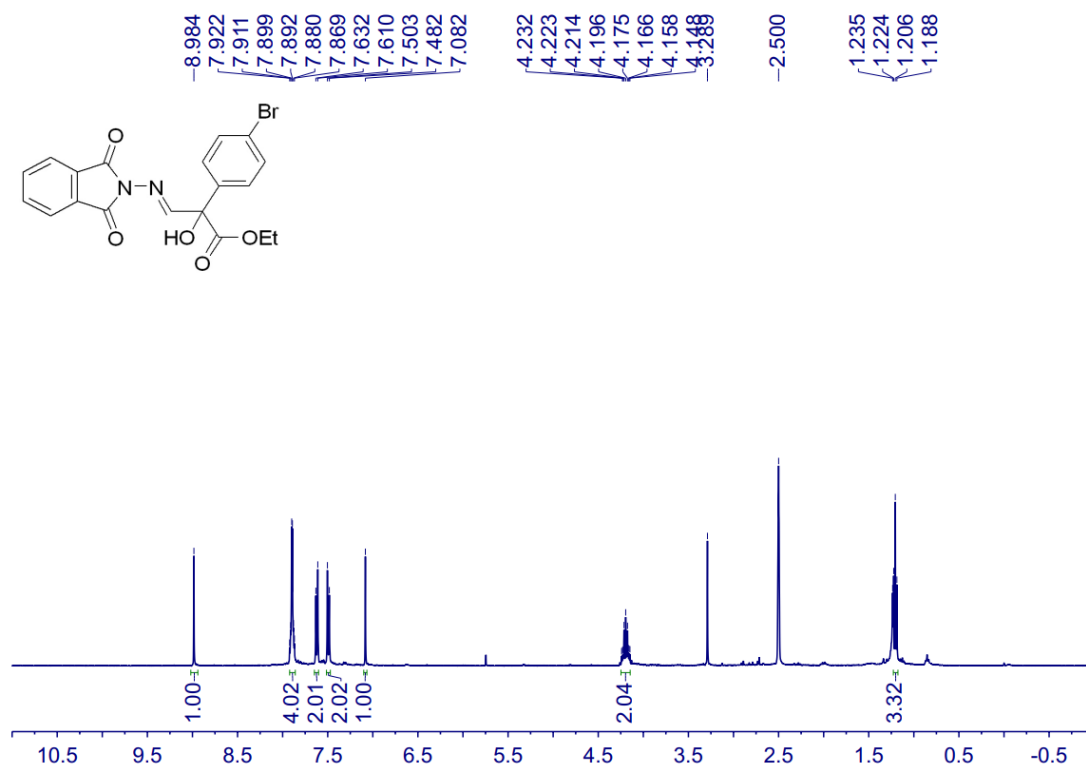

<sup>1</sup>H NMR Spectrum of Compound 4j (400 MHz, DMSO-*d*<sub>6</sub>)

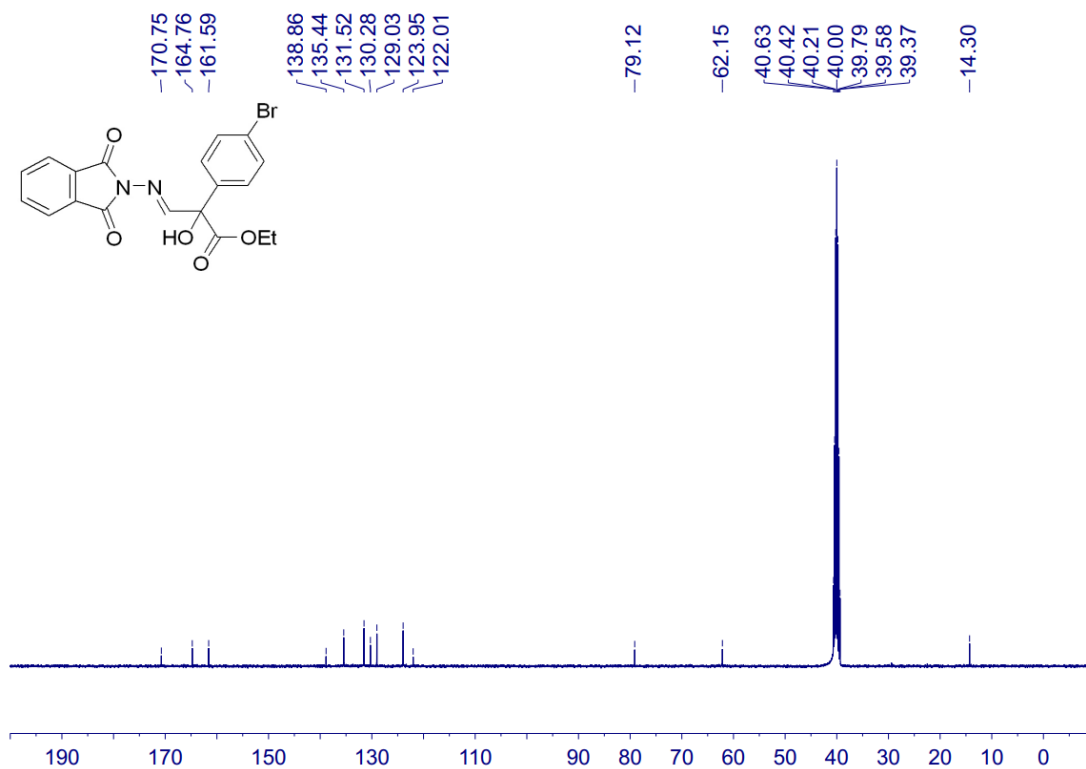

<sup>13</sup>C NMR Spectrum of Compound 4j (100 MHz, DMSO-*d*<sub>6</sub>)

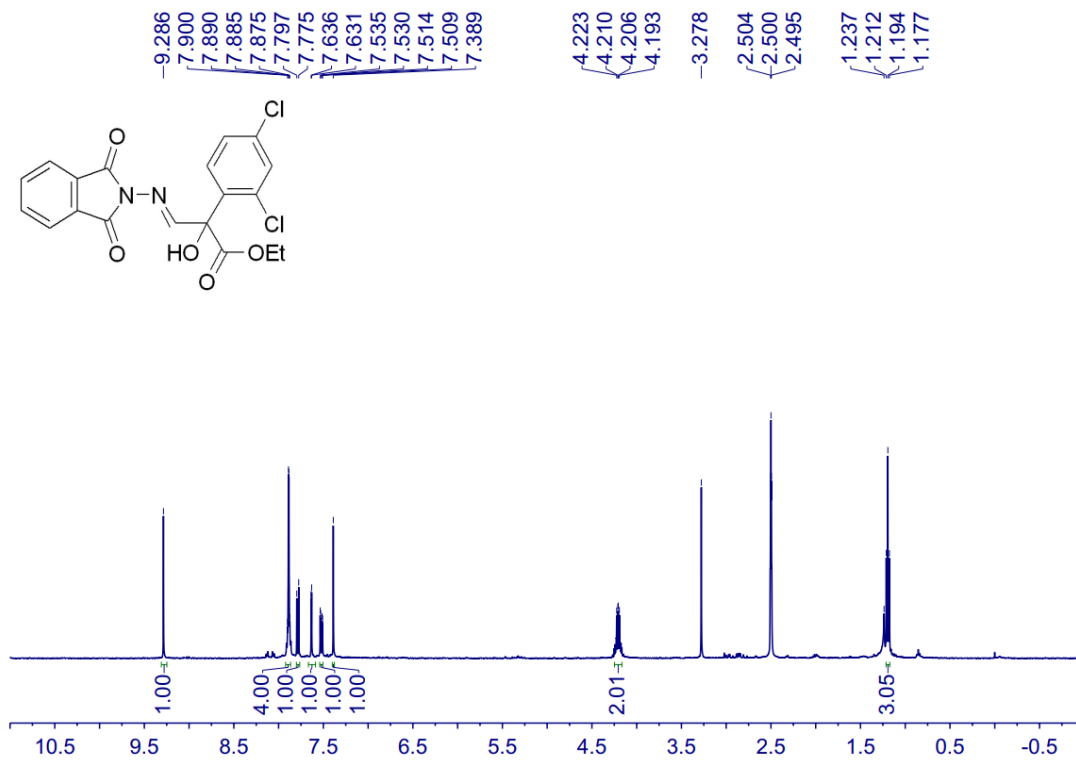

<sup>1</sup>H NMR Spectrum of Compound 4k (400 MHz, DMSO-*d*<sub>6</sub>)

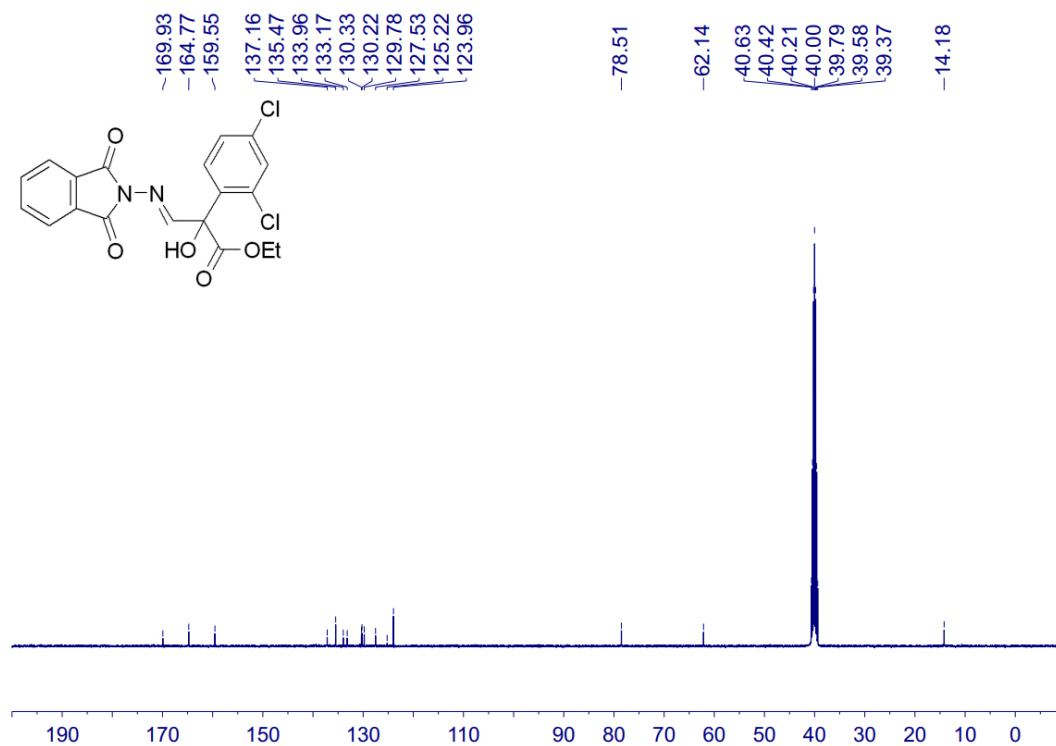

<sup>13</sup>C NMR Spectrum of Compound 4k (100 MHz, DMSO-*d*<sub>6</sub>)

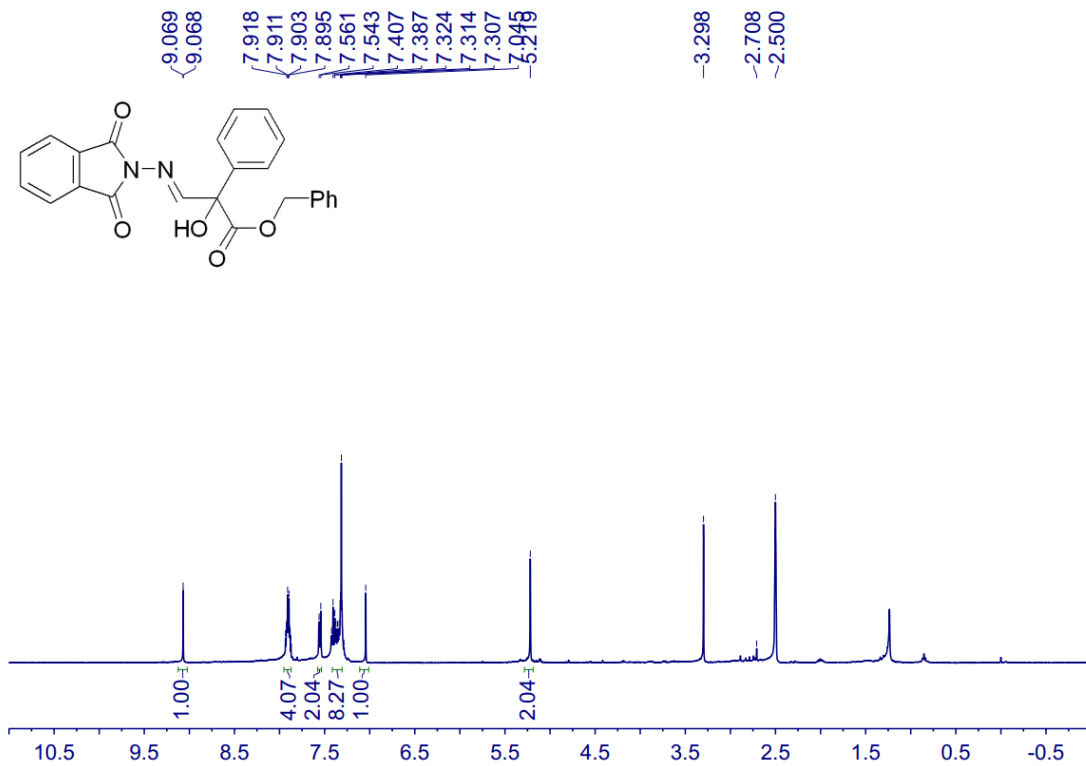

<sup>1</sup>H NMR Spectrum of Compound 4I (400 MHz, DMSO-*d*<sub>6</sub>)

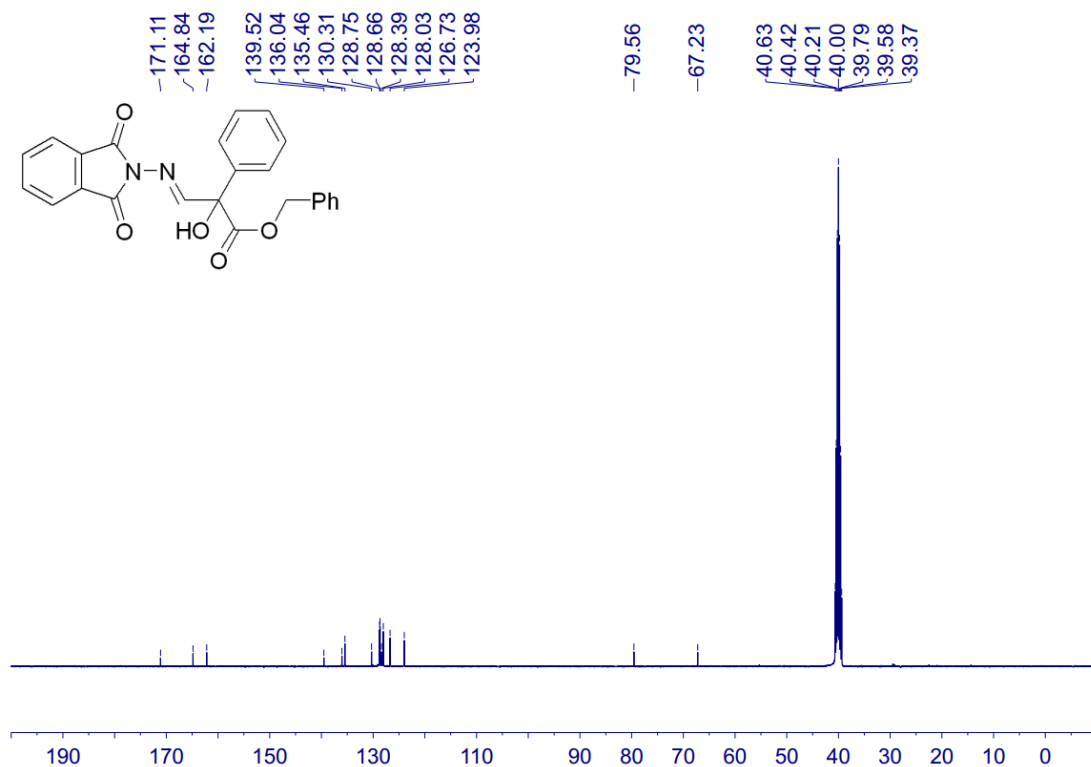

<sup>13</sup>C NMR Spectrum of Compound 4I (100 MHz, DMSO-*d*<sub>6</sub>)

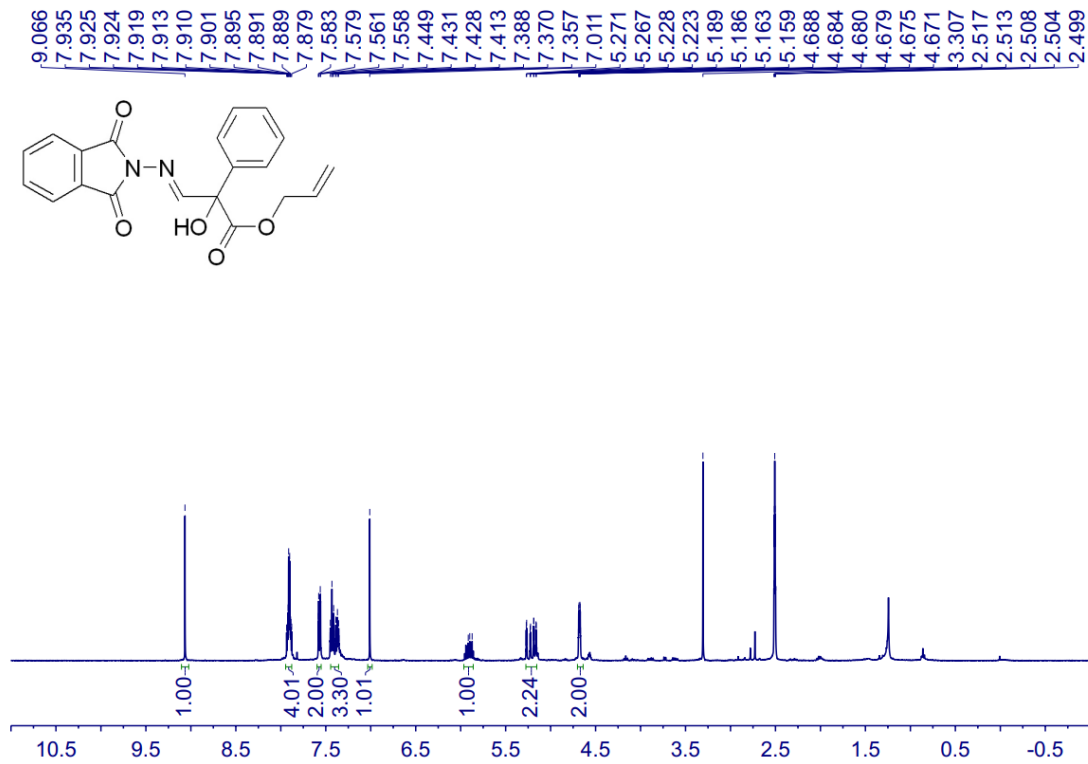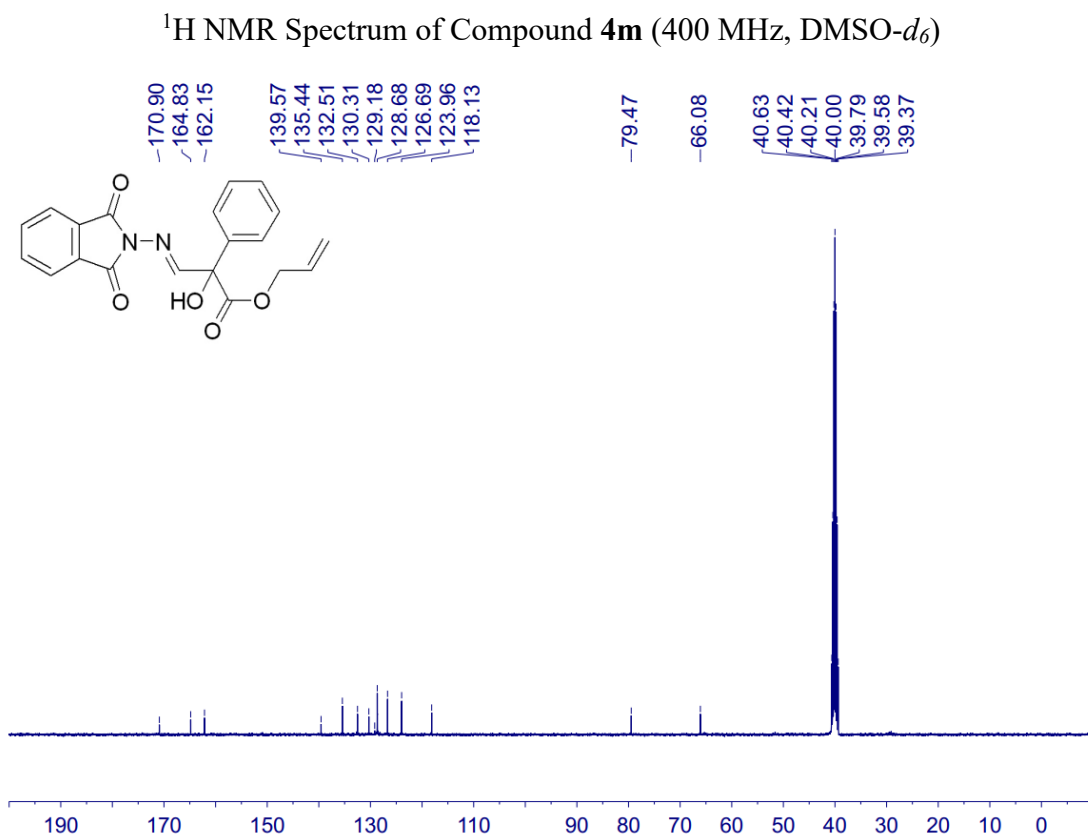

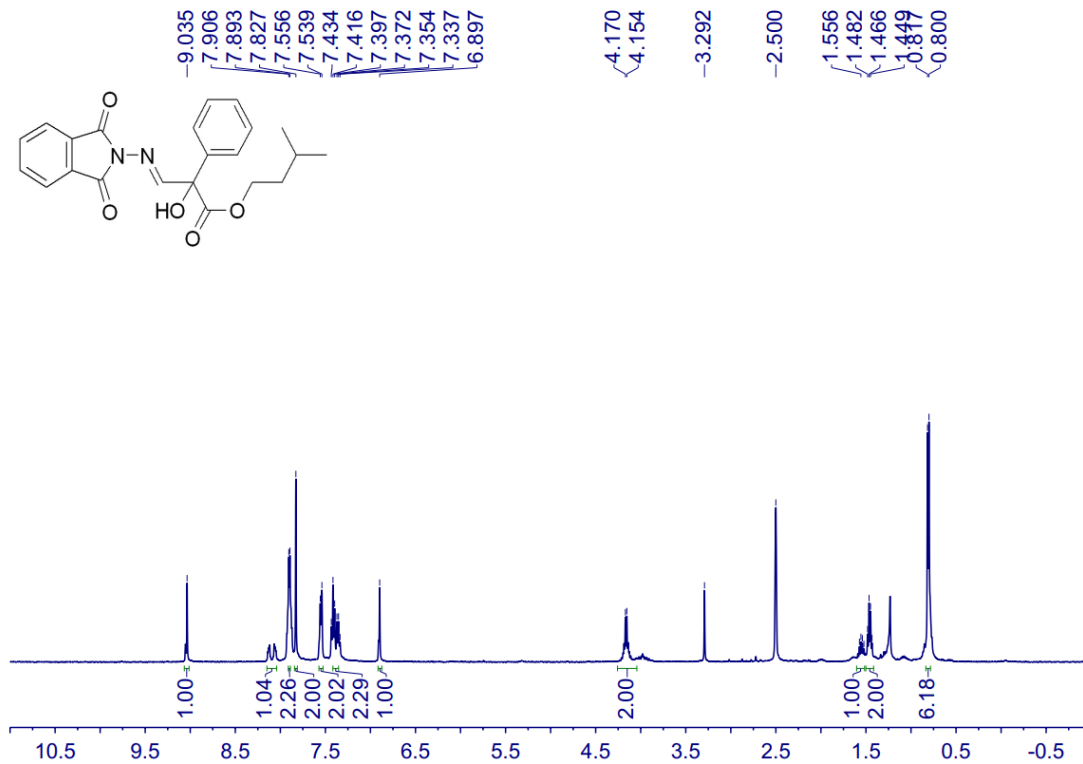

<sup>1</sup>H NMR Spectrum of Compound 4n (400 MHz, DMSO-*d*<sub>6</sub>)

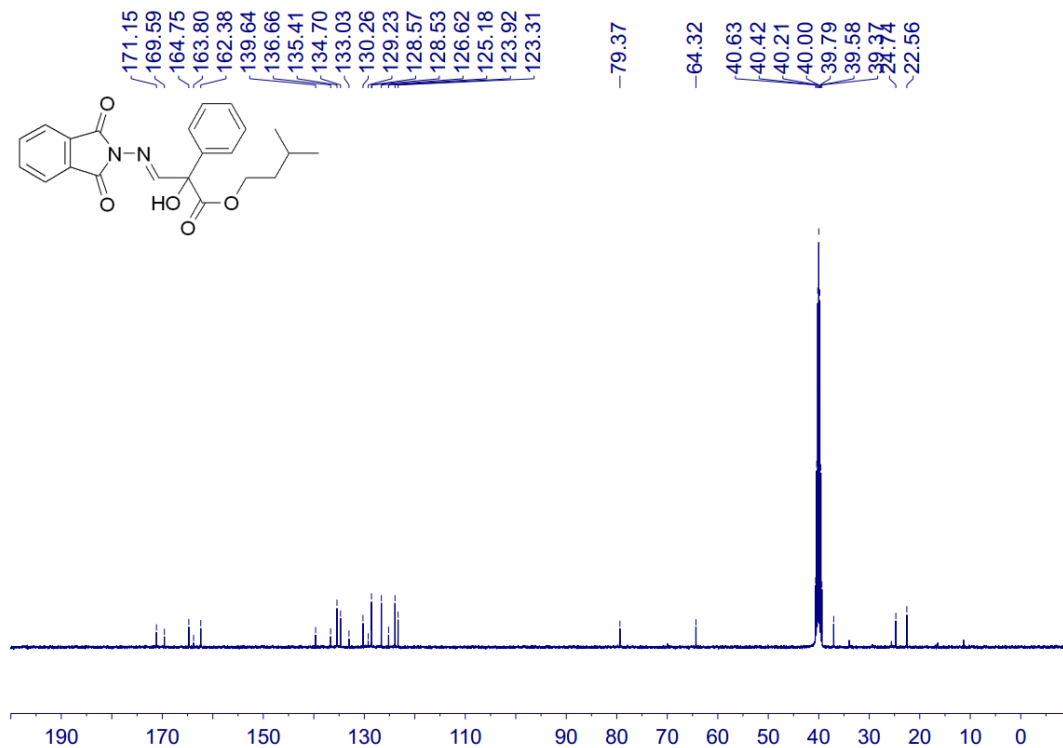

<sup>13</sup>C NMR Spectrum of Compound 4n (100 MHz, DMSO-*d*<sub>6</sub>)



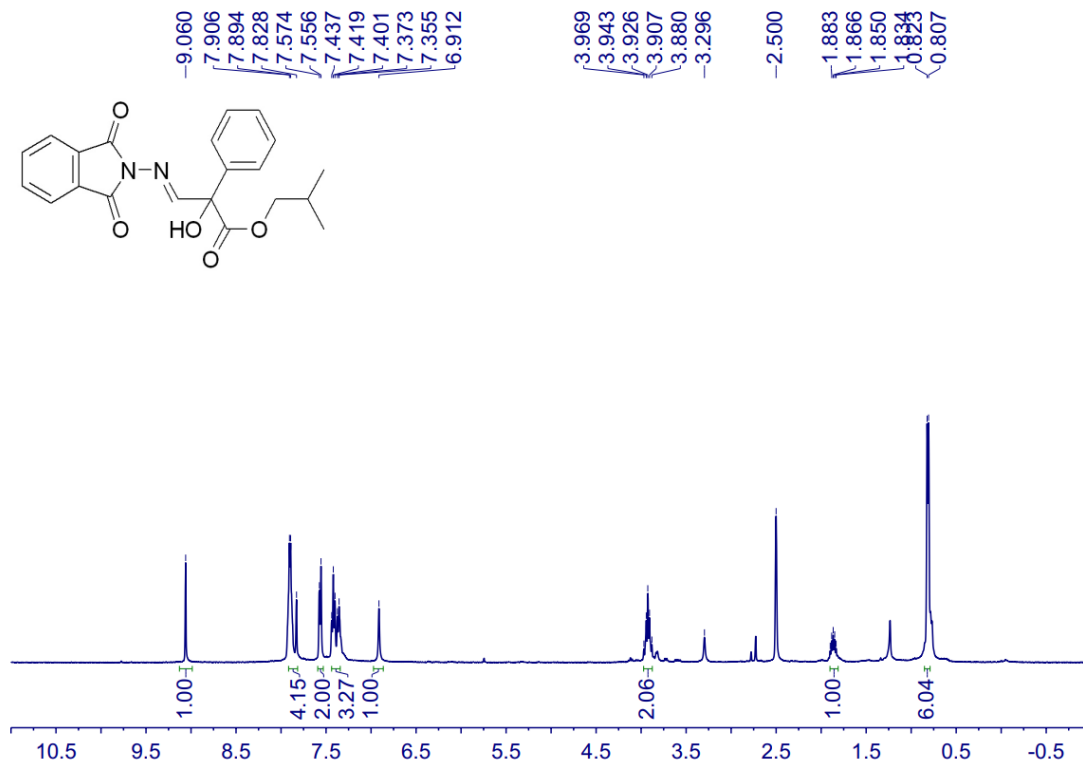

$^1\text{H}$  NMR Spectrum of Compound **4o** (400 MHz,  $\text{DMSO-}d_6$ )

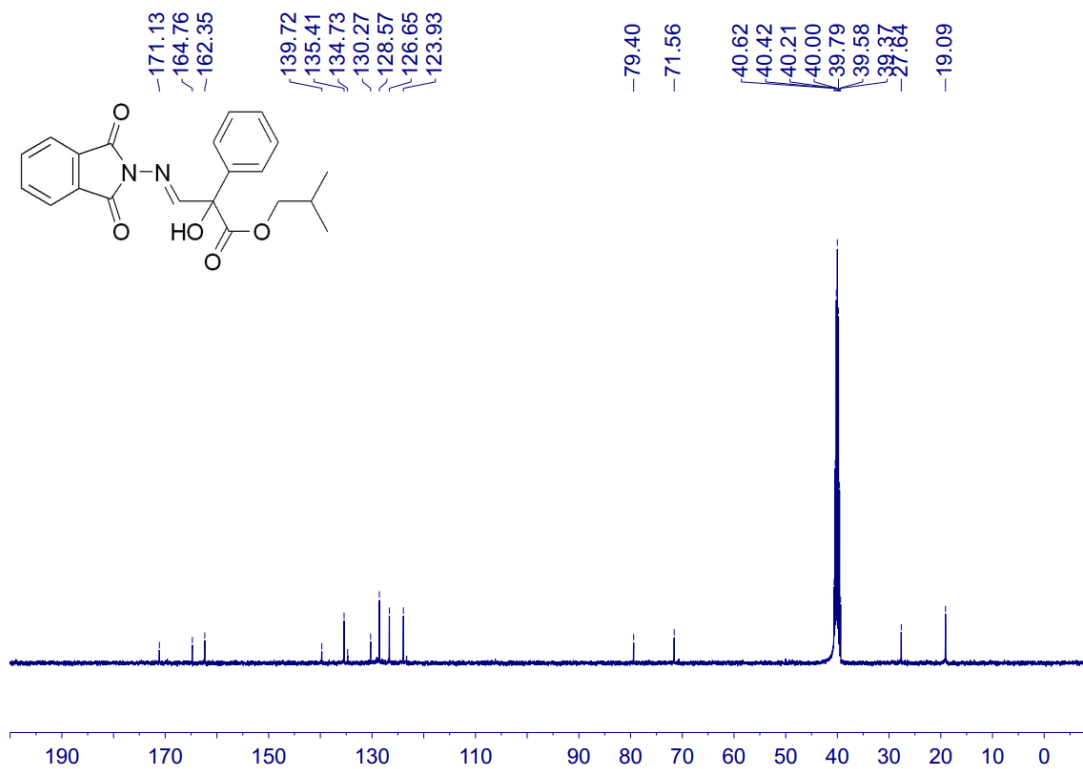

$^{13}\text{C}$  NMR Spectrum of Compound **4o** (100 MHz,  $\text{DMSO-}d_6$ )

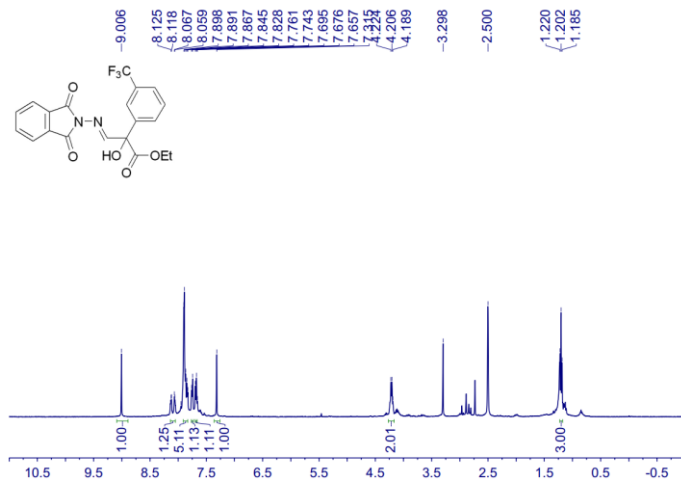

**<sup>1</sup>H NMR Spectrum of Compound 4q (400 MHz, DMSO-*d*<sub>6</sub>)**

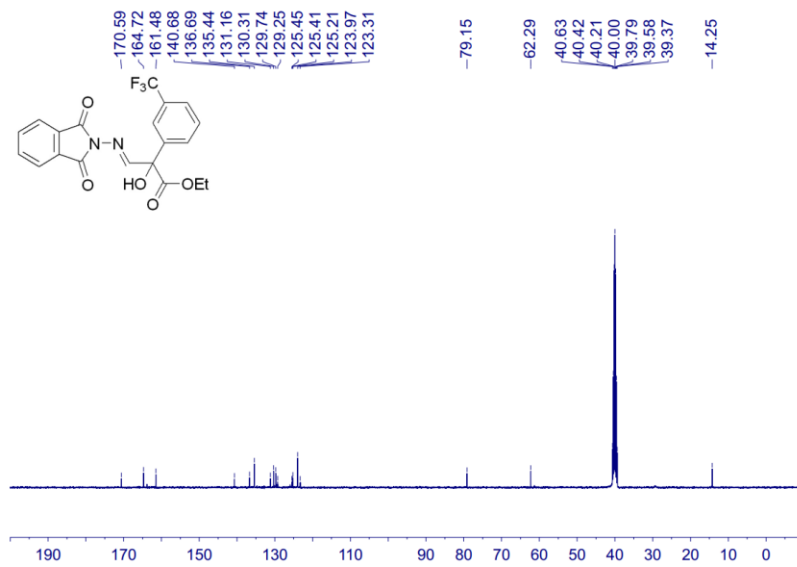

**<sup>13</sup>C NMR Spectrum of Compound 4q (100 MHz, DMSO-*d*<sub>6</sub>)**

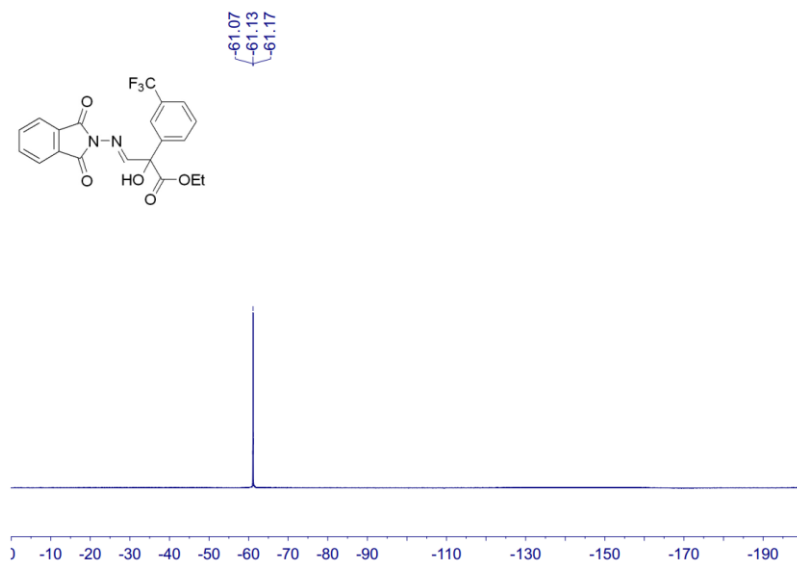

**<sup>19</sup>F NMR Spectrum of Compound 4i (376 MHz, DMSO-*d*<sub>6</sub>)**

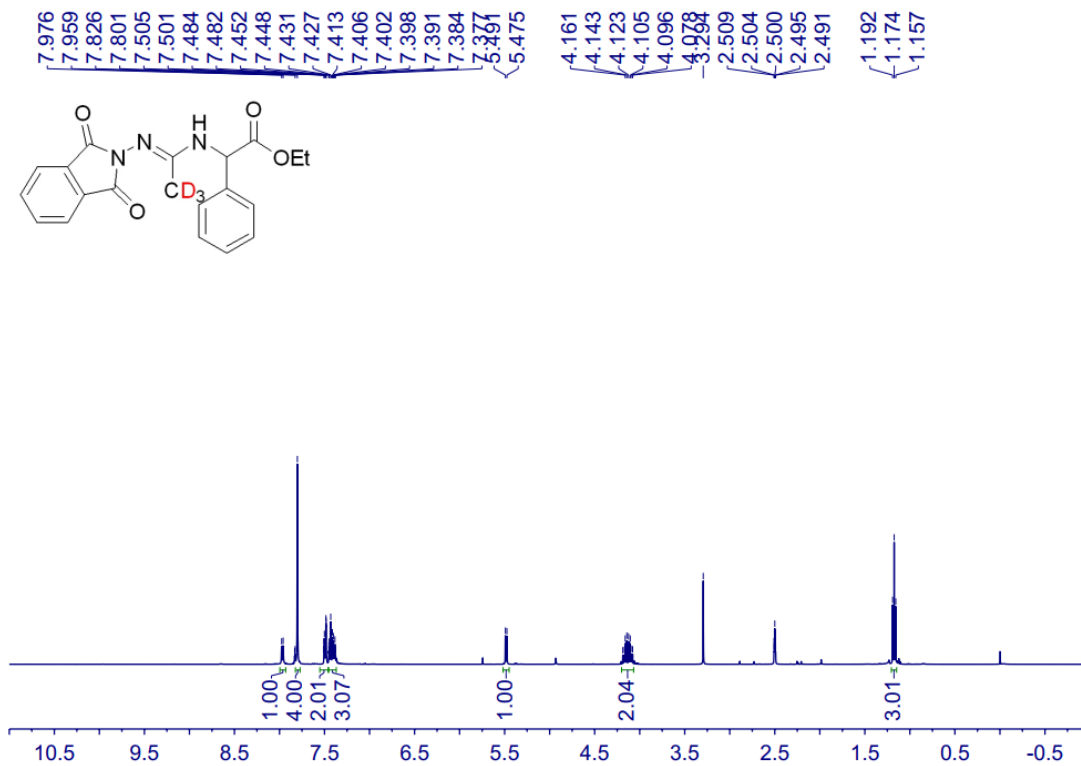

$^1\text{H}$  NMR Spectrum of Compound **3a'** (400 MHz,  $\text{DMSO-}d_6$ )

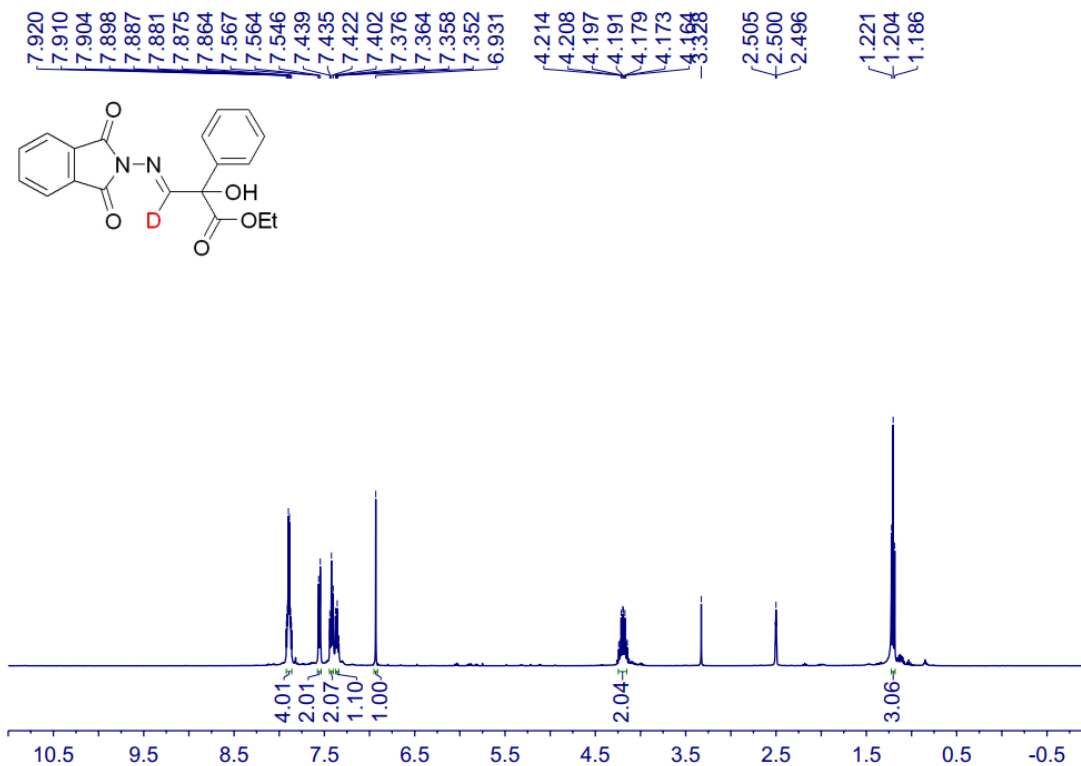

$^1\text{H}$  NMR Spectrum of Compound **4a'** (400 MHz,  $\text{DMSO-}d_6$ )

## 7. X-ray Diffraction Parameters and Data of 3n and 4k

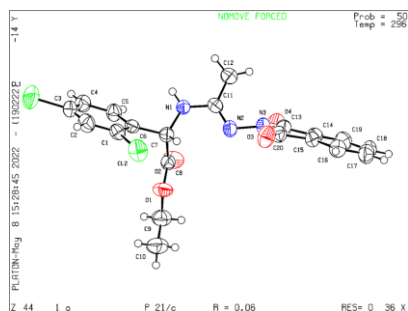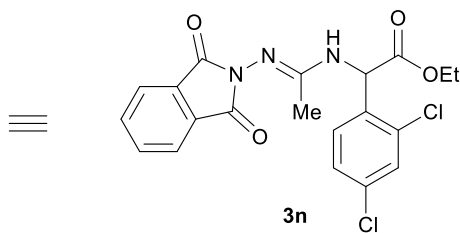

Bond precision: C-C = 0.0045 Å

Wavelength=0.71073

Cell: a=11.74000  
alpha=90

b=19.00700  
beta=95.3100

c=8.97600  
gamma=90

Temperature: 296 K

|                        | Calculated        | Reported          |
|------------------------|-------------------|-------------------|
| Volume                 | 1994.329          | 1994              |
| Space group            | P 21/c            | P 21/c            |
| Hall group             | -P 2ybc           | -P 2ybc           |
| Moiety formula         | C20 H17 Cl2 N3 O4 | ?                 |
| Sum formula            | C20 H17 Cl2 N3 O4 | C20 H17 Cl2 N3 O4 |
| Mr                     | 434.27            | 434.26            |
| Dx, g cm <sup>-3</sup> | 1.446             | 1.446             |
| Z                      | 4                 | 4                 |
| Mu (mm <sup>-1</sup> ) | 0.358             | 0.358             |
| F000                   | 896.0             | 896.0             |
| F000'                  | 897.56            |                   |
| h, k, lmax             | 13, 22, 10        | 13, 22, 10        |
| Nref                   | 3540              | 3536              |
| Tmin, Tmax             | 0.931, 0.931      | 0.864, 0.864      |
| Tmin'                  | 0.931             |                   |

Correction method= # Reported T Limits: Tmin=0.864 Tmax=0.864  
AbsCorr = MULTI-SCAN

Data completeness= 0.999

Theta(max)= 25.064

R(reflections)= 0.0644 ( 2265)

wR2(reflections)=  
0.1288 ( 3536)

S = 1.138

Npar= 264

The following ALERTS were generated. Each ALERT has the format  
**test-name\_ALERT\_alert-type\_alert-level.**  
Click on the hyperlinks for more details of the test.

**Alert level C**

|                                                           |               |
|-----------------------------------------------------------|---------------|
| PLAT141_ALERT_4_C s.u. on a - Axis Small or Missing ..... | 0.00000 Ang.  |
| PLAT142_ALERT_4_C s.u. on b - Axis Small or Missing ..... | 0.00000 Ang.  |
| PLAT143_ALERT_4_C s.u. on c - Axis Small or Missing ..... | 0.00000 Ang.  |
| PLAT145_ALERT_4_C s.u. on beta Small or Missing .....     | 0.0000 Degree |
| PLAT151_ALERT_1_C No s.u. (esd) Given on Volume .....     | Please Do !   |
| PLAT340_ALERT_3_C Low Bond Precision on C-C Bonds .....   | 0.0045 Ang.   |

**Alert level G**

|                                                                    |              |
|--------------------------------------------------------------------|--------------|
| PLAT007_ALERT_5_G Number of Unrefined Donor-H Atoms .....          | 1 Report     |
| PLAT767_ALERT_4_G INS Embedded LIST 6 Instruction Should be LIST 4 | Please Check |
| PLAT793_ALERT_4_G Model has Chirality at C7 (Centro SPGR)          | S Verify     |
| PLAT883_ALERT_1_G No Info/Value for _atom_sites_solution_primary . | Please Do !  |
| PLAT941_ALERT_3_G Average HKL Measurement Multiplicity .....       | 2.0 Low      |
| PLAT965_ALERT_2_G The SHELXL WEIGHT Optimisation has not Converged | Please Check |

0 **ALERT level A** = Most likely a serious problem - resolve or explain  
0 **ALERT level B** = A potentially serious problem, consider carefully  
6 **ALERT level C** = Check. Ensure it is not caused by an omission or oversight  
6 **ALERT level G** = General information/check it is not something unexpected

2 ALERT type 1 CIF construction/syntax error, inconsistent or missing data  
1 ALERT type 2 Indicator that the structure model may be wrong or deficient  
2 ALERT type 3 Indicator that the structure quality may be low  
6 ALERT type 4 Improvement, methodology, query or suggestion  
1 ALERT type 5 Informative message, check

**Figure S1** The single crystal analysis for **3n** (CCDC number: 2205769)

Table 1-1. Crystal data and structure refinement for 1\_a.

|                                 |                                                                               |             |
|---------------------------------|-------------------------------------------------------------------------------|-------------|
| Identification code             | 1_a                                                                           |             |
| Empirical formula               | C <sub>20</sub> H <sub>17</sub> Cl <sub>2</sub> N <sub>3</sub> O <sub>4</sub> |             |
| Formula weight                  | 434.26                                                                        |             |
| Temperature                     | 296(2) K                                                                      |             |
| Wavelength                      | 0.71073 Å                                                                     |             |
| Crystal system                  | Monoclinic                                                                    |             |
| Space group                     | P2 <sub>1</sub> /c                                                            |             |
| Unit cell dimensions            | a = 11.740 Å                                                                  | α = 90°.    |
|                                 | b = 19.007 Å                                                                  | β = 95.31°. |
|                                 | c = 8.976 Å                                                                   | γ = 90°.    |
| Volume                          | 1994.2 Å <sup>3</sup>                                                         |             |
| Z                               | 4                                                                             |             |
| Density (calculated)            | 1.446 Mg/m <sup>3</sup>                                                       |             |
| Absorption coefficient          | 0.358 mm <sup>-1</sup>                                                        |             |
| F(000)                          | 896                                                                           |             |
| Crystal size                    | 0.200 x 0.200 x 0.200 mm <sup>3</sup>                                         |             |
| Theta range for data collection | 2.143 to 25.064°.                                                             |             |
| Index ranges                    | 0 ≤ h ≤ 13, -22 ≤ k ≤ 22, -10 ≤ l ≤ 10                                        |             |

|                                   |                                             |
|-----------------------------------|---------------------------------------------|
| Reflections collected             | 6914                                        |
| Independent reflections           | 3536 [R(int) = 0.0453]                      |
| Completeness to theta = 25.064°   | 99.9 %                                      |
| Absorption correction             | Semi-empirical from equivalents             |
| Refinement method                 | Full-matrix least-squares on F <sup>2</sup> |
| Data / restraints / parameters    | 3536 / 0 / 264                              |
| Goodness-of-fit on F <sup>2</sup> | 1.138                                       |
| Final R indices [I > 2sigma(I)]   | R1 = 0.0644, wR2 = 0.1111                   |
| R indices (all data)              | R1 = 0.1256, wR2 = 0.1288                   |
| Extinction coefficient            | n/a                                         |
| Largest diff. peak and hole       | 0.185 and -0.226 e.Å <sup>-3</sup>          |

Table 1-2. Atomic coordinates ( $\times 10^4$ ) and equivalent isotropic displacement parameters ( $\text{\AA}^2 \times 10^3$ )

for 1\_a.  $U(\text{eq})$  is defined as one third of the trace of the orthogonalized  $U^{ij}$  tensor.

|       | x        | y       | z       | U(eq) |
|-------|----------|---------|---------|-------|
| C(7)  | 5042(2)  | 4014(1) | 2247(3) | 40(1) |
| C(15) | 8943(2)  | 5153(2) | 6757(3) | 43(1) |
| C(11) | 5746(3)  | 5100(2) | 3463(3) | 41(1) |
| C(8)  | 5861(2)  | 3908(2) | 1047(3) | 43(1) |
| C(6)  | 3885(2)  | 3699(1) | 1729(3) | 37(1) |
| C(5)  | 3211(3)  | 4014(2) | 575(3)  | 48(1) |
| C(14) | 9116(3)  | 5651(2) | 5685(3) | 44(1) |
| C(13) | 8169(3)  | 5606(2) | 4492(4) | 47(1) |
| C(20) | 7873(3)  | 4775(2) | 6294(3) | 47(1) |
| C(1)  | 3450(3)  | 3099(2) | 2353(3) | 45(1) |
| C(12) | 5522(3)  | 5865(2) | 3674(4) | 55(1) |
| C(16) | 9737(3)  | 5046(2) | 7950(3) | 54(1) |
| C(3)  | 1741(3)  | 3181(2) | 769(4)  | 53(1) |
| C(4)  | 2137(3)  | 3767(2) | 95(3)   | 54(1) |
| C(2)  | 2380(3)  | 2840(2) | 1886(4) | 55(1) |
| C(19) | 10096(3) | 6054(2) | 5776(4) | 57(1) |
| C(17) | 10720(3) | 5454(2) | 8054(4) | 61(1) |
| C(18) | 10896(3) | 5948(2) | 6977(4) | 62(1) |
| C(9)  | 7008(3)  | 3079(2) | -80(4)  | 68(1) |
| C(10) | 7413(3)  | 2345(2) | 219(5)  | 93(1) |
| Cl(1) | 382(1)   | 2875(1) | 165(1)  | 96(1) |
| Cl(2) | 4250(1)  | 2640(1) | 3763(1) | 69(1) |
| N(1)  | 4925(2)  | 4748(1) | 2600(3) | 44(1) |
| N(2)  | 6601(2)  | 4729(1) | 4020(3) | 46(1) |
| N(3)  | 7431(2)  | 5096(1) | 4956(3) | 45(1) |
| O(1)  | 6270(2)  | 3259(1) | 1075(2) | 57(1) |
| O(2)  | 6093(2)  | 4344(1) | 170(3)  | 64(1) |
| O(3)  | 7449(2)  | 4286(1) | 6887(3) | 66(1) |
| O(4)  | 8033(2)  | 5929(1) | 3332(3) | 64(1) |

Table 1-3. Bond lengths [ $\text{\AA}$ ] and angles [ $^\circ$ ] for 1\_a.

---

|              |          |
|--------------|----------|
| C(7)-N(1)    | 1.440(3) |
| C(7)-C(6)    | 1.517(4) |
| C(7)-C(8)    | 1.522(4) |
| C(7)-H(7)    | 0.9800   |
| C(15)-C(16)  | 1.368(4) |
| C(15)-C(14)  | 1.379(4) |
| C(15)-C(20)  | 1.473(4) |
| C(11)-N(2)   | 1.288(3) |
| C(11)-N(1)   | 1.357(3) |
| C(11)-C(12)  | 1.493(4) |
| C(8)-O(2)    | 1.192(3) |
| C(8)-O(1)    | 1.323(3) |
| C(6)-C(5)    | 1.381(4) |
| C(6)-C(1)    | 1.388(4) |
| C(5)-C(4)    | 1.377(4) |
| C(5)-H(5)    | 0.9300   |
| C(14)-C(19)  | 1.378(4) |
| C(14)-C(13)  | 1.472(4) |
| C(13)-O(4)   | 1.206(3) |
| C(13)-N(3)   | 1.390(4) |
| C(20)-O(3)   | 1.201(3) |
| C(20)-N(3)   | 1.403(4) |
| C(1)-C(2)    | 1.377(4) |
| C(1)-Cl(2)   | 1.740(3) |
| C(12)-H(12A) | 0.9600   |
| C(12)-H(12B) | 0.9600   |
| C(12)-H(12C) | 0.9600   |
| C(16)-C(17)  | 1.386(4) |
| C(16)-H(16)  | 0.9300   |
| C(3)-C(2)    | 1.361(4) |
| C(3)-C(4)    | 1.368(4) |
| C(3)-Cl(1)   | 1.737(3) |
| C(4)-H(4)    | 0.9300   |
| C(2)-H(2)    | 0.9300   |
| C(19)-C(18)  | 1.377(4) |
| C(19)-H(19)  | 0.9300   |



|                   |          |
|-------------------|----------|
| C(17)-C(18)       | 1.378(4) |
| C(17)-H(17)       | 0.9300   |
| C(18)-H(18)       | 0.9300   |
| C(9)-O(1)         | 1.452(4) |
| C(9)-C(10)        | 1.489(4) |
| C(9)-H(9A)        | 0.9700   |
| C(9)-H(9B)        | 0.9700   |
| C(10)-H(10A)      | 0.9600   |
| C(10)-H(10B)      | 0.9600   |
| C(10)-H(10C)      | 0.9600   |
| N(1)-H(1)         | 0.8600   |
| N(2)-N(3)         | 1.411(3) |
|                   |          |
| N(1)-C(7)-C(6)    | 110.3(2) |
| N(1)-C(7)-C(8)    | 111.3(2) |
| C(6)-C(7)-C(8)    | 109.7(2) |
| N(1)-C(7)-H(7)    | 108.5    |
| C(6)-C(7)-H(7)    | 108.5    |
| C(8)-C(7)-H(7)    | 108.5    |
| C(16)-C(15)-C(14) | 121.0(3) |
| C(16)-C(15)-C(20) | 130.5(3) |
| C(14)-C(15)-C(20) | 108.3(3) |
| N(2)-C(11)-N(1)   | 116.0(3) |
| N(2)-C(11)-C(12)  | 128.6(3) |
| N(1)-C(11)-C(12)  | 115.4(3) |
| O(2)-C(8)-O(1)    | 123.8(3) |
| O(2)-C(8)-C(7)    | 125.0(3) |
| O(1)-C(8)-C(7)    | 111.2(3) |
| C(5)-C(6)-C(1)    | 116.9(3) |
| C(5)-C(6)-C(7)    | 119.6(3) |
| C(1)-C(6)-C(7)    | 123.5(2) |
| C(4)-C(5)-C(6)    | 122.1(3) |
| C(4)-C(5)-H(5)    | 119.0    |
| C(6)-C(5)-H(5)    | 119.0    |
| C(19)-C(14)-C(15) | 121.1(3) |
| C(19)-C(14)-C(13) | 130.2(3) |
| C(15)-C(14)-C(13) | 108.5(3) |
| O(4)-C(13)-N(3)   | 125.2(3) |

|                     |          |
|---------------------|----------|
| O(4)-C(13)-C(14)    | 129.0(3) |
| N(3)-C(13)-C(14)    | 105.8(3) |
| O(3)-C(20)-N(3)     | 125.4(3) |
| O(3)-C(20)-C(15)    | 129.0(3) |
| N(3)-C(20)-C(15)    | 105.6(3) |
| C(2)-C(1)-C(6)      | 122.0(3) |
| C(2)-C(1)-Cl(2)     | 117.2(2) |
| C(6)-C(1)-Cl(2)     | 120.8(2) |
| C(11)-C(12)-H(12A)  | 109.5    |
| C(11)-C(12)-H(12B)  | 109.5    |
| H(12A)-C(12)-H(12B) | 109.5    |
| C(11)-C(12)-H(12C)  | 109.5    |
| H(12A)-C(12)-H(12C) | 109.5    |
| H(12B)-C(12)-H(12C) | 109.5    |
| C(15)-C(16)-C(17)   | 118.2(3) |
| C(15)-C(16)-H(16)   | 120.9    |
| C(17)-C(16)-H(16)   | 120.9    |
| C(2)-C(3)-C(4)      | 121.8(3) |
| C(2)-C(3)-Cl(1)     | 119.9(3) |
| C(4)-C(3)-Cl(1)     | 118.3(3) |
| C(3)-C(4)-C(5)      | 118.6(3) |
| C(3)-C(4)-H(4)      | 120.7    |
| C(5)-C(4)-H(4)      | 120.7    |
| C(3)-C(2)-C(1)      | 118.6(3) |
| C(3)-C(2)-H(2)      | 120.7    |
| C(1)-C(2)-H(2)      | 120.7    |
| C(18)-C(19)-C(14)   | 118.1(3) |
| C(18)-C(19)-H(19)   | 121.0    |
| C(14)-C(19)-H(19)   | 121.0    |
| C(18)-C(17)-C(16)   | 120.8(3) |
| C(18)-C(17)-H(17)   | 119.6    |
| C(16)-C(17)-H(17)   | 119.6    |
| C(19)-C(18)-C(17)   | 120.9(3) |
| C(19)-C(18)-H(18)   | 119.5    |
| C(17)-C(18)-H(18)   | 119.5    |
| O(1)-C(9)-C(10)     | 107.1(3) |
| O(1)-C(9)-H(9A)     | 110.3    |
| C(10)-C(9)-H(9A)    | 110.3    |

|                     |          |
|---------------------|----------|
| O(1)-C(9)-H(9B)     | 110.3    |
| C(10)-C(9)-H(9B)    | 110.3    |
| H(9A)-C(9)-H(9B)    | 108.5    |
| C(9)-C(10)-H(10A)   | 109.5    |
| C(9)-C(10)-H(10B)   | 109.5    |
| H(10A)-C(10)-H(10B) | 109.5    |
| C(9)-C(10)-H(10C)   | 109.5    |
| H(10A)-C(10)-H(10C) | 109.5    |
| H(10B)-C(10)-H(10C) | 109.5    |
| C(11)-N(1)-C(7)     | 121.7(2) |
| C(11)-N(1)-H(1)     | 119.1    |
| C(7)-N(1)-H(1)      | 119.1    |
| C(11)-N(2)-N(3)     | 115.5(2) |
| C(13)-N(3)-C(20)    | 111.6(2) |
| C(13)-N(3)-N(2)     | 125.6(2) |
| C(20)-N(3)-N(2)     | 118.4(2) |
| C(8)-O(1)-C(9)      | 116.5(2) |

---

Symmetry transformations used to generate equivalent atoms:

Table 1-4. Anisotropic displacement parameters ( $\text{\AA}^2 \times 10^3$ ) for 1\_a. The anisotropic displacement factor exponent takes the form:  $-2\pi^2 [ h^2 a^{*2} U^{11} + \dots + 2 h k a^* b^* U^{12} ]$

|       | U <sup>11</sup> | U <sup>22</sup> | U <sup>33</sup> | U <sup>23</sup> | U <sup>13</sup> | U <sup>12</sup> |
|-------|-----------------|-----------------|-----------------|-----------------|-----------------|-----------------|
| C(7)  | 40(2)           | 36(2)           | 42(2)           | 2(1)            | 0(1)            | 1(1)            |
| C(15) | 41(2)           | 46(2)           | 42(2)           | -7(2)           | 1(2)            | -1(2)           |
| C(11) | 46(2)           | 37(2)           | 40(2)           | -3(2)           | 9(2)            | -3(2)           |
| C(8)  | 40(2)           | 35(2)           | 52(2)           | -1(2)           | -3(2)           | 0(2)            |
| C(6)  | 40(2)           | 32(2)           | 40(2)           | -3(1)           | 5(1)            | 2(1)            |
| C(5)  | 50(2)           | 43(2)           | 50(2)           | 3(2)            | -1(2)           | -6(2)           |
| C(14) | 45(2)           | 38(2)           | 49(2)           | -4(2)           | 7(2)            | -2(2)           |
| C(13) | 45(2)           | 46(2)           | 48(2)           | 1(2)            | 2(2)            | -2(2)           |
| C(20) | 44(2)           | 46(2)           | 50(2)           | 1(2)            | 5(2)            | -3(2)           |
| C(1)  | 53(2)           | 36(2)           | 45(2)           | 1(2)            | 4(2)            | -3(2)           |
| C(12) | 54(2)           | 42(2)           | 68(2)           | -6(2)           | 4(2)            | 1(2)            |
| C(16) | 53(2)           | 56(2)           | 54(2)           | 0(2)            | 4(2)            | -2(2)           |
| C(3)  | 39(2)           | 51(2)           | 69(2)           | -15(2)          | 1(2)            | -7(2)           |
| C(4)  | 53(2)           | 53(2)           | 55(2)           | -3(2)           | -9(2)           | 3(2)            |
| C(2)  | 60(2)           | 44(2)           | 63(2)           | 0(2)            | 10(2)           | -14(2)          |
| C(19) | 60(2)           | 41(2)           | 69(2)           | -1(2)           | 6(2)            | -9(2)           |
| C(17) | 57(2)           | 65(2)           | 59(2)           | -4(2)           | -8(2)           | -4(2)           |
| C(18) | 47(2)           | 56(2)           | 80(3)           | -7(2)           | -6(2)           | -11(2)          |
| C(9)  | 59(2)           | 64(2)           | 85(3)           | -15(2)          | 21(2)           | 3(2)            |
| C(10) | 72(3)           | 66(3)           | 142(4)          | -24(3)          | 12(3)           | 20(2)           |
| Cl(1) | 56(1)           | 89(1)           | 140(1)          | -19(1)          | -11(1)          | -23(1)          |
| Cl(2) | 90(1)           | 46(1)           | 68(1)           | 18(1)           | -9(1)           | -7(1)           |
| N(1)  | 38(1)           | 35(2)           | 56(2)           | -6(1)           | -6(1)           | 4(1)            |
| N(2)  | 44(2)           | 44(2)           | 49(2)           | -5(1)           | -4(1)           | -5(1)           |
| N(3)  | 44(2)           | 44(2)           | 44(2)           | -2(1)           | -2(1)           | -6(1)           |
| O(1)  | 60(1)           | 39(1)           | 76(2)           | -1(1)           | 23(1)           | 9(1)            |
| O(2)  | 73(2)           | 53(2)           | 71(2)           | 12(1)           | 28(1)           | 4(1)            |
| O(3)  | 57(2)           | 68(2)           | 72(2)           | 18(1)           | -1(1)           | -15(1)          |
| O(4)  | 63(2)           | 71(2)           | 58(1)           | 16(1)           | 1(1)            | -9(1)           |

Table 1-5. Hydrogen coordinates ( $\times 10^4$ ) and isotropic displacement parameters ( $\text{\AA}^2 \times 10^{-3}$ ) for 1\_a.

|        | x     | y    | z     | U(eq) |
|--------|-------|------|-------|-------|
| H(7)   | 5350  | 3767 | 3154  | 47    |
| H(5)   | 3491  | 4406 | 107   | 57    |
| H(12A) | 5906  | 6019 | 4608  | 82    |
| H(12B) | 4714  | 5942 | 3679  | 82    |
| H(12C) | 5803  | 6127 | 2869  | 82    |
| H(16)  | 9621  | 4708 | 8671  | 65    |
| H(4)   | 1690  | 3993 | -671  | 65    |
| H(2)   | 2101  | 2440 | 2326  | 66    |
| H(19)  | 10214 | 6387 | 5047  | 68    |
| H(17)  | 11268 | 5393 | 8861  | 74    |
| H(18)  | 11563 | 6215 | 7062  | 74    |
| H(9A)  | 7653  | 3399 | -49   | 82    |
| H(9B)  | 6589  | 3109 | -1061 | 82    |
| H(10A) | 7841  | 2324 | 1182  | 140   |
| H(10B) | 7893  | 2204 | -538  | 140   |
| H(10C) | 6767  | 2035 | 204   | 140   |
| H(1)   | 4318  | 4969 | 2254  | 52    |

Table 1-6. Torsion angles [°] for 1\_a.

---

|                         |           |
|-------------------------|-----------|
| N(1)-C(7)-C(8)-O(2)     | -22.6(4)  |
| C(6)-C(7)-C(8)-O(2)     | 99.8(3)   |
| N(1)-C(7)-C(8)-O(1)     | 158.8(2)  |
| C(6)-C(7)-C(8)-O(1)     | -78.8(3)  |
| N(1)-C(7)-C(6)-C(5)     | 53.3(3)   |
| C(8)-C(7)-C(6)-C(5)     | -69.7(3)  |
| N(1)-C(7)-C(6)-C(1)     | -126.8(3) |
| C(8)-C(7)-C(6)-C(1)     | 110.2(3)  |
| C(1)-C(6)-C(5)-C(4)     | 2.5(4)    |
| C(7)-C(6)-C(5)-C(4)     | -177.6(3) |
| C(16)-C(15)-C(14)-C(19) | 0.3(5)    |
| C(20)-C(15)-C(14)-C(19) | -175.7(3) |
| C(16)-C(15)-C(14)-C(13) | 175.5(3)  |
| C(20)-C(15)-C(14)-C(13) | -0.5(3)   |
| C(19)-C(14)-C(13)-O(4)  | -1.8(6)   |
| C(15)-C(14)-C(13)-O(4)  | -176.4(3) |
| C(19)-C(14)-C(13)-N(3)  | 177.6(3)  |
| C(15)-C(14)-C(13)-N(3)  | 3.0(3)    |
| C(16)-C(15)-C(20)-O(3)  | 1.0(6)    |
| C(14)-C(15)-C(20)-O(3)  | 176.6(3)  |
| C(16)-C(15)-C(20)-N(3)  | -177.7(3) |
| C(14)-C(15)-C(20)-N(3)  | -2.1(3)   |
| C(5)-C(6)-C(1)-C(2)     | -2.2(4)   |
| C(7)-C(6)-C(1)-C(2)     | 178.0(3)  |
| C(5)-C(6)-C(1)-Cl(2)    | 177.4(2)  |
| C(7)-C(6)-C(1)-Cl(2)    | -2.5(4)   |
| C(14)-C(15)-C(16)-C(17) | 0.2(5)    |
| C(20)-C(15)-C(16)-C(17) | 175.3(3)  |
| C(2)-C(3)-C(4)-C(5)     | -0.3(5)   |
| Cl(1)-C(3)-C(4)-C(5)    | 179.6(2)  |
| C(6)-C(5)-C(4)-C(3)     | -1.3(5)   |
| C(4)-C(3)-C(2)-C(1)     | 0.6(5)    |
| Cl(1)-C(3)-C(2)-C(1)    | -179.3(2) |
| C(6)-C(1)-C(2)-C(3)     | 0.7(5)    |
| Cl(2)-C(1)-C(2)-C(3)    | -179.0(2) |
| C(15)-C(14)-C(19)-C(18) | -0.5(5)   |

|                         |           |
|-------------------------|-----------|
| C(13)-C(14)-C(19)-C(18) | -174.5(3) |
| C(15)-C(16)-C(17)-C(18) | -0.6(5)   |
| C(14)-C(19)-C(18)-C(17) | 0.1(5)    |
| C(16)-C(17)-C(18)-C(19) | 0.5(5)    |
| N(2)-C(11)-N(1)-C(7)    | -4.0(4)   |
| C(12)-C(11)-N(1)-C(7)   | 177.4(3)  |
| C(6)-C(7)-N(1)-C(11)    | 161.3(2)  |
| C(8)-C(7)-N(1)-C(11)    | -76.6(3)  |
| N(1)-C(11)-N(2)-N(3)    | -178.0(2) |
| C(12)-C(11)-N(2)-N(3)   | 0.3(4)    |
| O(4)-C(13)-N(3)-C(20)   | 175.0(3)  |
| C(14)-C(13)-N(3)-C(20)  | -4.4(3)   |
| O(4)-C(13)-N(3)-N(2)    | 19.1(5)   |
| C(14)-C(13)-N(3)-N(2)   | -160.3(2) |
| O(3)-C(20)-N(3)-C(13)   | -174.6(3) |
| C(15)-C(20)-N(3)-C(13)  | 4.1(3)    |
| O(3)-C(20)-N(3)-N(2)    | -16.8(4)  |
| C(15)-C(20)-N(3)-N(2)   | 161.9(2)  |
| C(11)-N(2)-N(3)-C(13)   | -69.0(4)  |
| C(11)-N(2)-N(3)-C(20)   | 136.7(3)  |
| O(2)-C(8)-O(1)-C(9)     | -2.4(4)   |
| C(7)-C(8)-O(1)-C(9)     | 176.3(2)  |
| C(10)-C(9)-O(1)-C(8)    | 177.0(3)  |

---

Symmetry transformations used to generate equivalent atoms:

Table 1-7. Hydrogen bonds for 1\_a [Å and °].

---

| D-H...A | d(D-H) | d(H...A) | d(D...A) | <(DHA) |
|---------|--------|----------|----------|--------|
|---------|--------|----------|----------|--------|

---



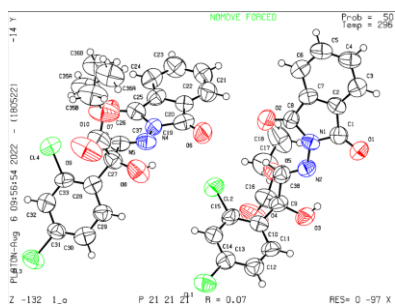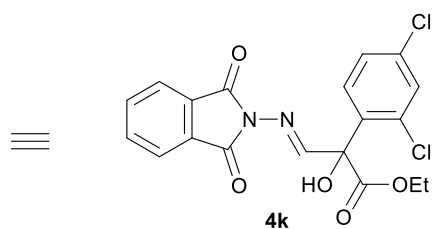

Bond precision: C-C = 0.0119 Å

Wavelength=0.71073

Cell: a=13.1812 (18)  
alpha=90

b=14.144 (2)  
beta=90

c=20.391 (3)  
gamma=90

Temperature: 296 K

|                        | Calculated        | Reported          |
|------------------------|-------------------|-------------------|
| Volume                 | 3801.6 (9)        | 3801.6 (9)        |
| Space group            | P 21 21 21        | P 21 21 21        |
| Hall group             | P 2ac 2ab         | P 2ac 2ab         |
| Moiety formula         | C19 H14 Cl2 N2 O5 | ?                 |
| Sum formula            | C19 H14 Cl2 N2 O5 | C19 H14 Cl2 N2 O5 |
| Mr                     | 421.22            | 421.22            |
| Dx, g cm <sup>-3</sup> | 1.472             | 1.472             |
| Z                      | 8                 | 8                 |
| Mu (mm <sup>-1</sup> ) | 0.376             | 0.376             |
| F000                   | 1728.0            | 1728.0            |
| F000'                  | 1731.17           |                   |
| h, k, lmax             | 15, 16, 24        | 15, 16, 24        |
| Nref                   | 6682 [ 3738]      | 6675              |
| Tmin, Tmax             | 0.928, 0.928      | 0.864, 0.864      |
| Tmin'                  | 0.928             |                   |

Correction method= # Reported T Limits: Tmin=0.864 Tmax=0.864  
AbsCorr = MULTI-SCAN

Data completeness= 1.79/1.00

Theta (max)= 24.998

R(reflections)= 0.0690 ( 2768)

wR2(reflections)=  
0.1926 ( 6675)

S = 0.970

Npar= 477

The following ALERTS were generated. Each ALERT has the format  
**test-name\_ALERT\_alert-type\_alert-level.**  
Click on the hyperlinks for more details of the test.

**Alert level B**  
PLAT340\_ALERT\_3\_B Low Bond Precision on C-C Bonds ..... 0.01191 Ang.

**Author Response: This is caused by the poor diffraction of the sample.**

**Alert level C**  
RINTA01\_ALERT\_3\_C The value of Rint is greater than 0.12  
Rint given 0.125  
PLAT026\_ALERT\_3\_C Ratio Observed / Unique Reflections (too) Low .. 41% Check  
PLAT234\_ALERT\_4\_C Large Hirshfeld Difference N4 --C19 . 0.20 Ang.  
PLAT234\_ALERT\_4\_C Large Hirshfeld Difference N4 --C26 . 0.16 Ang.  
PLAT234\_ALERT\_4\_C Large Hirshfeld Difference C23 --C24 . 0.17 Ang.  
PLAT234\_ALERT\_4\_C Large Hirshfeld Difference C25 --C26 . 0.16 Ang.  
PLAT234\_ALERT\_4\_C Large Hirshfeld Difference C29 --C30 . 0.17 Ang.  
PLAT234\_ALERT\_4\_C Large Hirshfeld Difference C9 --C10 . 0.19 Ang.  
PLAT242\_ALERT\_2\_C Low 'MainMol' Ueq as Compared to Neighbors of C31 Check  
PLAT242\_ALERT\_2\_C Low 'MainMol' Ueq as Compared to Neighbors of C34 Check

**Alert level G**  
PLAT002\_ALERT\_2\_G Number of Distance or Angle Restraints on AtSite 5 Note  
PLAT003\_ALERT\_2\_G Number of Uiso or Uij Restrained non-H Atoms ... 5 Report  
PLAT007\_ALERT\_5\_G Number of Unrefined Donor-H Atoms ..... 2 Report  
PLAT020\_ALERT\_3\_G The Value of Rint is Greater Than 0.12 ..... 0.125 Report  
PLAT172\_ALERT\_4\_G The CIF-Embedded .res File Contains DFIX Records 2 Report  
PLAT177\_ALERT\_4\_G The CIF-Embedded .res File Contains DELU Records 1 Report  
PLAT178\_ALERT\_4\_G The CIF-Embedded .res File Contains SIMU Records 1 Report  
PLAT301\_ALERT\_3\_G Main Residue Disorder .....(Resd 1 ) 7% Note  
PLAT398\_ALERT\_2\_G Deviating C-O-C Angle From 120 for O10 . 107.1 Degree  
PLAT431\_ALERT\_2\_G Short Inter HL..A Contact C12 .06 . 3.02 Ang.  
x,y,z = 1\_555 Check  
PLAT767\_ALERT\_4\_G INS Embedded LIST 6 Instruction Should be LIST 4 Please Check  
PLAT791\_ALERT\_4\_G Model has Chirality at C9 (Sohnke SpGr) S Verify  
PLAT791\_ALERT\_4\_G Model has Chirality at C27 (Sohnke SpGr) R Verify  
PLAT860\_ALERT\_3\_G Number of Least-Squares Restraints ..... 58 Note  
PLAT883\_ALERT\_1\_G No Info/Value for \_atom\_sites\_solution\_primary . Please Do !  
PLAT967\_ALERT\_5\_G Note: Two-Theta Cutoff Value in Embedded .res .. 50.0 Degree

0 ALERT level A - Most likely a serious problem - resolve or explain  
1 ALERT level B - A potentially serious problem, consider carefully  
10 ALERT level C - Check. Ensure it is not caused by an omission or oversight  
16 ALERT level G - General information/check it is not something unexpected  
1 ALERT type 1 CIF construction/syntax error, inconsistent or missing data

**Figure S2** The single crystal analysis for **4k** (CCDC number: 2205670)

Table 2-1. Crystal data and structure refinement for 1\_a.

|                        |                                               |          |
|------------------------|-----------------------------------------------|----------|
| Identification code    | 1_a                                           |          |
| Empirical formula      | C19 H14 Cl2 N2 O5                             |          |
| Formula weight         | 421.22                                        |          |
| Temperature            | 296(2) K                                      |          |
| Wavelength             | 0.71073 Å                                     |          |
| Crystal system         | Orthorhombic                                  |          |
| Space group            | P2 <sub>1</sub> 2 <sub>1</sub> 2 <sub>1</sub> |          |
| Unit cell dimensions   | a = 13.1812(18) Å                             | α = 90°. |
|                        | b = 14.144(2) Å                               | β = 90°. |
|                        | c = 20.391(3) Å                               | γ = 90°. |
| Volume                 | 3801.6(9) Å <sup>3</sup>                      |          |
| Z                      | 8                                             |          |
| Density (calculated)   | 1.472 Mg/m <sup>3</sup>                       |          |
| Absorption coefficient | 0.376 mm <sup>-1</sup>                        |          |
| F(000)                 | 1728                                          |          |
| Crystal size           | 0.200 x 0.200 x 0.200 mm <sup>3</sup>         |          |

|                                   |                                             |
|-----------------------------------|---------------------------------------------|
| Theta range for data collection   | 2.112 to 24.998°.                           |
| Index ranges                      | -13<=h<=15, -16<=k<=16, -20<=l<=24          |
| Reflections collected             | 32402                                       |
| Independent reflections           | 6675 [R(int) = 0.1249]                      |
| Completeness to theta = 24.998°   | 99.9 %                                      |
| Absorption correction             | Semi-empirical from equivalents             |
| Refinement method                 | Full-matrix least-squares on F <sup>2</sup> |
| Data / restraints / parameters    | 6675 / 58 / 477                             |
| Goodness-of-fit on F <sup>2</sup> | 0.970                                       |
| Final R indices [I>2sigma(I)]     | R1 = 0.0690, wR2 = 0.1484                   |
| R indices (all data)              | R1 = 0.2151, wR2 = 0.1926                   |
| Absolute structure parameter      | 0.05(6)                                     |
| Extinction coefficient            | n/a                                         |
| Largest diff. peak and hole       | 0.223 and -0.245 e.Å <sup>-3</sup>          |

Table 2-2. Atomic coordinates ( $\times 10^4$ ) and equivalent isotropic displacement parameters ( $\text{\AA}^2 \times 10^3$ ) for 1\_a.  $U(\text{eq})$  is defined as one third of the trace of the orthogonalized  $U^j$  tensor.

|       | x        | y        | z        | U(eq)  |
|-------|----------|----------|----------|--------|
| C(1)  | 2165(9)  | 6066(8)  | 9109(5)  | 72(3)  |
| C(2)  | 2861(5)  | 6675(4)  | 9476(4)  | 66(3)  |
| C(3)  | 2745(5)  | 7142(5)  | 10071(4) | 75(3)  |
| C(4)  | 3533(7)  | 7689(5)  | 10319(3) | 83(3)  |
| C(5)  | 4435(6)  | 7770(5)  | 9971(5)  | 89(4)  |
| C(6)  | 4551(5)  | 7303(6)  | 9376(4)  | 82(3)  |
| C(7)  | 3764(6)  | 6755(5)  | 9129(3)  | 67(3)  |
| C(8)  | 3697(8)  | 6181(7)  | 8533(5)  | 65(3)  |
| C(9)  | 2248(8)  | 4141(8)  | 7191(5)  | 74(3)  |
| C(10) | 2038(6)  | 4569(4)  | 6517(3)  | 64(3)  |
| C(15) | 2823(4)  | 4872(5)  | 6113(4)  | 67(3)  |
| C(14) | 2605(5)  | 5293(5)  | 5513(3)  | 72(3)  |
| C(13) | 1603(6)  | 5410(4)  | 5318(3)  | 74(3)  |
| C(12) | 818(4)   | 5107(5)  | 5722(4)  | 82(3)  |
| C(11) | 1036(5)  | 4687(5)  | 6322(3)  | 76(3)  |
| C(16) | 2917(10) | 3240(8)  | 7146(7)  | 87(4)  |
| C(17) | 4112(11) | 2320(10) | 7721(7)  | 121(5) |
| C(18) | 4513(12) | 2204(11) | 8373(6)  | 139(6) |
| C(19) | 6820(9)  | 3826(8)  | 6867(6)  | 79(3)  |
| C(20) | 7479(5)  | 3189(5)  | 7211(4)  | 70(3)  |
| C(21) | 7363(6)  | 2762(6)  | 7821(4)  | 86(3)  |
| C(22) | 8130(8)  | 2193(5)  | 8071(3)  | 87(3)  |
| C(23) | 9014(6)  | 2050(5)  | 7712(5)  | 97(4)  |
| C(24) | 9130(5)  | 2476(6)  | 7103(4)  | 86(3)  |
| C(25) | 8363(6)  | 3046(5)  | 6852(3)  | 68(3)  |
| C(26) | 8308(9)  | 3585(7)  | 6243(6)  | 70(3)  |
| C(27) | 6955(9)  | 5683(8)  | 4932(5)  | 73(3)  |
| C(28) | 6862(6)  | 5286(4)  | 4231(3)  | 65(3)  |
| C(33) | 7713(4)  | 5129(5)  | 3843(4)  | 68(3)  |
| C(32) | 7603(5)  | 4780(5)  | 3210(3)  | 76(3)  |
| C(31) | 6641(6)  | 4587(4)  | 2965(3)  | 69(3)  |
| C(30) | 5790(5)  | 4744(5)  | 3352(4)  | 81(3)  |
| C(29) | 5901(5)  | 5094(5)  | 3985(3)  | 73(3)  |

|        |          |          |          |        |
|--------|----------|----------|----------|--------|
| C(34)  | 7577(11) | 6616(9)  | 4922(7)  | 96(4)  |
| C(35A) | 9120(20) | 7350(20) | 5440(20) | 123(6) |
| C(36A) | 8750(40) | 7910(20) | 5999(16) | 126(8) |
| C(36B) | 9440(20) | 7510(20) | 5958(14) | 121(7) |
| C(35B) | 8690(20) | 7601(15) | 5425(16) | 125(5) |
| CI(1)  | 1330(2)  | 5905(2)  | 4574(1)  | 96(1)  |
| CI(2)  | 4075(2)  | 4699(2)  | 6305(1)  | 90(1)  |
| CI(3)  | 6524(3)  | 4203(3)  | 2164(1)  | 108(1) |
| CI(4)  | 8912(2)  | 5342(3)  | 4106(2)  | 103(1) |
| N(1)   | 2723(7)  | 5794(6)  | 8549(4)  | 63(2)  |
| N(2)   | 2276(6)  | 5125(6)  | 8135(5)  | 69(2)  |
| C(38)  | 2767(8)  | 4890(7)  | 7631(5)  | 71(3)  |
| N(4)   | 7343(6)  | 4033(6)  | 6266(4)  | 65(2)  |
| N(5)   | 6945(6)  | 4685(6)  | 5856(5)  | 72(2)  |
| C(37)  | 7439(8)  | 4951(7)  | 5355(5)  | 69(3)  |
| O(1)   | 1329(6)  | 5800(6)  | 9238(4)  | 90(2)  |
| O(2)   | 4308(6)  | 6061(6)  | 8116(4)  | 95(3)  |
| O(3)   | 1340(5)  | 3826(5)  | 7470(3)  | 83(2)  |
| O(4)   | 2886(8)  | 2718(6)  | 6709(4)  | 126(4) |
| O(5)   | 3462(6)  | 3147(5)  | 7686(4)  | 90(2)  |
| O(6)   | 5995(6)  | 4105(7)  | 6996(4)  | 106(3) |
| O(7)   | 8913(5)  | 3650(5)  | 5813(4)  | 88(2)  |
| O(8)   | 5985(7)  | 5917(6)  | 5163(4)  | 105(3) |
| O(9)   | 7467(9)  | 7202(6)  | 4520(5)  | 140(4) |
| O(10)  | 8214(7)  | 6646(5)  | 5426(5)  | 127(3) |

---

Table 2-3. Bond lengths [ $\text{\AA}$ ] and angles [ $^\circ$ ] for 1\_a.

---

|              |           |
|--------------|-----------|
| C(1)-O(1)    | 1.193(12) |
| C(1)-N(1)    | 1.412(12) |
| C(1)-C(2)    | 1.464(12) |
| C(2)-C(3)    | 1.3900    |
| C(2)-C(7)    | 1.3900    |
| C(3)-C(4)    | 1.3900    |
| C(3)-H(3)    | 0.9300    |
| C(4)-C(5)    | 1.3900    |
| C(4)-H(4)    | 0.9300    |
| C(5)-C(6)    | 1.3900    |
| C(5)-H(5)    | 0.9300    |
| C(6)-C(7)    | 1.3900    |
| C(6)-H(6)    | 0.9300    |
| C(7)-C(8)    | 1.465(12) |
| C(8)-O(2)    | 1.182(10) |
| C(8)-N(1)    | 1.396(13) |
| C(9)-O(3)    | 1.397(11) |
| C(9)-C(10)   | 1.527(11) |
| C(9)-C(38)   | 1.547(13) |
| C(9)-C(16)   | 1.552(15) |
| C(10)-C(15)  | 1.3900    |
| C(10)-C(11)  | 1.3900    |
| C(15)-C(14)  | 1.3900    |
| C(15)-Cl(2)  | 1.714(6)  |
| C(14)-C(13)  | 1.3900    |
| C(14)-H(14)  | 0.9300    |
| C(13)-C(12)  | 1.3900    |
| C(13)-Cl(1)  | 1.708(6)  |
| C(12)-C(11)  | 1.3900    |
| C(12)-H(12)  | 0.9300    |
| C(11)-H(11)  | 0.9300    |
| C(16)-O(4)   | 1.156(12) |
| C(16)-O(5)   | 1.322(13) |
| C(17)-C(18)  | 1.440(15) |
| C(17)-O(5)   | 1.451(13) |
| C(17)-H(17A) | 0.9700    |

|               |           |
|---------------|-----------|
| C(17)-H(17B)  | 0.9700    |
| C(18)-H(18A)  | 0.9600    |
| C(18)-H(18B)  | 0.9600    |
| C(18)-H(18C)  | 0.9600    |
| C(19)-O(6)    | 1.186(12) |
| C(19)-C(20)   | 1.436(12) |
| C(19)-N(4)    | 1.436(13) |
| C(20)-C(21)   | 1.3900    |
| C(20)-C(25)   | 1.3900    |
| C(21)-C(22)   | 1.3900    |
| C(21)-H(21)   | 0.9300    |
| C(22)-C(23)   | 1.3900    |
| C(22)-H(22)   | 0.9300    |
| C(23)-C(24)   | 1.3900    |
| C(23)-H(23)   | 0.9300    |
| C(24)-C(25)   | 1.3900    |
| C(24)-H(24)   | 0.9300    |
| C(25)-C(26)   | 1.459(12) |
| C(26)-O(7)    | 1.190(12) |
| C(26)-N(4)    | 1.422(13) |
| C(27)-O(8)    | 1.402(12) |
| C(27)-C(37)   | 1.490(13) |
| C(27)-C(28)   | 1.542(11) |
| C(27)-C(34)   | 1.553(16) |
| C(28)-C(33)   | 1.3900    |
| C(28)-C(29)   | 1.3900    |
| C(33)-C(32)   | 1.3900    |
| C(33)-Cl(4)   | 1.695(6)  |
| C(32)-C(31)   | 1.3900    |
| C(32)-H(32)   | 0.9300    |
| C(31)-C(30)   | 1.3900    |
| C(31)-Cl(3)   | 1.727(6)  |
| C(30)-C(29)   | 1.3900    |
| C(30)-H(30)   | 0.9300    |
| C(29)-H(29)   | 0.9300    |
| C(34)-O(9)    | 1.174(13) |
| C(34)-O(10)   | 1.328(14) |
| C(35A)-C(36A) | 1.47(3)   |

|                |           |
|----------------|-----------|
| C(35A)-O(10)   | 1.55(2)   |
| C(35A)-H(35A)  | 0.9700    |
| C(35A)-H(35B)  | 0.9700    |
| C(36A)-H(36A)  | 0.9600    |
| C(36A)-H(36B)  | 0.9600    |
| C(36A)-H(36C)  | 0.9600    |
| C(36B)-C(35B)  | 1.48(2)   |
| C(36B)-H(36D)  | 0.9600    |
| C(36B)-H(36E)  | 0.9600    |
| C(36B)-H(36F)  | 0.9600    |
| C(35B)-O(10)   | 1.490(19) |
| C(35B)-H(35C)  | 0.9700    |
| C(35B)-H(35D)  | 0.9700    |
| N(1)-N(2)      | 1.399(10) |
| N(2)-C(38)     | 1.260(11) |
| C(38)-H(38)    | 0.9300    |
| N(4)-N(5)      | 1.350(10) |
| N(5)-C(37)     | 1.269(12) |
| C(37)-H(37)    | 0.9300    |
| O(3)-H(3A)     | 0.8199    |
| O(8)-H(8)      | 0.8201    |
| O(1)-C(1)-N(1) | 125.0(11) |
| O(1)-C(1)-C(2) | 130.7(11) |
| N(1)-C(1)-C(2) | 104.3(9)  |
| C(3)-C(2)-C(7) | 120.0     |
| C(3)-C(2)-C(1) | 131.1(8)  |
| C(7)-C(2)-C(1) | 108.9(8)  |
| C(2)-C(3)-C(4) | 120.0     |
| C(2)-C(3)-H(3) | 120.0     |
| C(4)-C(3)-H(3) | 120.0     |
| C(3)-C(4)-C(5) | 120.0     |
| C(3)-C(4)-H(4) | 120.0     |
| C(5)-C(4)-H(4) | 120.0     |
| C(6)-C(5)-C(4) | 120.0     |
| C(6)-C(5)-H(5) | 120.0     |
| C(4)-C(5)-H(5) | 120.0     |
| C(5)-C(6)-C(7) | 120.0     |



|                    |           |
|--------------------|-----------|
| C(5)-C(6)-H(6)     | 120.0     |
| C(7)-C(6)-H(6)     | 120.0     |
| C(6)-C(7)-C(2)     | 120.0     |
| C(6)-C(7)-C(8)     | 130.9(7)  |
| C(2)-C(7)-C(8)     | 109.0(7)  |
| O(2)-C(8)-N(1)     | 125.9(10) |
| O(2)-C(8)-C(7)     | 129.4(10) |
| N(1)-C(8)-C(7)     | 104.6(9)  |
| O(3)-C(9)-C(10)    | 109.7(8)  |
| O(3)-C(9)-C(38)    | 111.2(9)  |
| C(10)-C(9)-C(38)   | 109.3(8)  |
| O(3)-C(9)-C(16)    | 104.4(9)  |
| C(10)-C(9)-C(16)   | 111.9(9)  |
| C(38)-C(9)-C(16)   | 110.2(9)  |
| C(15)-C(10)-C(11)  | 120.0     |
| C(15)-C(10)-C(9)   | 121.4(6)  |
| C(11)-C(10)-C(9)   | 118.5(6)  |
| C(14)-C(15)-C(10)  | 120.0     |
| C(14)-C(15)-Cl(2)  | 117.5(5)  |
| C(10)-C(15)-Cl(2)  | 122.5(5)  |
| C(15)-C(14)-C(13)  | 120.0     |
| C(15)-C(14)-H(14)  | 120.0     |
| C(13)-C(14)-H(14)  | 120.0     |
| C(14)-C(13)-C(12)  | 120.0     |
| C(14)-C(13)-Cl(1)  | 120.3(5)  |
| C(12)-C(13)-Cl(1)  | 119.7(5)  |
| C(11)-C(12)-C(13)  | 120.0     |
| C(11)-C(12)-H(12)  | 120.0     |
| C(13)-C(12)-H(12)  | 120.0     |
| C(12)-C(11)-C(10)  | 120.0     |
| C(12)-C(11)-H(11)  | 120.0     |
| C(10)-C(11)-H(11)  | 120.0     |
| O(4)-C(16)-O(5)    | 126.6(12) |
| O(4)-C(16)-C(9)    | 123.4(12) |
| O(5)-C(16)-C(9)    | 109.9(10) |
| C(18)-C(17)-O(5)   | 110.7(11) |
| C(18)-C(17)-H(17A) | 109.5     |
| O(5)-C(17)-H(17A)  | 109.5     |

|                     |           |
|---------------------|-----------|
| C(18)-C(17)-H(17B)  | 109.5     |
| O(5)-C(17)-H(17B)   | 109.5     |
| H(17A)-C(17)-H(17B) | 108.1     |
| C(17)-C(18)-H(18A)  | 109.5     |
| C(17)-C(18)-H(18B)  | 109.5     |
| H(18A)-C(18)-H(18B) | 109.5     |
| C(17)-C(18)-H(18C)  | 109.5     |
| H(18A)-C(18)-H(18C) | 109.5     |
| H(18B)-C(18)-H(18C) | 109.5     |
| O(6)-C(19)-C(20)    | 130.9(12) |
| O(6)-C(19)-N(4)     | 124.2(11) |
| C(20)-C(19)-N(4)    | 104.8(10) |
| C(21)-C(20)-C(25)   | 120.0     |
| C(21)-C(20)-C(19)   | 130.0(8)  |
| C(25)-C(20)-C(19)   | 109.9(8)  |
| C(20)-C(21)-C(22)   | 120.0     |
| C(20)-C(21)-H(21)   | 120.0     |
| C(22)-C(21)-H(21)   | 120.0     |
| C(23)-C(22)-C(21)   | 120.0     |
| C(23)-C(22)-H(22)   | 120.0     |
| C(21)-C(22)-H(22)   | 120.0     |
| C(24)-C(23)-C(22)   | 120.0     |
| C(24)-C(23)-H(23)   | 120.0     |
| C(22)-C(23)-H(23)   | 120.0     |
| C(23)-C(24)-C(25)   | 120.0     |
| C(23)-C(24)-H(24)   | 120.0     |
| C(25)-C(24)-H(24)   | 120.0     |
| C(24)-C(25)-C(20)   | 120.0     |
| C(24)-C(25)-C(26)   | 130.7(8)  |
| C(20)-C(25)-C(26)   | 109.3(8)  |
| O(7)-C(26)-N(4)     | 126.0(10) |
| O(7)-C(26)-C(25)    | 129.5(11) |
| N(4)-C(26)-C(25)    | 104.5(9)  |
| O(8)-C(27)-C(37)    | 111.1(9)  |
| O(8)-C(27)-C(28)    | 108.9(8)  |
| C(37)-C(27)-C(28)   | 108.5(8)  |
| O(8)-C(27)-C(34)    | 106.6(9)  |
| C(37)-C(27)-C(34)   | 111.9(10) |

|                      |           |
|----------------------|-----------|
| C(28)-C(27)-C(34)    | 109.8(9)  |
| C(33)-C(28)-C(29)    | 120.0     |
| C(33)-C(28)-C(27)    | 121.4(7)  |
| C(29)-C(28)-C(27)    | 118.6(7)  |
| C(28)-C(33)-C(32)    | 120.0     |
| C(28)-C(33)-Cl(4)    | 122.9(5)  |
| C(32)-C(33)-Cl(4)    | 117.1(5)  |
| C(31)-C(32)-C(33)    | 120.0     |
| C(31)-C(32)-H(32)    | 120.0     |
| C(33)-C(32)-H(32)    | 120.0     |
| C(32)-C(31)-C(30)    | 120.0     |
| C(32)-C(31)-Cl(3)    | 118.9(5)  |
| C(30)-C(31)-Cl(3)    | 121.0(5)  |
| C(31)-C(30)-C(29)    | 120.0     |
| C(31)-C(30)-H(30)    | 120.0     |
| C(29)-C(30)-H(30)    | 120.0     |
| C(30)-C(29)-C(28)    | 120.0     |
| C(30)-C(29)-H(29)    | 120.0     |
| C(28)-C(29)-H(29)    | 120.0     |
| O(9)-C(34)-O(10)     | 126.5(13) |
| O(9)-C(34)-C(27)     | 123.0(13) |
| O(10)-C(34)-C(27)    | 110.5(11) |
| C(36A)-C(35A)-O(10)  | 96(2)     |
| C(36A)-C(35A)-H(35A) | 112.5     |
| O(10)-C(35A)-H(35A)  | 112.5     |
| C(36A)-C(35A)-H(35B) | 112.5     |
| O(10)-C(35A)-H(35B)  | 112.5     |
| H(35A)-C(35A)-H(35B) | 110.0     |
| C(35A)-C(36A)-H(36A) | 109.5     |
| C(35A)-C(36A)-H(36B) | 109.5     |
| H(36A)-C(36A)-H(36B) | 109.5     |
| C(35A)-C(36A)-H(36C) | 109.5     |
| H(36A)-C(36A)-H(36C) | 109.5     |
| H(36B)-C(36A)-H(36C) | 109.5     |
| C(35B)-C(36B)-H(36D) | 109.5     |
| C(35B)-C(36B)-H(36E) | 109.5     |
| H(36D)-C(36B)-H(36E) | 109.5     |
| C(35B)-C(36B)-H(36F) | 109.5     |

|                      |           |
|----------------------|-----------|
| H(36D)-C(36B)-H(36F) | 109.5     |
| H(36E)-C(36B)-H(36F) | 109.5     |
| C(36B)-C(35B)-O(10)  | 101.8(17) |
| C(36B)-C(35B)-H(35C) | 111.4     |
| O(10)-C(35B)-H(35C)  | 111.4     |
| C(36B)-C(35B)-H(35D) | 111.4     |
| O(10)-C(35B)-H(35D)  | 111.4     |
| H(35C)-C(35B)-H(35D) | 109.3     |
| C(8)-N(1)-N(2)       | 129.7(9)  |
| C(8)-N(1)-C(1)       | 113.1(9)  |
| N(2)-N(1)-C(1)       | 116.9(9)  |
| C(38)-N(2)-N(1)      | 117.0(8)  |
| N(2)-C(38)-C(9)      | 115.2(10) |
| N(2)-C(38)-H(38)     | 122.4     |
| C(9)-C(38)-H(38)     | 122.4     |
| N(5)-N(4)-C(26)      | 129.2(9)  |
| N(5)-N(4)-C(19)      | 118.8(9)  |
| C(26)-N(4)-C(19)     | 111.4(9)  |
| C(37)-N(5)-N(4)      | 120.1(9)  |
| N(5)-C(37)-C(27)     | 116.9(10) |
| N(5)-C(37)-H(37)     | 121.5     |
| C(27)-C(37)-H(37)    | 121.5     |
| C(9)-O(3)-H(3A)      | 108.2     |
| C(16)-O(5)-C(17)     | 116.3(9)  |
| C(27)-O(8)-H(8)      | 109.3     |
| C(34)-O(10)-C(35B)   | 107.2(12) |
| C(34)-O(10)-C(35A)   | 121.4(19) |

---

Symmetry transformations used to generate equivalent atoms:

Table 2-4. Anisotropic displacement parameters ( $\text{\AA}^2 \times 10^3$ ) for 1\_a. The anisotropic displacement factor exponent takes the form:  $-2\pi^2 [h^2 a^{*2} U^{11} + \dots + 2 h k a^* b^* U^{12}]$

|       | U <sup>11</sup> | U <sup>22</sup> | U <sup>33</sup> | U <sup>23</sup> | U <sup>13</sup> | U <sup>12</sup> |
|-------|-----------------|-----------------|-----------------|-----------------|-----------------|-----------------|
| C(1)  | 76(8)           | 68(7)           | 71(8)           | 7(6)            | -3(7)           | -6(7)           |
| C(2)  | 78(8)           | 59(7)           | 60(7)           | 3(6)            | -11(6)          | 12(6)           |
| C(3)  | 74(8)           | 66(7)           | 86(9)           | 1(7)            | -2(7)           | 12(7)           |
| C(4)  | 91(9)           | 67(7)           | 91(9)           | -17(7)          | -26(8)          | 6(7)            |
| C(5)  | 91(10)          | 84(9)           | 90(10)          | -15(8)          | -23(8)          | -8(8)           |
| C(6)  | 66(8)           | 86(8)           | 95(10)          | 1(8)            | -6(7)           | -2(7)           |
| C(7)  | 62(7)           | 62(7)           | 77(8)           | 1(7)            | -13(7)          | 2(6)            |
| C(8)  | 55(8)           | 68(7)           | 71(8)           | 6(6)            | 7(6)            | 5(6)            |
| C(9)  | 66(7)           | 68(7)           | 87(8)           | -14(7)          | -6(6)           | -10(7)          |
| C(10) | 77(8)           | 54(6)           | 60(7)           | 0(5)            | -13(6)          | 0(6)            |
| C(15) | 40(6)           | 78(8)           | 84(8)           | -15(7)          | -4(6)           | 15(6)           |
| C(14) | 76(8)           | 67(7)           | 72(8)           | -16(6)          | 3(6)            | -7(6)           |
| C(13) | 76(7)           | 60(7)           | 86(8)           | -8(6)           | -3(7)           | -1(6)           |
| C(12) | 72(7)           | 90(9)           | 83(8)           | 8(7)            | -9(7)           | 2(7)            |
| C(11) | 61(7)           | 85(8)           | 82(8)           | -21(7)          | -10(6)          | -11(7)          |
| C(16) | 120(10)         | 59(8)           | 81(9)           | -12(7)          | -18(9)          | 5(8)            |
| C(17) | 134(12)         | 108(11)         | 122(13)         | -24(9)          | -21(9)          | 55(10)          |
| C(18) | 178(14)         | 152(14)         | 86(10)          | 11(10)          | 2(10)           | 85(12)          |
| C(19) | 64(8)           | 77(8)           | 96(10)          | -8(7)           | -17(8)          | -1(7)           |
| C(20) | 66(8)           | 78(8)           | 65(7)           | -4(7)           | -7(6)           | -4(6)           |
| C(21) | 82(9)           | 92(9)           | 85(10)          | -7(8)           | 3(7)            | 11(8)           |
| C(22) | 116(10)         | 74(8)           | 71(8)           | -2(7)           | 7(8)            | -3(8)           |
| C(23) | 106(11)         | 92(9)           | 94(10)          | 14(8)           | -14(8)          | 21(9)           |
| C(24) | 77(8)           | 64(8)           | 117(11)         | -14(8)          | 1(8)            | 13(7)           |
| C(25) | 64(7)           | 51(7)           | 88(8)           | -13(6)          | -4(7)           | -5(6)           |
| C(26) | 87(10)          | 54(7)           | 70(8)           | 2(6)            | -6(7)           | -3(7)           |
| C(27) | 83(8)           | 73(8)           | 64(7)           | -3(6)           | -5(6)           | 14(7)           |
| C(28) | 71(7)           | 44(6)           | 82(8)           | 8(6)            | -5(7)           | 2(6)            |
| C(33) | 66(7)           | 63(7)           | 76(7)           | -3(6)           | -16(6)          | -13(6)          |
| C(32) | 78(8)           | 66(7)           | 85(8)           | 1(6)            | 5(7)            | -1(7)           |
| C(31) | 78(7)           | 67(7)           | 63(6)           | -7(6)           | -6(6)           | -7(6)           |
| C(30) | 83(8)           | 57(7)           | 102(9)          | 3(7)            | -13(7)          | -5(7)           |
| C(29) | 69(7)           | 76(8)           | 74(7)           | -9(6)           | -11(6)          | 8(6)            |

|        |         |        |         |        |         |         |
|--------|---------|--------|---------|--------|---------|---------|
| C(34)  | 133(11) | 67(9)  | 86(10)  | -11(8) | -15(9)  | 2(9)    |
| C(35A) | 173(12) | 65(10) | 131(10) | 4(10)  | -56(11) | -22(9)  |
| C(36A) | 172(18) | 79(14) | 128(15) | 16(12) | -40(16) | 4(14)   |
| C(36B) | 147(17) | 75(14) | 141(14) | 17(13) | -40(13) | -23(13) |
| C(35B) | 180(12) | 57(9)  | 137(10) | 5(9)   | -54(10) | -13(9)  |
| Cl(1)  | 100(2)  | 107(2) | 82(2)   | 8(2)   | -26(2)  | 4(2)    |
| Cl(2)  | 63(2)   | 111(2) | 96(2)   | -5(2)  | -5(2)   | 8(2)    |
| Cl(3)  | 126(3)  | 118(2) | 80(2)   | -21(2) | -7(2)   | -29(2)  |
| Cl(4)  | 71(2)   | 130(3) | 107(2)  | -4(2)  | -9(2)   | -15(2)  |
| N(1)   | 71(6)   | 60(6)  | 60(5)   | -2(5)  | -12(5)  | 7(5)    |
| N(2)   | 65(5)   | 65(6)  | 75(6)   | 3(5)   | -4(5)   | 0(5)    |
| C(38)  | 65(7)   | 73(8)  | 74(7)   | 1(7)   | 1(6)    | 5(6)    |
| N(4)   | 56(6)   | 73(6)  | 65(6)   | -1(5)  | 0(5)    | 4(5)    |
| N(5)   | 75(6)   | 65(6)  | 76(6)   | -1(5)  | -17(5)  | 6(5)    |
| C(37)  | 68(7)   | 65(7)  | 73(7)   | -2(7)  | -21(6)  | 4(6)    |
| O(1)   | 64(5)   | 112(6) | 95(5)   | -8(5)  | 4(4)    | -11(5)  |
| O(2)   | 76(5)   | 111(7) | 97(6)   | -7(5)  | 16(5)   | -12(5)  |
| O(3)   | 75(5)   | 85(5)  | 90(5)   | 4(4)   | -3(4)   | -25(4)  |
| O(4)   | 207(10) | 82(6)  | 90(6)   | -23(5) | -40(7)  | 38(7)   |
| O(5)   | 118(6)  | 82(6)  | 70(5)   | -4(4)  | -19(5)  | 24(5)   |
| O(6)   | 69(5)   | 160(8) | 90(6)   | 4(6)   | 5(5)    | 26(6)   |
| O(7)   | 67(5)   | 101(6) | 95(6)   | 15(5)  | 17(5)   | 9(5)    |
| O(8)   | 123(7)  | 109(6) | 85(5)   | -8(5)  | -3(5)   | 49(6)   |
| O(9)   | 247(12) | 60(5)  | 114(7)  | 2(5)   | -55(8)  | -1(7)   |
| O(10)  | 178(8)  | 69(5)  | 134(7)  | 7(5)   | -68(7)  | -26(5)  |

---

Table 2-5. Hydrogen coordinates ( $\times 10^4$ ) and isotropic displacement parameters ( $\text{\AA}^2 \times 10^{-3}$ ) for 1\_a.

|        | x    | y    | z     | U(eq) |
|--------|------|------|-------|-------|
| H(3)   | 2141 | 7087 | 10304 | 90    |
| H(4)   | 3455 | 8002 | 10717 | 100   |
| H(5)   | 4962 | 8137 | 10137 | 106   |
| H(6)   | 5155 | 7357 | 9143  | 98    |
| H(14)  | 3130 | 5495 | 5243  | 86    |
| H(12)  | 148  | 5186 | 5591  | 98    |
| H(11)  | 511  | 4484 | 6592  | 91    |
| H(17A) | 3727 | 1762 | 7600  | 146   |
| H(17B) | 4667 | 2387 | 7412  | 146   |
| H(18A) | 5030 | 1726 | 8369  | 208   |
| H(18B) | 3978 | 2019 | 8665  | 208   |
| H(18C) | 4800 | 2792 | 8519  | 208   |
| H(21)  | 6772 | 2858 | 8061  | 104   |
| H(22)  | 8053 | 1908 | 8479  | 104   |
| H(23)  | 9527 | 1669 | 7880  | 117   |
| H(24)  | 9721 | 2380 | 6862  | 103   |
| H(32)  | 8172 | 4675 | 2951  | 91    |
| H(30)  | 5146 | 4616 | 3188  | 97    |
| H(29)  | 5331 | 5199 | 4244  | 87    |
| H(35A) | 9756 | 7039 | 5532  | 148   |
| H(35B) | 9167 | 7717 | 5040  | 148   |
| H(36A) | 9224 | 8411 | 6091  | 190   |
| H(36B) | 8100 | 8184 | 5893  | 190   |
| H(36C) | 8681 | 7515 | 6378  | 190   |
| H(36D) | 9808 | 8094 | 6005  | 181   |
| H(36E) | 9102 | 7365 | 6361  | 181   |
| H(36F) | 9912 | 7012 | 5854  | 181   |
| H(35C) | 9016 | 7736 | 5008  | 150   |
| H(35D) | 8198 | 8091 | 5520  | 150   |
| H(38)  | 3397 | 5149 | 7530  | 85    |
| H(37)  | 8073 | 4701 | 5255  | 83    |
| H(3A)  | 1250 | 4115 | 7814  | 125   |

H(8)

5888

5656

5516

158

---



Table 2-6. Torsion angles [°] for 1\_a.

---

|                         |            |
|-------------------------|------------|
| O(1)-C(1)-C(2)-C(3)     | -2.0(16)   |
| N(1)-C(1)-C(2)-C(3)     | -179.0(5)  |
| O(1)-C(1)-C(2)-C(7)     | 178.2(10)  |
| N(1)-C(1)-C(2)-C(7)     | 1.2(8)     |
| C(7)-C(2)-C(3)-C(4)     | 0.0        |
| C(1)-C(2)-C(3)-C(4)     | -179.8(8)  |
| C(2)-C(3)-C(4)-C(5)     | 0.0        |
| C(3)-C(4)-C(5)-C(6)     | 0.0        |
| C(4)-C(5)-C(6)-C(7)     | 0.0        |
| C(5)-C(6)-C(7)-C(2)     | 0.0        |
| C(5)-C(6)-C(7)-C(8)     | -178.3(8)  |
| C(3)-C(2)-C(7)-C(6)     | 0.0        |
| C(1)-C(2)-C(7)-C(6)     | 179.8(6)   |
| C(3)-C(2)-C(7)-C(8)     | 178.6(6)   |
| C(1)-C(2)-C(7)-C(8)     | -1.6(7)    |
| C(6)-C(7)-C(8)-O(2)     | -1.0(15)   |
| C(2)-C(7)-C(8)-O(2)     | -179.4(10) |
| C(6)-C(7)-C(8)-N(1)     | 179.7(5)   |
| C(2)-C(7)-C(8)-N(1)     | 1.3(8)     |
| O(3)-C(9)-C(10)-C(15)   | -175.1(6)  |
| C(38)-C(9)-C(10)-C(15)  | 62.7(9)    |
| C(16)-C(9)-C(10)-C(15)  | -59.7(10)  |
| O(3)-C(9)-C(10)-C(11)   | 7.5(9)     |
| C(38)-C(9)-C(10)-C(11)  | -114.7(8)  |
| C(16)-C(9)-C(10)-C(11)  | 122.9(8)   |
| C(11)-C(10)-C(15)-C(14) | 0.0        |
| C(9)-C(10)-C(15)-C(14)  | -177.4(7)  |
| C(11)-C(10)-C(15)-Cl(2) | -176.8(5)  |
| C(9)-C(10)-C(15)-Cl(2)  | 5.8(7)     |
| C(10)-C(15)-C(14)-C(13) | 0.0        |
| Cl(2)-C(15)-C(14)-C(13) | 177.0(5)   |
| C(15)-C(14)-C(13)-C(12) | 0.0        |
| C(15)-C(14)-C(13)-Cl(1) | -178.6(5)  |
| C(14)-C(13)-C(12)-C(11) | 0.0        |
| Cl(1)-C(13)-C(12)-C(11) | 178.7(5)   |
| C(13)-C(12)-C(11)-C(10) | 0.0        |

|                         |            |
|-------------------------|------------|
| C(15)-C(10)-C(11)-C(12) | 0.0        |
| C(9)-C(10)-C(11)-C(12)  | 177.5(7)   |
| O(3)-C(9)-C(16)-O(4)    | 85.9(15)   |
| C(10)-C(9)-C(16)-O(4)   | -32.7(16)  |
| C(38)-C(9)-C(16)-O(4)   | -154.6(13) |
| O(3)-C(9)-C(16)-O(5)    | -90.7(10)  |
| C(10)-C(9)-C(16)-O(5)   | 150.7(9)   |
| C(38)-C(9)-C(16)-O(5)   | 28.9(13)   |
| O(6)-C(19)-C(20)-C(21)  | -4.8(16)   |
| N(4)-C(19)-C(20)-C(21)  | 179.5(5)   |
| O(6)-C(19)-C(20)-C(25)  | 177.7(11)  |
| N(4)-C(19)-C(20)-C(25)  | 2.0(8)     |
| C(25)-C(20)-C(21)-C(22) | 0.0        |
| C(19)-C(20)-C(21)-C(22) | -177.3(8)  |
| C(20)-C(21)-C(22)-C(23) | 0.0        |
| C(21)-C(22)-C(23)-C(24) | 0.0        |
| C(22)-C(23)-C(24)-C(25) | 0.0        |
| C(23)-C(24)-C(25)-C(20) | 0.0        |
| C(23)-C(24)-C(25)-C(26) | 178.1(8)   |
| C(21)-C(20)-C(25)-C(24) | 0.0        |
| C(19)-C(20)-C(25)-C(24) | 177.8(7)   |
| C(21)-C(20)-C(25)-C(26) | -178.5(7)  |
| C(19)-C(20)-C(25)-C(26) | -0.7(7)    |
| C(24)-C(25)-C(26)-O(7)  | 1.2(15)    |
| C(20)-C(25)-C(26)-O(7)  | 179.5(10)  |
| C(24)-C(25)-C(26)-N(4)  | -179.2(5)  |
| C(20)-C(25)-C(26)-N(4)  | -0.9(8)    |
| O(8)-C(27)-C(28)-C(33)  | 170.1(6)   |
| C(37)-C(27)-C(28)-C(33) | -68.8(10)  |
| C(34)-C(27)-C(28)-C(33) | 53.8(10)   |
| O(8)-C(27)-C(28)-C(29)  | -9.2(10)   |
| C(37)-C(27)-C(28)-C(29) | 111.9(8)   |
| C(34)-C(27)-C(28)-C(29) | -125.6(8)  |
| C(29)-C(28)-C(33)-C(32) | 0.0        |
| C(27)-C(28)-C(33)-C(32) | -179.3(7)  |
| C(29)-C(28)-C(33)-Cl(4) | -179.8(6)  |
| C(27)-C(28)-C(33)-Cl(4) | 0.9(7)     |
| C(28)-C(33)-C(32)-C(31) | 0.0        |

|                         |            |
|-------------------------|------------|
| Cl(4)-C(33)-C(32)-C(31) | 179.8(5)   |
| C(33)-C(32)-C(31)-C(30) | 0.0        |
| C(33)-C(32)-C(31)-Cl(3) | 177.2(5)   |
| C(32)-C(31)-C(30)-C(29) | 0.0        |
| Cl(3)-C(31)-C(30)-C(29) | -177.2(5)  |
| C(31)-C(30)-C(29)-C(28) | 0.0        |
| C(33)-C(28)-C(29)-C(30) | 0.0        |
| C(27)-C(28)-C(29)-C(30) | 179.4(7)   |
| O(8)-C(27)-C(34)-O(9)   | -75.6(15)  |
| C(37)-C(27)-C(34)-O(9)  | 162.8(13)  |
| C(28)-C(27)-C(34)-O(9)  | 42.2(17)   |
| O(8)-C(27)-C(34)-O(10)  | 103.5(11)  |
| C(37)-C(27)-C(34)-O(10) | -18.1(14)  |
| C(28)-C(27)-C(34)-O(10) | -138.7(10) |
| O(2)-C(8)-N(1)-N(2)     | 6.9(16)    |
| C(7)-C(8)-N(1)-N(2)     | -173.8(7)  |
| O(2)-C(8)-N(1)-C(1)     | -179.9(10) |
| C(7)-C(8)-N(1)-C(1)     | -0.6(10)   |
| O(1)-C(1)-N(1)-C(8)     | -177.6(10) |
| C(2)-C(1)-N(1)-C(8)     | -0.3(10)   |
| O(1)-C(1)-N(1)-N(2)     | -3.4(14)   |
| C(2)-C(1)-N(1)-N(2)     | 173.8(7)   |
| C(8)-N(1)-N(2)-C(38)    | -7.8(13)   |
| C(1)-N(1)-N(2)-C(38)    | 179.2(9)   |
| N(1)-N(2)-C(38)-C(9)    | 179.4(8)   |
| O(3)-C(9)-C(38)-N(2)    | -3.6(13)   |
| C(10)-C(9)-C(38)-N(2)   | 117.7(9)   |
| C(16)-C(9)-C(38)-N(2)   | -118.9(10) |
| O(7)-C(26)-N(4)-N(5)    | -7.5(16)   |
| C(25)-C(26)-N(4)-N(5)   | 173.0(8)   |
| O(7)-C(26)-N(4)-C(19)   | -178.2(10) |
| C(25)-C(26)-N(4)-C(19)  | 2.3(10)    |
| O(6)-C(19)-N(4)-N(5)    | 9.5(15)    |
| C(20)-C(19)-N(4)-N(5)   | -174.5(7)  |
| O(6)-C(19)-N(4)-C(26)   | -178.7(11) |
| C(20)-C(19)-N(4)-C(26)  | -2.7(10)   |
| C(26)-N(4)-N(5)-C(37)   | 2.9(14)    |
| C(19)-N(4)-N(5)-C(37)   | 173.0(9)   |

|                           |            |
|---------------------------|------------|
| N(4)-N(5)-C(37)-C(27)     | -179.2(8)  |
| O(8)-C(27)-C(37)-N(5)     | -2.8(13)   |
| C(28)-C(27)-C(37)-N(5)    | -122.6(10) |
| C(34)-C(27)-C(37)-N(5)    | 116.2(11)  |
| O(4)-C(16)-O(5)-C(17)     | 2(2)       |
| C(9)-C(16)-O(5)-C(17)     | 178.7(10)  |
| C(18)-C(17)-O(5)-C(16)    | -169.1(13) |
| O(9)-C(34)-O(10)-C(35B)   | 5(3)       |
| C(27)-C(34)-O(10)-C(35B)  | -173.6(18) |
| O(9)-C(34)-O(10)-C(35A)   | -17(2)     |
| C(27)-C(34)-O(10)-C(35A)  | 163.5(16)  |
| C(36B)-C(35B)-O(10)-C(34) | -175(3)    |
| C(36A)-C(35A)-O(10)-C(34) | 114(3)     |

---

Symmetry transformations used to generate equivalent atoms:

Table 2-7. Hydrogen bonds for 1\_a [Å and °].

| D-H...A | d(D-H) | d(H...A) | d(D...A) | <(DHA) |
|---------|--------|----------|----------|--------|
|---------|--------|----------|----------|--------|
